# Supplementary material for: Cu-catalyzed efficient construction of S (Se)-containing functional organosilicon compounds
Source: Royal Society of Chemistry journal article supplement (doi:10.1039/d2cc04512e), 2022-01-01

# Supporting Information for

## Cu-catalyzed efficient construction of S (Se)- containing functional organosilicon compounds

Fei Wang<sup>a</sup>, Ying Chen<sup>a</sup>, Weidong Rao<sup>b</sup>, Shu-Su Shen<sup>c</sup>, Shun-Yi Wang<sup>a,\*</sup>

<sup>a</sup>Key Laboratory of Organic Synthesis of Jiangsu Province, College of Chemistry, Chemical Engineering and Materials Science & Collaborative Innovation Center of Suzhou Nano Science and Technology, Soochow University, Suzhou, 215123, P. R. China

E-mail: shunyi@suda.edu.cn

<sup>b</sup>Key Laboratory of Biomass-based Green Fuels and Chemicals, College of Chemical Engineering, Nanjing Forestry University, Nanjing 210037, China.

<sup>c</sup>School of Environmental Science and Engineering, Suzhou University of Science and Technology, No.99, Xuefu road, Huqiu district, Suzhou, PR China, 215009.

### Contents

|                                                                         |     |
|-------------------------------------------------------------------------|-----|
| I. General Information.....                                             | S2  |
| II. Synthesis of Substrates.....                                        | S2  |
| III. General Procedure .....                                            | S4  |
| IV. Optimization of the reaction conditions.....                        | S5  |
| V. Mechanism Investigation .....                                        | S5  |
| VI. Product Characterization .....                                      | S6  |
| VII. References .....                                                   | S19 |
| VIII. Copies of <sup>1</sup> H NMR and <sup>13</sup> C NMR Spectra..... | S20 |



(45 mL) was added dropwise over a period of 15 min and the reaction mixture was heated to 50 °C for another 2 h followed by the slow addition of commercial available RMgBr (3.3 mmol, 1.1 equiv) at 0 °C. The mixture was stirred for 4 h at ambient temperature. The mixture was then quenched by water (5 mL) and saturated aqueous NH<sub>4</sub>Cl solution (15 mL). The organic phase was separated, and the aqueous layer was extracted with EtOAc (20 mL×2). The combined organic layers were dried over MgSO<sub>4</sub> and concentrated under reduced pressure to afford crude product. The residue was purified by flash column chromatography on silica gel using petroleum ether or petroleum ether/EtOAc to afford corresponding SCB **1j**, **1k**.

### 3. Synthesis of 1,1-diphenylsilolane and 1,1-diphenylsilinane.<sup>3</sup>

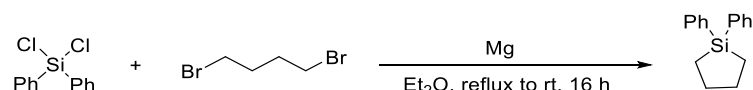

A portion of 1 mL of a solution of 1,4-dibromobutane (1.54 mL, 13 mmol) in diethyl ether (5 mL) was added to a stirred suspension of magnesium turnings (729 mg, 30 mmol) in diethyl ether (5 mL), and the reaction was started by gentle heating. Subsequently, the remaining 1,4-dibromobutane solution was added within 2 h, causing the mixture to boil under reflux. After the addition was complete, the mixture was heated under reflux for a further 90 min and then cooled to 20 °C within 1 h. The resulting two-phase Grignard reagent was added dropwise within 2 h to a solution of dichlorodiphenylsilane (2.08 mL, 10 mmol) in diethyl ether (5 mL), causing the mixture to boil under reflux. The reaction mixture was stirred at 20 °C for 16 h and acidified with 1N HCl. The resulting mixture was extracted with diethylether, the organic layer was washed with NaHCO<sub>3</sub> aq., brine, and dried over Na<sub>2</sub>SO<sub>4</sub>, filtered and concentrated. The residue was chromatographed on silica gel (Hexane) to afford the target product as a colorless oil.

### General procedure for the synthesis of PhSO<sub>2</sub>SNa.<sup>4</sup>

Sodium benzenesulfinate (10 g, 61 mmol) and sulfur (1.95 g, 61 mmol) were dissolved in anhydrous pyridine (60 mL) to give a yellow solution. The reaction was stirred under argon and after 1 h gave a white suspension. Et<sub>2</sub>O was added to the suspension, and the reaction was filtered and washed with anhydrous diethyl ether. Recrystallization from anhydrous ethanol afforded PhSO<sub>2</sub>SNa (10.5 g, 88%) as a white crystalline solid.

### General procedure for the synthesis of PhSO<sub>2</sub>SAr or PhSO<sub>2</sub>SeAr.<sup>4</sup>

A mixture of PhSO<sub>2</sub>Na (4 equiv), disulphide (1 equiv) and NBS (2 equiv) in MeCN was stirred at room temperature. After the completion of the reaction, as monitored by TLC, the reaction mixture was washed with water and extracted with ethyl acetate. The organic phase was separated and dried over anhydrous Na<sub>2</sub>SO<sub>4</sub> and filtered. The filtrate was concentrated and the resulting residue was purified by column chromatography to provide the desired aryl-thiosulfonates.

## General procedure for the synthesis of PhSO<sub>2</sub>SAlkyl.

To a solution of PhSO<sub>2</sub>SNa (1 equiv) in DMF was added Alkyl bromide (2 equiv) and the reaction mixture was stirred at room temperature. After the completion of the reaction, as monitored by TLC, the reaction mixture was diluted with ethyl acetate and washed with water. The organic phase was separated and dried over anhydrous Na<sub>2</sub>SO<sub>4</sub> and filtered. The filtrate was concentrated and the resulting residue was purified by column chromatography to provide the desired alkylthiosulfonates.

## III .General Procedure

**A representative procedure synthesis of diphenyl(3-(phenylthio)propyl)silanol (3a) is shown below.**

An oven-dried screw-capped 8-mL vial equipped with a magnetic stir bar was charged with 1,1-diphenylsiletane **1a** (0.6 mmol, 1.5 equiv), *S*-phenyl benzenesulfonylthioate **2a** (0.4 mmol, 1.0 equiv), Cu(MeCN)<sub>4</sub>PF<sub>6</sub> (5 mol %), DMA (1.0 mL) was added via syringe under N<sub>2</sub> atmosphere and the mixture was stirred at 40 °C (oil bath). After 12 h, cooled to r.t. The system was extracted with EA (3 times). The combined organic layers were dried over Na<sub>2</sub>SO<sub>4</sub> and solvent was removed under reduced pressure. The residue was purified by flash column chromatography with ethyl acetate and petroleum ether (EA : PE = 1 : 20) as eluents to afford pure product **3a**. Yield 68% (95.2 mg) (Note: The products obtained in this paper are perishable and need to be stored at low temperature).

**The procedure scale-up synthesis of diphenyl(3-(phenylthio)propyl)silanol (3a) is shown below.**

An oven-dried screw-capped 8-mL vial equipped with a magnetic stir bar was charged with 1,1-diphenylsiletane **1a** (1.5 mmol, 1.5 equiv), *S*-phenyl benzenesulfonylthioate **2a** (1.0 mmol, 1.0 equiv), Cu(MeCN)<sub>4</sub>PF<sub>6</sub> (5 mol %), DMA (3.0 mL) was added via syringe under N<sub>2</sub> atmosphere and the mixture was stirred at 40 °C (oil bath). After 12 h, cooled to r.t. The system was extracted with EA (3 times). The combined organic layers were dried over Na<sub>2</sub>SO<sub>4</sub> and solvent was removed under reduced pressure. The residue was purified by flash column chromatography with ethyl acetate and petroleum ether (EA : PE = 1 : 20) as eluents to afford pure product **3a**. Yield 75% (0.2684 g).

## IV. Optimization of the reaction conditions

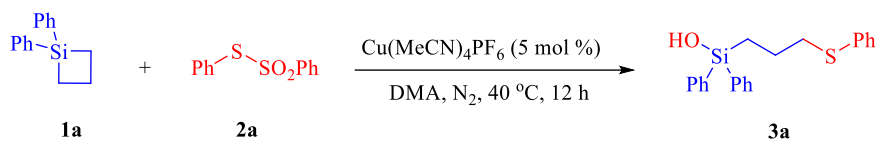

| entry | Deviation from standard conditions                                    | 3a(%)                |
|-------|-----------------------------------------------------------------------|----------------------|
| 1     | none                                                                  | 70 (68) <sup>c</sup> |
| 2     | DMF, DMSO                                                             | 51, 42               |
| 3     | DCE, MeCN                                                             | N.R                  |
| 4     | Cu(OTf) <sub>2</sub> instead of Cu(MeCN) <sub>4</sub> PF <sub>6</sub> | 30                   |
| 5     | CuI instead of Cu(MeCN) <sub>4</sub> PF <sub>6</sub>                  | 49                   |
| 6     | CuTc instead of Cu(MeCN) <sub>4</sub> PF <sub>6</sub>                 | 57                   |
| 7     | CuBr instead of Cu(MeCN) <sub>4</sub> PF <sub>6</sub>                 | 39                   |
| 8     | CuBr <sub>2</sub> instead of Cu(MeCN) <sub>4</sub> PF <sub>6</sub>    | trace                |
| 9     | 10 mol% instead of 5 mol%                                             | 52                   |
| 10    | 20 °C, 60 °C instead of 40 °C                                         | 68, 46               |
| 11    | add bipyridine, phenanthroline                                        | 33-54                |
| 12    | <b>1a : 2a = 1.0 : 1.0, 2.0 : 1.0</b>                                 | 59, 48               |

Initially, we tested the reaction of 1,1-diphenylsiletane **1a** with S-phenyl benzenesulfonothioate **2a** and Cu(OAc)<sub>2</sub> (5 mol %) in DMF at 40 °C for 12 hours under a N<sub>2</sub> atmosphere. Gratifyingly, the reaction proceeded selectively to give the target product diphenyl(3-(phenylthio)propyl)silanol **3a**. With this promising result in hand, we tried to further optimize the reaction conditions. As briefly illustrated in Table 1, first, we probed the reactions in several different solvents, such as DMF, DMA, DMSO, and MeCN. DMA was crucial for the successful transformation of substrate **1a** (Table 1, entries 2-3). After systematic testing with copper catalysts, Cu(MeCN)<sub>4</sub>PF<sub>6</sub> was chosen as the catalyst because of its highest yield (Table 1, entries 4-8). Next, we conducted the amount of catalyst. Cu(MeCN)<sub>4</sub>PF<sub>6</sub> (5 mol %) provided inferior results (Table 1, entry 9). We investigated the effect of temperature on the reaction. It was found that neither raising the temperature nor lowering the temperature increased the yield (Table 1, entry 10). Finally, we tried to add ligands to increase the yield, but disappointingly, the yield of **3a** could not be increased (Table 1, entry 11). Finally, we investigated the ratio effects of **1a** and **2a**. When the ratio of **1a** to **2a** was 1.5:1.0, **3a** could be obtained in 70% LC yield (Table 1, entry 12).

## V. Mechanism Investigation

### 1. Heavy-oxygen water experiment

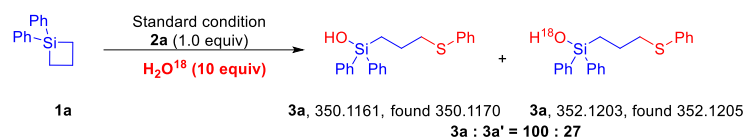

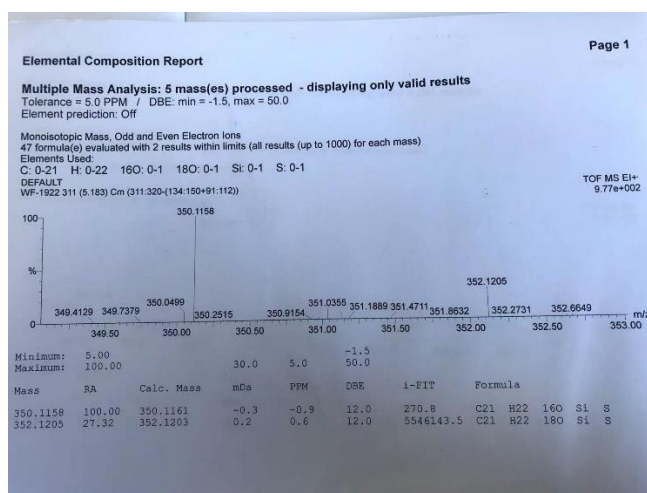

When heavy-oxygen water ( $\text{H}_2^{18}\text{O}$ ) was added, only a small part of the  $^{18}\text{O}$ -labeled product  $[\text{O}^{18}]\text{-3a}'$  could be detected by HRMS.

## 2. Deuteration experiment

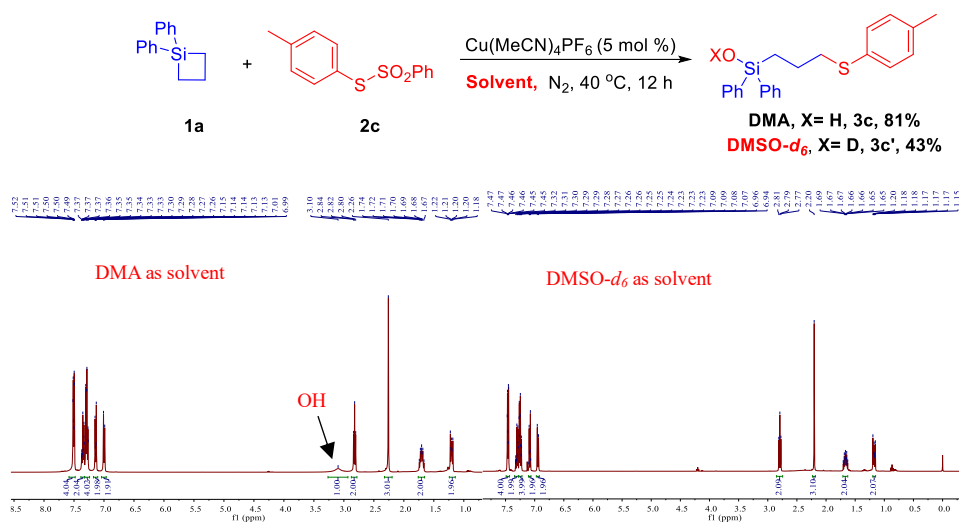

We investigated the source of hydroxyl hydrogen. The deuterated product  $3c'$  (D-inc. 100%) was successfully obtained when deuterated DMSO replaced DMA as the solvent, indicating that the hydroxyl hydrogen may come from the solvent.

## VI. Product Characterization

**diphenyl(3-(phenylthio)propyl)silanol (3a)**  
**Yield:** 68% (95.2mg). (EA : PE = 1 : 20). Pale yellow oil.  
**IR** (neat,  $\nu$ ,  $\text{cm}^{-1}$ ): 3003, 1710, 1358, 1220, 1092, 705, 529.  $^1\text{H}$  NMR (400 MHz,  $\text{CDCl}_3$ )  $\delta$  7.57 – 7.47 (m, 4H), 7.40 – 7.34 (m, 2H), 7.31 (m,  $J = 7.8$ , 6.3 Hz, 4H), 7.26 – 7.17 (m, 4H), 7.14 – 7.07 (m, 1H), 2.89 (t,  $J = 7.1$  Hz, 3H), 1.83 –

1.70 (m, 2H), 1.29 – 1.20 (m, 2H).  $^{13}\text{C}$  NMR (100 MHz,  $\text{CDCl}_3$ )  $\delta$  136.6, 135.9, 134.2, 130.0, 129.2, 128.9, 128.0, 125.8, 36.9, 22.8, 14.5. HRMS ( $\text{CI}^+$ )  $m/z$  calcd for  $\text{C}_{22}\text{H}_{24}\text{OSSi}$  ( $\text{M}$ ) $^+$ : 350.1161, found 350.1170.

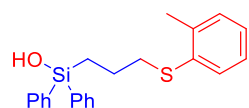

**diphenyl(3-(*o*-tolylthio)propyl)silanol (3b)**

**Yield:** 87% (127.2mg). (EA : PE = 1 : 20). Pale yellow oil. **IR** (neat,  $\text{v}$ ,  $\text{cm}^{-1}$ ): 3003, 1710, 1359, 1220, 871, 705, 529.  $^1\text{H}$  NMR (400 MHz,  $\text{CDCl}_3$ )  $\delta$  7.57 – 7.47 (m, 4H), 7.38 – 7.32 (m, 2H), 7.29 (m,  $J = 7.9$ , 6.4 Hz, 4H), 7.06 (m,  $J = 29.3$ , 14.1, 7.4, 1.7 Hz, 4H), 2.83 (t,  $J = 7.2$  Hz, 3H), 2.30 (s, 3H), 1.83 – 1.69 (m, 2H), 1.27 – 1.19 (m, 2H).  $^{13}\text{C}$  NMR (100 MHz,  $\text{CDCl}_3$ )  $\delta$  137.3, 136.0, 135.9, 134.2, 130.1, 130.0, 128.0, 127.7, 126.4, 125.4, 36.0, 22.7, 20.4, 14.7. HRMS (CI)  $m/z$  calcd for  $\text{C}_{22}\text{H}_{24}\text{OSSi}$  ( $\text{M}$ ) $^+$ : 364.1317, found 364.1320.

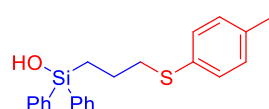

**diphenyl(3-(*p*-tolylthio)propyl)silanol (3c)**

**Yield:** 81% (117.3mg). (EA : PE = 1 : 20). Pale yellow oil. **IR** (neat,  $\text{v}$ ,  $\text{cm}^{-1}$ ): 3003, 1710, 1358, 1220, 1092, 705, 529.  $^1\text{H}$  NMR (400 MHz,  $\text{CDCl}_3$ )  $\delta$  7.58 – 7.48 (m, 4H), 7.38 – 7.33 (m, 2H), 7.29 (m,  $J = 7.9$ , 6.5 Hz, 4H), 7.17 – 7.10 (m, 2H), 7.00 (m,  $J = 8.0$  Hz, 2H), 3.10 (s, 1H), 2.82 (t,  $J = 7.1$  Hz, 2H), 2.26 (s, 3H), 1.76 – 1.65 (m, 2H), 1.24 – 1.14 (m, 2H).  $^{13}\text{C}$  NMR (100 MHz,  $\text{CDCl}_3$ )  $\delta$  136.0, 135.9, 134.2, 132.7, 130.0, 129.9, 129.7, 128.0, 37.6, 22.8, 21.1, 14.4.  $^{29}\text{Si}$  NMR (79 MHz,  $\text{CDCl}_3$ )  $\delta$  -4.22. HRMS (CI)  $m/z$  calcd for  $\text{C}_{22}\text{H}_{24}\text{OSSi}$  ( $\text{M}$ ) $^+$ : 364.1317, found 364.1323.

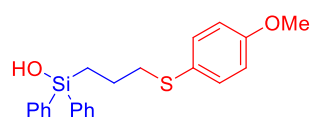

**(3-((4-methoxyphenyl)thio)propyl)diphenylsilanol (3d)**

**Yield:** 56% (85.8mg). (EA : PE = 1 : 10). Pale yellow oil. **IR** (neat,  $\text{v}$ ,  $\text{cm}^{-1}$ ): 3003, 1710, 1428, 1358, 1220, 881, 705, 529.  $^1\text{H}$  NMR (400 MHz,  $\text{CDCl}_3$ )  $\delta$  7.65 – 7.58 (m, 4H), 7.49 – 7.43 (m, 2H), 7.40 (m,  $J = 7.8$ , 6.3 Hz, 4H), 7.33 – 7.27 (m, 2H), 6.87 – 6.79 (m, 2H), 3.81 (s, 3H), 2.88 (t,  $J = 7.0$  Hz, 3H), 1.84 – 1.71 (m, 2H), 1.35 – 1.28 (m, 2H).  $^{13}\text{C}$  NMR (100 MHz,  $\text{CDCl}_3$ )  $\delta$  158.8, 136.0, 134.2, 133.2, 130.0, 128.0, 126.5, 114.6, 55.4, 39.1, 22.9, 14.3. HRMS (CI)  $m/z$  calcd for  $\text{C}_{22}\text{H}_{24}\text{O}_2\text{SSi}$  ( $\text{M}$ ) $^+$ : 380.1266, found 380.1274.

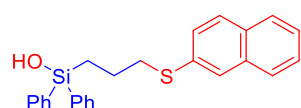

**(3-(naphthalen-2-ylthio)propyl)diphenylsilanol (3e)**

**Yield:** 70% (111.4mg). (EA : PE = 1 : 20). Pale yellow oil. **IR** (neat,  $\text{v}$ ,  $\text{cm}^{-1}$ ): 3003, 1709, 1420, 1358, 1220, 1092, 785, 529.  $^1\text{H}$  NMR (400 MHz,  $\text{CDCl}_3$ )  $\delta$  7.72 (m,  $J = 7.7$ , 1.6 Hz, 1H), 7.67 – 7.61 (m, 3H), 7.50 (m,  $J = 7.9$ , 1.2 Hz, 4H), 7.43 – 7.36 (m, 2H), 7.32 (m,  $J = 6.3$ , 4.8, 1.7 Hz, 3H), 7.26 (m,  $J = 7.8$ , 6.5 Hz, 4H), 2.96 (t,  $J = 7.1$  Hz, 2H), 2.62 (s, 1H), 1.86 – 1.74 (m, 2H), 1.29 – 1.23 (m, 2H).  $^{13}\text{C}$  NMR (100 MHz,  $\text{CDCl}_3$ )  $\delta$  135.9, 134.2, 133.8, 131.7, 130.0, 128.4, 128.0, 127.8, 127.4, 127.1, 126.8, 126.5, 125.6, 36.7, 22.8, 14.5. HRMS (CI)

m/z calcd for C<sub>25</sub>H<sub>24</sub>OSSi (M)<sup>+</sup>: 400.1317, found 400.1323.

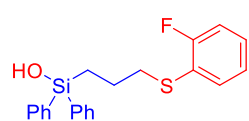

**(3-((2-fluorophenyl)thio)propyl)diphenylsilanol (3f)**

**Yield:** 90% (131.8mg). (EA : PE = 1 : 20). Pale yellow oil. **IR** (neat, v, cm<sup>-1</sup>): 3003, 1710, 1428, 1359, 1220, 1116, 1046, 871, 704, 529. **<sup>1</sup>H NMR** (400 MHz, CDCl<sub>3</sub>) δ 7.54 – 7.46 (m, 4H), 7.38 – 7.32 (m, 2H), 7.32 – 7.25 (m, 4H), 7.21 (m, *J* = 7.5, 1.8 Hz, 1H), 7.10 (m, *J* = 7.8, 5.1, 1.7 Hz, 1H), 7.00 – 6.92 (m, 2H), 3.19 (s, 1H), 2.84 (t, *J* = 7.1 Hz, 2H), 1.69 (ddt, *J* = 11.8, 8.8, 6.1 Hz, 2H), 1.24 – 1.15 (m, 2H). **<sup>13</sup>C NMR** (100 MHz, CDCl<sub>3</sub>) δ 161.3 (*J* = 243 Hz), 135.8, 134.2, 131.8 (*J* = 2.6 Hz), 120.0, 128.1, 128.0, 124.4 (*J* = 38.4 Hz), 123.3 (*J* = 17.4 Hz), 115.6 (*J* = 22.4 Hz), 36.4 (*J* = 2.3 Hz), 22.9, 14.3. **HRMS** (CI) m/z calcd for C<sub>21</sub>H<sub>21</sub>FOSSi (M)<sup>+</sup>: 368.1066, found 368.1063.

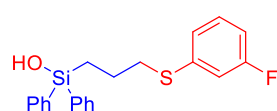

**(3-((3-fluorophenyl)thio)propyl)diphenylsilanol (3g)**

**Yield:** 73% (107.5mg). (EA : PE = 1 : 20). Pale yellow oil. **IR** (neat, v, cm<sup>-1</sup>): 3002, 1710, 1473, 1359, 1092, 704, 529. **<sup>1</sup>H NMR** (400 MHz, CDCl<sub>3</sub>) δ 7.52 (m, *J* = 6.6, 1.5 Hz, 4H), 7.41 – 7.35 (m, 2H), 7.34 – 7.28 (m, 4H), 7.13 (m, *J* = 8.0, 6.0 Hz, 1H), 6.98 – 6.87 (m, 2H), 6.82 – 6.75 (m, 1H), 2.87 (t, *J* = 7.1 Hz, 3H), 1.75 (ddt, *J* = 11.9, 8.7, 6.3 Hz, 2H), 1.26 – 1.19 (m, 2H). **<sup>13</sup>C NMR** (100 MHz, CDCl<sub>3</sub>) 162.9 (*J* = 245.9 Hz), 139.3 (*J* = 7.5 Hz), 135.8, 134.2, 130.2, 130.1, 128.1, 124.0 (*J* = 2.9 Hz), 115.1 (*J* = 23.0 Hz), 112.5 (*J* = 21.0 Hz), 36.3, 22.7, 14.5. **HRMS** (CI) m/z calcd for C<sub>21</sub>H<sub>21</sub>OSSi (M)<sup>+</sup>: 368.1066, found 368.1068.

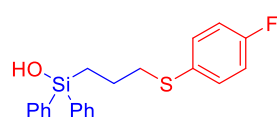

**(3-((4-fluorophenyl)thio)propyl)diphenylsilanol (3h)**

**Yield:** 72% (106.2mg). (EA : PE = 1 : 20). Pale yellow oil. **IR** (neat, v, cm<sup>-1</sup>): 3003, 1710, 1428, 1359, 1220, 1092, 871, 705, 529. **<sup>1</sup>H NMR** (400 MHz, CDCl<sub>3</sub>) δ 7.64 – 7.59 (m, 4H), 7.50 – 7.44 (m, 2H), 7.41 (m, *J* = 7.9, 6.4 Hz, 4H), 7.32 – 7.27 (m, 2H), 7.02 – 6.94 (m, 2H), 3.02 (s, 1H), 2.91 (t, *J* = 7.1 Hz, 2H), 1.83 – 1.76 (m, 2H), 1.34 – 1.28 (m, 2H). **<sup>13</sup>C NMR** (100 MHz, CDCl<sub>3</sub>) δ 161.7 (*J* = 244.3 Hz), 135.9, 134.2, 132.3 (*J* = 8.0 Hz), 131.2 (*J* = 3.3 Hz), 130.1, 128.0, 116.0 (*J* = 21.7 Hz), 38.2, 22.8, 14.3. **HRMS** (CI) m/z calcd for C<sub>21</sub>H<sub>21</sub>OSSi (M)<sup>+</sup>: 368.1066, found 368.1061.

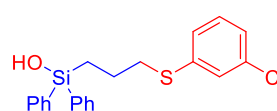

**(3-((3-chlorophenyl)thio)propyl)diphenylsilanol (3i)**

**Yield:** 75% (115.9mg). (EA : PE = 1 : 20). Pale yellow oil. **IR** (neat, v, cm<sup>-1</sup>): 3002, 1710, 1428, 1359, 1220, 1116, 870, 704, 529. **<sup>1</sup>H NMR** (400 MHz, CDCl<sub>3</sub>) δ 7.58 – 7.48 (m, 4H), 7.40 – 7.34 (m, 2H), 7.33 – 7.27 (m, 4H), 7.22 – 7.18 (m, 1H), 7.13 – 7.00 (m, 3H), 2.85 (t, *J* = 7.1 Hz, 3H), 1.80 – 1.68 (m, 2H), 1.25 – 1.17 (m, 2H). **<sup>13</sup>C NMR** (100 MHz, CDCl<sub>3</sub>) δ 139.0, 135.8, 134.6,



134.2, 130.1, 129.9, 128.1, 128.1, 126.6, 125.7, 36.4, 22.7, 14.5. **HRMS** (CI)  $m/z$  calcd for  $C_{21}H_{21}OSSi$  ( $M$ )<sup>+</sup>: 384.0771, found 384.0768.

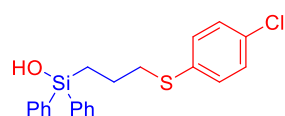

**3-((4-chlorophenyl)thio)propyl)diphenylsilanol (3j)**

**Yield:** 72% (111.0mg). (EA : PE = 1 : 20). Pale yellow oil. **IR** (neat,  $v$ ,  $cm^{-1}$ ): 3003, 1710, 1428, 1358, 1220, 1094, 704, 529. **<sup>1</sup>H NMR** (400 MHz,  $CDCl_3$ )  $\delta$  7.51 (m,  $J = 6.7, 1.5$  Hz, 4H), 7.41 – 7.35 (m, 2H), 7.31 (m,  $J = 7.9, 6.4$  Hz, 4H), 7.17 – 7.08 (m, 4H), 3.07 (s, 1H), 2.84 (t,  $J = 7.1$  Hz, 2H), 1.76 – 1.67 (m, 2H), 1.25 – 1.19 (m, 2H). **<sup>13</sup>C NMR** (100 MHz,  $CDCl_3$ )  $\delta$  135.8, 135.1, 134.2, 131.7, 130.5, 130.1, 129.0, 128.1, 37.1, 22.7, 14.4. **HRMS** (CI)  $m/z$  calcd for  $C_{21}H_{21}OSSi$  ( $M$ )<sup>+</sup>: 384.0771, found 384.0763.

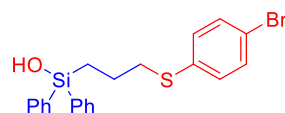

**3-((4-bromophenyl)thio)propyl)diphenylsilanol (3k)**

**Yield:** 79% (135.9mg). (EA : PE = 1 : 20). Pale yellow oil. **IR** (neat,  $v$ ,  $cm^{-1}$ ): 3003, 1710, 1358, 1094, 818, 743, 511. **<sup>1</sup>H NMR** (400 MHz,  $CDCl_3$ )  $\delta$  7.54 – 7.45 (m, 4H), 7.40 – 7.34 (m, 2H), 7.34 – 7.22 (m, 6H), 7.07 – 6.95 (m, 2H), 3.14 (s, 1H), 2.81 (t,  $J = 7.1$  Hz, 2H), 1.78 – 1.63 (m, 2H), 1.25 – 1.09 (m, 2H). **<sup>13</sup>C NMR** (100 MHz,  $CDCl_3$ )  $\delta$  135.8, 135.7, 134.2, 131.9, 130.6, 130.1, 128.0, 119.5, 36.8, 22.6, 14.4. **HRMS** (CI)  $m/z$  calcd for  $C_{21}H_{21}OBrSSi$  ( $M$ )<sup>+</sup>: 428.0266, found 428.0271.

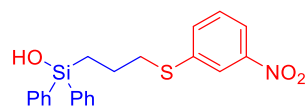

**3-((3-nitrophenyl)thio)propyl)diphenylsilanol (3l)**

**Yield:** 74% (116.3mg). (EA : PE = 1 : 10). Yellow oil. **IR** (neat,  $v$ ,  $cm^{-1}$ ): 3011, 1702, 1523, 1346, 1113, 844, 729, 698. **<sup>1</sup>H NMR** (400 MHz,  $CDCl_3$ )  $\delta$  7.99 (m,  $J = 2.1$  Hz, 1H), 7.87 (m,  $J = 8.2, 2.3, 1.0$  Hz, 1H), 7.59 – 7.49 (m, 4H), 7.42 (m,  $J = 7.9, 1.2$  Hz, 1H), 7.39 – 7.34 (m, 2H), 7.29 (m,  $J = 7.7, 6.0$  Hz, 5H), 3.28 (s, 1H), 2.93 (t,  $J = 7.2$  Hz, 2H), 1.83 – 1.72 (m, 2H), 1.29 – 1.21 (m, 2H). **<sup>13</sup>C NMR** (100 MHz,  $CDCl_3$ )  $\delta$  148.5, 140.0, 135.7, 134.1, 133.7, 130.1, 129.4, 128.0, 122.1, 120.1, 36.0, 22.5, 14.5. **HRMS** (CI)  $m/z$  calcd for  $C_{21}H_{21}NO_3SSi$  ( $M$ )<sup>+</sup>: 395.1011, found 395.1012.

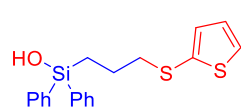

**diphenyl(3-(thiophen-2-ylthio)propyl)silanol (3m)**

**Yield:** 76% (108.6mg). (EA : PE = 1 : 20). Pale yellow oil. **IR** (neat,  $v$ ,  $cm^{-1}$ ): 3003, 1710, 1428, 1359, 1220, 1116, 870, 703, 529. **<sup>1</sup>H NMR** (400 MHz,  $CDCl_3$ )  $\delta$  7.60 – 7.47 (m, 4H), 7.42 – 7.35 (m, 2H), 7.35 – 7.28 (m, 4H), 7.22 (m,  $J = 5.3, 1.3$  Hz, 1H), 6.96 (m,  $J = 3.5, 1.3$  Hz, 1H), 6.86 (m,  $J = 5.4, 3.5$  Hz, 1H), 2.99 (s, 1H), 2.74 (t,  $J = 7.0$  Hz, 2H), 1.78 – 1.64 (m, 2H), 1.24 – 1.13 (m, 2H). **<sup>13</sup>C NMR** (100 MHz,  $CDCl_3$ )  $\delta$  135.9, 134.5, 134.3, 133.5, 130.0, 129.0, 128.0, 127.5, 42.1, 22.9, 14.0. **HRMS** (CI)  $m/z$  calcd for  $C_{19}H_{20}OS_2Si$  ( $M$ )<sup>+</sup>: 356.0725, found 356.0734.

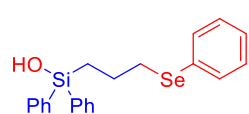

**diphenyl(3-(phenylselanyl)propyl)silanol (3n)**

**Yield:** 47% (71.1mg). (EA : PE = 1 : 20). Pale yellow oil. **IR** (neat, v,  $\text{cm}^{-1}$ ): 3003, 1710, 1428, 1358, 1220, 1092, 704, 529.  **$^1\text{H}$  NMR** (400 MHz,  $\text{CDCl}_3$ )  $\delta$  7.65 – 7.57 (m, 4H), 7.50 – 7.35 (m, 8H), 7.40 (m,  $J = 7.6$  Hz, 4H), 7.26 (m,  $J = 5.6, 3.7, 1.8$  Hz, 3H), 2.98 (t,  $J = 7.2$  Hz, 2H), 2.76 (s, 1H), 1.89 (dt,  $J = 15.3, 6.2$  Hz, 2H), 1.35 – 1.30 (m, 2H).  **$^{13}\text{C}$  NMR** (100 MHz,  $\text{CDCl}_3$ )  $\delta$  135.9, 134.2, 132.6, 130.4, 130.0, 129.1, 128.0, 126.8, 31.6, 23.8, 15.6. **HRMS** (CI)  $m/z$  calcd for  $\text{C}_{21}\text{H}_{22}\text{OSeSi}(\text{M})^+$ : 398.0605, found 398.0611.

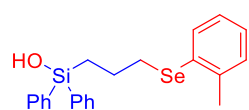

**diphenyl(3-(*o*-tolylselanyl)propyl)silanol (3o)**

**Yield:** 78% (128.9mg). (EA : PE = 1 : 20). Pale yellow oil. **IR** (neat, v,  $\text{cm}^{-1}$ ): 3002, 1710, 1428, 1358, 1220, 1092, 705, 529.  **$^1\text{H}$  NMR** (400 MHz,  $\text{CDCl}_3$ )  $\delta$  7.55 – 7.48 (m, 4H), 7.39 – 7.33 (m, 2H), 7.32 – 7.25 (m, 5H), 7.13 – 7.04 (m, 2H), 7.00 (m,  $J = 7.4, 1.9$  Hz, 1H), 2.85 (t,  $J = 7.3$  Hz, 3H), 2.33 (s, 3H), 1.86 – 1.74 (m, 2H), 1.26 – 1.18 (m, 2H).  **$^{13}\text{C}$  NMR** (100 MHz,  $\text{CDCl}_3$ )  $\delta$  139.2, 135.9, 134.2, 131.6, 131.2, 130.0, 129.9(8), 129.9(7), 128.0, 126.5, 30.3, 23.6, 22.4, 15.8.  **$^{77}\text{Se}$  NMR** (76 MHz,  $\text{CDCl}_3$ )  $\delta$  238.0.  **$^{29}\text{Si}$  NMR** (79 MHz,  $\text{CDCl}_3$ )  $\delta$  -4.35. **HRMS** (CI)  $m/z$  calcd for  $\text{C}_{22}\text{H}_{24}\text{OSeSi}(\text{M})^+$ : 412.0762, found 412.0760.

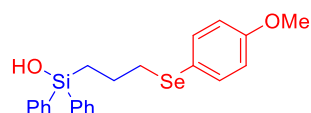

**3-((4-methoxyphenyl)selanyl)propyl)diphenylsilanol(3p)**

**Yield:** 68% (116.3mg). (EA : PE = 1 : 10). Pale yellow oil. **IR** (neat, v,  $\text{cm}^{-1}$ ): 3004, 1710, 1358, 1220, 705, 529.  **$^1\text{H}$  NMR** (400 MHz,  $\text{CDCl}_3$ )  $\delta$  7.57 – 7.48 (m, 4H), 7.40 – 7.34 (m, 3H), 7.34 – 7.27 (m, 5H), 6.75 – 6.68 (m, 2H), 3.72 (s, 3H), 2.80 (t,  $J = 7.1$  Hz, 3H), 1.80 – 1.68 (m, 2H), 1.25 – 1.17 (m, 2H).  **$^{13}\text{C}$  NMR** (100 MHz,  $\text{CDCl}_3$ )  $\delta$  159.2, 136.0, 135.6, 134.2, 130.0, 128.0, 120.0, 114.8, 55.3, 32.8, 23.7, 15.5.  **$^{77}\text{Se}$  NMR** (76 MHz,  $\text{CDCl}_3$ )  $\delta$  273.6. **HRMS** (CI)  $m/z$  calcd for  $\text{C}_{22}\text{H}_{24}\text{O}_2\text{SeSi}(\text{M})^+$ : 428.0711, found 428.0721.

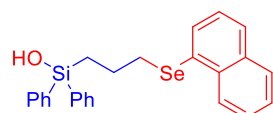

**3-(naphthalen-1-ylselanyl)propyl)diphenylsilanol (3q)**

**Yield:** 78% (139.2mg). (EA : PE = 1 : 20). Pale yellow oil. **IR** (neat, v,  $\text{cm}^{-1}$ ): 3003, 1710, 1358, 1220, 745, 529.  **$^1\text{H}$  NMR** (400 MHz,  $\text{CDCl}_3$ )  $\delta$  8.33 (m,  $J = 8.5, 3.4$  Hz, 1H), 7.75 (m,  $J = 7.6, 2.1$  Hz, 1H), 7.67 (m,  $J = 8.2, 2.1$  Hz, 1H), 7.60 (m,  $J = 7.3, 1.7$  Hz, 1H), 7.52 – 7.38 (m, 6H), 7.36 – 7.28 (m, 2H), 7.24 (m,  $J = 7.2, 1.7$  Hz, 5H), 2.87 (t,  $J = 7.1$  Hz, 3H), 1.73 (ddt,  $J = 9.3, 7.0, 4.8$  Hz, 2H), 1.22 – 1.13 (m, 2H).  **$^{13}\text{C}$  NMR** (100 MHz,  $\text{CDCl}_3$ )  $\delta$  135.9, 134.3, 134.2, 134.0, 132.0, 130.0, 129.6, 128.7, 128.1, 128.0, 127.6, 126.6, 126.2, 125.8, 31.9, 23.7, 15.6.  **$^{77}\text{Se}$  NMR** (76 MHz,  $\text{CDCl}_3$ )  $\delta$  223.5. **HRMS** (CI)  $m/z$  calcd for  $\text{C}_{25}\text{H}_{24}\text{OSeSi}(\text{M})^+$ : 448.0762, found 448.0764.

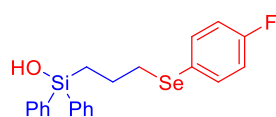

**(3-((4-fluorophenyl)selanyl)propyl)diphenylsilanol (3r)**

**Yield:** 72% (120.6mg). (EA : PE = 1 : 20). Pale yellow oil. **IR** (neat, v,  $\text{cm}^{-1}$ ): 3002, 1710, 1359, 1219, 1115, 868, 829, 702, 509.  **$^1\text{H}$  NMR** (400 MHz,  $\text{CDCl}_3$ )  $\delta$  7.54 – 7.49 (m, 4H), 7.41 – 7.28 (m, 8H), 6.86 (m,  $J = 8.7$  Hz, 2H), 2.89 (t,  $J = 7.1$  Hz, 1H), 2.82 (t,  $J = 7.2$  Hz, 2H), 1.80 – 1.69 (m, 2H), 1.25 – 1.15 (m, 2H).  **$^{13}\text{C}$  NMR** (100 MHz,  $\text{CDCl}_3$ )  $\delta$  162.3 ( $J = 244.9$  Hz), 135.9, 135.3 ( $J = 7.9$  Hz), 134.2, 130.1, 129.0 ( $J = 25.3$  Hz), 128.0, 116.2 ( $J = 21.1$  Hz), 32.5, 23.7, 15.5.  **$^{77}\text{Se}$  NMR** (76 MHz,  $\text{CDCl}_3$ )  $\delta$  282.3. **HRMS** (CI)  $m/z$  calcd for  $\text{C}_{21}\text{H}_{21}\text{OFSeSi}$  ( $\text{M}$ )<sup>+</sup>: 416.0511, found 416.0520.

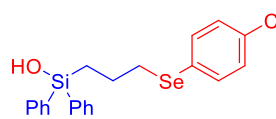

**(3-((4-chlorophenyl)selanyl)propyl)diphenylsilanol (3s)**

**Yield:** 57% (98.3mg). (EA : PE = 1 : 20). Pale yellow oil. **IR** (neat, v,  $\text{cm}^{-1}$ ): 3002, 1709, 1428, 1359, 1220, 1090, 869, 704, 529.  **$^1\text{H}$  NMR** (400 MHz,  $\text{CDCl}_3$ )  $\delta$  7.51 (m,  $J = 7.7, 1.1$  Hz, 4H), 7.42 – 7.35 (m, 2H), 7.35 – 7.23 (m, 6H), 7.15 – 7.09 (m, 2H), 2.85 (t,  $J = 7.2$  Hz, 3H), 1.81 – 1.73 (m, 2H), 1.25 – 1.16 (m, 2H).  **$^{13}\text{C}$  NMR** (100 MHz,  $\text{CDCl}_3$ )  $\delta$  135.8, 134.2, 134.1, 132.9, 130.1, 129.2, 128.4, 128.1, 31.9, 23.7, 15.6.  **$^{77}\text{Se}$  NMR** (76 MHz,  $\text{CDCl}_3$ )  $\delta$  285.6. **HRMS** (CI)  $m/z$  calcd for  $\text{C}_{21}\text{H}_{21}\text{OClSeSi}$  ( $\text{M}$ )<sup>+</sup>: 432.0215, found 432.0221.

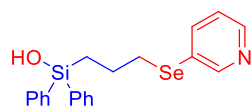

**diphenyl(3-(pyridin-3-ylselanyl)propyl)silanol (3t)**

**Yield:** 39% (62.5mg). (EA : PE = 1 : 10). Pale yellow oil. **IR** (neat, v,  $\text{cm}^{-1}$ ): 3002, 1709, 1414, 1220, 1111, 701, 529.  **$^1\text{H}$  NMR** (400 MHz,  $\text{CDCl}_3$ )  $\delta$  8.41 (m,  $J = 5.0, 1.9, 0.9$  Hz, 1H), 7.66 – 7.56 (m, 4H), 7.45 – 7.24 (m, 8H), 6.98 (m,  $J = 7.3, 5.0, 1.2$  Hz, 1H), 5.56 (s, 1H), 3.27 – 3.12 (m, 2H), 2.01 (p,  $J = 7.3$  Hz, 2H), 1.31 (t,  $J = 7.3$  Hz, 2H).  **$^{13}\text{C}$  NMR** (100 MHz,  $\text{CDCl}_3$ )  $\delta$  155.6, 149.9, 137.0, 136.3, 134.2, 129.7, 127.9, 126.0, 120.4, 27.9, 27.9, 24.8, 14.9.  **$^{77}\text{Se}$  NMR** (76 MHz,  $\text{CDCl}_3$ )  $\delta$  348.8. **HRMS** (CI)  $m/z$  calcd for  $\text{C}_{20}\text{H}_{21}\text{OSeSiN}$  ( $\text{M}$ )<sup>+</sup>: 399.0558 found 399.0563.

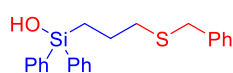

**(3-(benzylthio)propyl)diphenylsilanol (5a)**

**Yield:** 56% (80.9mg). (EA : PE = 1 : 20). Pale yellow oil. **IR** (neat, v,  $\text{cm}^{-1}$ ): 3002, 1710, 1428, 1359, 1220, 1092, 703, 529.  **$^1\text{H}$  NMR** (400 MHz,  $\text{CDCl}_3$ )  $\delta$  7.66 – 7.61 (m, 4H), 7.48 – 7.40 (m, 6H), 7.36 – 7.27 (m, 5H), 3.67 (s, 2H), 2.87 (s, 1H), 2.49 (t,  $J = 7.2$  Hz, 2H), 1.81 – 1.71 (m, 2H), 1.29 – 1.22 (m, 2H).  **$^{13}\text{C}$  NMR** (100 MHz,  $\text{CDCl}_3$ )  $\delta$  138.6, 136.0, 134.2, 130.0, 128.9, 128.5, 128.0, 127.0, 36.0, 34.6, 22.8, 14.5. **HRMS** (CI)  $m/z$  calcd for  $\text{C}_{22}\text{H}_{24}\text{SSi}$  ( $\text{M}$ )<sup>+</sup>: 364.1317 found 364.1323.

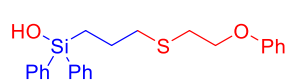

**(3-((2-phenoxyethyl)thio)propyl)diphenylsilanol (5b)**

**Yield:** 68% (107.5mg). (EA : PE = 1 : 20). Pale yellow oil. **IR** (neat,  $\nu$ ,  $\text{cm}^{-1}$ ): 3004, 1710, 1420, 1358, 1220, 1092, 705, 529.  **$^1\text{H NMR}$**  (400 MHz,  $\text{CDCl}_3$ )  $\delta$  7.71 – 7.64 (m, 4H), 7.51 – 7.41 (m, 6H), 7.38 – 7.32 (m, 2H), 7.04 (m,  $J = 7.3$  Hz, 1H), 6.98 – 6.91 (m, 2H), 4.13 (t,  $J = 6.9$  Hz, 2H), 3.24 (s, 1H), 2.87 (t,  $J = 6.9$  Hz, 2H), 2.69 (t,  $J = 7.2$  Hz, 2H), 1.88 – 1.79 (m, 2H), 1.35 – 1.27 (m, 2H).  **$^{13}\text{C NMR}$**  (100 MHz,  $\text{CDCl}_3$ )  $\delta$  158.4, 136.0, 134.2, 130.0, 129.5, 128.0, 121.0, 114.6, 67.7, 35.9, 30.8, 23.4, 14.5. **HRMS** (CI)  $m/z$  calcd for  $\text{C}_{23}\text{H}_{26}\text{O}_2\text{SSi}$  ( $\text{M}^+$ ): 394.1423 found 394.1416.

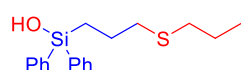

**diphenyl(3-(propylthio)propyl)silanol (5c)**

**Yield:** 24% (30.8mg). (EA : PE = 1 : 20). Pale yellow oil. **IR** (neat,  $\nu$ ,  $\text{cm}^{-1}$ ): 3004, 1709, 1419, 1359, 1220, 529.  **$^1\text{H NMR}$**  (400 MHz,  $\text{CDCl}_3$ )  $\delta$  7.67 – 7.61 (m, 4H), 7.47 – 7.38 (m, 6H), 2.97 (s, 1H), 2.57 (t,  $J = 7.1$  Hz, 2H), 2.47 – 2.40 (m, 2H), 1.82 – 1.72 (m, 2H), 1.59 (h,  $J = 7.4$  Hz, 2H), 1.31 – 1.26 (m, 2H), 0.98 (t,  $J = 7.4$  Hz, 3H).  **$^{13}\text{C NMR}$**  (100 MHz,  $\text{CDCl}_3$ )  $\delta$  136.1, 134.3, 130.0, 128.0, 35.4, 34.1, 23.3, 23.1, 14.6, 13.6.  **$^{29}\text{Si NMR}$**  (79 MHz,  $\text{CDCl}_3$ )  $\delta$  -4.10. **HRMS** (CI)  $m/z$  calcd for  $\text{C}_{18}\text{H}_{24}\text{OSSi}$  ( $\text{M}^+$ ): 316.1317 found 316.1306.

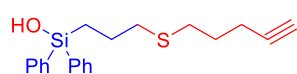

**(3-(pent-4-yn-1-ylthio)propyl)diphenylsilanol (5d)**

**Yield:** 42% (57.1mg). (EA : PE = 1 : 20). Pale yellow oil. **IR** (neat,  $\nu$ ,  $\text{cm}^{-1}$ ): 3004, 1709, 1358, 1220, 1092, 529.  **$^1\text{H NMR}$**  (400 MHz,  $\text{CDCl}_3$ )  $\delta$  7.65 – 7.60 (m, 4H), 7.48 – 7.38 (m, 6H), 2.64 (s, 1H), 2.57 (td,  $J = 7.2, 1.8$  Hz, 4H), 2.30 (td,  $J = 7.0, 2.6$  Hz, 2H), 1.96 (t,  $J = 2.7$  Hz, 1H), 1.77 (pd,  $J = 7.2, 3.3$  Hz, 4H), 1.31 – 1.26 (m, 2H).  **$^{13}\text{C NMR}$**  (100 MHz,  $\text{CDCl}_3$ )  $\delta$  136.1, 134.3, 130.1, 128.1, 83.7, 69.0, 35.4, 30.7, 28.4, 23.3, 17.6, 14.6. **HRMS** (CI)  $m/z$  calcd for  $\text{C}_{20}\text{H}_{24}\text{OSSi}$  ( $\text{M}^+$ ): 340.1317 found 340.1327.

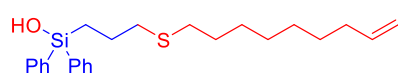

**(3-(non-8-en-1-ylthio)propyl)diphenylsilanol (5e)**

**Yield:** 49% (77.7mg). (EA : PE = 1 : 20). Pale yellow oil. **IR** (neat,  $\nu$ ,  $\text{cm}^{-1}$ ): 3004, 1709, 1359, 1221, 705, 529.  **$^1\text{H NMR}$**  (400 MHz,  $\text{CDCl}_3$ )  $\delta$  7.68 – 7.62 (m, 4H), 7.48 – 7.44 (m, 1H), 7.44 (m,  $J = 1.7$  Hz, 1H), 7.41 (m,  $J = 7.8, 6.1$  Hz, 4H), 5.86 (ddt,  $J = 16.9, 10.2, 6.7$  Hz, 1H), 5.08 – 4.96 (m, 2H), 2.95 (s, 1H), 2.57 (t,  $J = 7.1$  Hz, 2H), 2.49 – 2.42 (m, 2H), 2.09 (tdd,  $J = 6.6, 5.3, 1.4$  Hz, 2H), 1.83 – 1.74 (m, 2H), 1.60 – 1.52 (m, 2H), 1.47 – 1.40 (m, 2H), 1.40 – 1.32 (m, 6H), 1.31 – 1.28 (m, 2H).  **$^{13}\text{C NMR}$**  (100 MHz,  $\text{CDCl}_3$ )  $\delta$  139.2, 136.1, 134.3, 130.0, 128.0, 114.3, 35.5, 33.9, 32.0, 29.7, 29.2, 29.1, 29.0, 28.9, 23.2, 14.6. **HRMS** (CI)  $m/z$  calcd for  $\text{C}_{24}\text{H}_{34}\text{OSSi}$  ( $\text{M}^+$ ): 398.2100 found 398.2093.

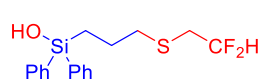

**(3-((2,2-difluoroethyl)thio)propyl)diphenylsilanol (5f)**

**Yield:** 32% (42.6mg). (EA : PE = 1 : 20). Pale yellow oil. **IR** (neat, v,  $\text{cm}^{-1}$ ): 3004, 1710, 1419, 1358, 1220, 1092, 529.  **$^1\text{H}$  NMR** (400 MHz,  $\text{CDCl}_3$ )  $\delta$  7.55 – 7.48 (m, 4H), 7.37 – 7.26 (m, 6H), 5.92 – 5.50 (m, 1H), 2.67 (td,  $J = 15.6, 4.6$  Hz, 2H), 2.58 – 2.51 (m, 2H), 1.70 – 1.62 (m, 2H), 1.18 – 1.13 (m, 2H).  **$^{13}\text{C}$  NMR** (100 MHz,  $\text{CDCl}_3$ )  $\delta$  135.9, 134.3, 130.2, 128.1, 116.7 (t,  $J = 241.5$  Hz), 36.1, 34.6 (t,  $J = 23.8$  Hz), 23.2, 14.4. **HRMS** (CI)  $m/z$  calcd for  $\text{C}_{17}\text{H}_{20}\text{OSSiF}_2$  ( $\text{M}^+$ ): 338.0972 found 338.0969.

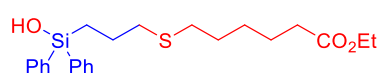

**ethyl 6-((3-(hydroxydiphenylsilyl)propyl)thio)hexanoate (5g)**

**Yield:** 42% (70.3mg). (EA : PE = 1 : 10). Pale yellow oil. **IR** (neat, v,  $\text{cm}^{-1}$ ): 3069, 2930, 1731, 1710, 1428, 1362, 1220, 1114, 864, 701, 509.  **$^1\text{H}$  NMR** (400 MHz,  $\text{CDCl}_3$ )  $\delta$  7.65 – 7.60 (m, 4H), 7.43 – 7.36 (m, 6H), 4.13 (q,  $J = 7.1$  Hz, 2H), 3.10 – 2.71 (m, 1H), 2.55 (t,  $J = 7.2$  Hz, 2H), 2.44 (t,  $J = 7.3$  Hz, 2H), 2.30 (t,  $J = 7.5$  Hz, 2H), 1.81 – 1.71 (m, 2H), 1.66 – 1.60 (m, 2H), 1.55 (q,  $J = 7.7$  Hz, 2H), 1.43 – 1.36 (m, 2H), 1.29 – 1.25 (m, 5H).  **$^{13}\text{C}$  NMR** (100 MHz,  $\text{CDCl}_3$ )  $\delta$  173.9, 136.3, 134.2, 129.9, 127.9, 60.4, 35.4, 34.2, 31.7, 29.3, 28.3, 24.6, 23.3, 14.6, 14.3. **HRMS** (CI)  $m/z$  calcd for  $\text{C}_{23}\text{H}_{32}\text{O}_3\text{SSi}$  ( $\text{M}^+$ ): 416.1841 found 416.1837.

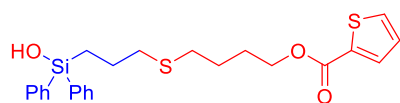

**1-(4-((3-(hydroxydiphenylsilyl)propyl)thio)butyl)thiophene-2-carboxylate (5h)**

**Yield:** 42% (84.7mg). (EA : PE = 1 : 10). Pale yellow oil. **IR** (neat, v,  $\text{cm}^{-1}$ ): 3002, 2924, 1706, 1419, 1359, 1221, 1096, 861, 703, 510.  **$^1\text{H}$  NMR** (400 MHz,  $\text{CDCl}_3$ )  $\delta$  7.76 (m,  $J = 3.7, 1.3$  Hz, 1H), 7.66 – 7.54 (m, 4H), 7.50 (m,  $J = 5.0, 1.3$  Hz, 1H), 7.43 – 7.29 (m, 6H), 7.05 (m,  $J = 5.0, 3.8$  Hz, 1H), 4.24 (t,  $J = 6.4$  Hz, 2H), 3.22 (s, 1H), 2.52 (t,  $J = 7.2$  Hz, 2H), 2.46 (t,  $J = 7.3$  Hz, 2H), 1.84 – 1.68 (m, 4H), 1.68 – 1.59 (m, 2H), 1.25 – 1.19 (m, 2H).  **$^{13}\text{C}$  NMR** (100 MHz,  $\text{CDCl}_3$ )  $\delta$  162.5, 136.2, 134.2, 133.8, 133.6, 132.5, 129.9, 128.0, 127.8, 64.8, 35.3, 31.4, 27.9, 26.0, 23.2, 14.6. **HRMS** (CI)  $m/z$  calcd for  $\text{C}_{24}\text{H}_{28}\text{O}_3\text{S}_2\text{Si}$  ( $\text{M}^+$ ): 456.1249 found 456.1239.

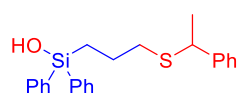

**diphenyl(3-((1-phenylethyl)thio)propyl)silanol (5j)**

**Yield:** 89% (111.2mg). (EA : PE = 1 : 20). Pale yellow oil. **IR** (neat, v,  $\text{cm}^{-1}$ ): 3003, 1709, 1359, 1220, 1115, 871, 702, 529.  **$^1\text{H}$  NMR** (400 MHz,  $\text{CDCl}_3$ )  $\delta$  7.55 – 7.52 (m, 3H), 7.39 – 7.35 (m, 2H), 7.35 – 7.29 (m, 4H), 7.25 – 7.21 (m, 3H), 7.18 (ddd,  $J = 9.2, 4.4, 2.4$  Hz, 1H), 3.81 (q,  $J = 7.0$  Hz, 1H), 2.77 (s, 1H), 2.37 – 2.21 (m, 2H), 1.69 – 1.53 (m, 2H), 1.49 (d,  $J = 7.1$  Hz, 3H), 1.18 – 1.04 (m, 2H).  **$^{13}\text{C}$  NMR** (100 MHz,  $\text{CDCl}_3$ )  $\delta$  144.1, 136.1, 134.2, 130.0, 128.5, 128.0, 127.3, 127.0, 43.9, 34.6, 23.0, 22.7, 14.6. **HRMS** (CI)  $m/z$  calcd for  $\text{C}_{23}\text{H}_{36}\text{OSSi}$  ( $\text{M}^+$ ): 378.1474 found 378.1475.

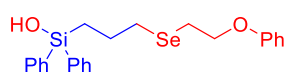

**(3-((2-phenoxyethyl)selanyl)propyl)diphenylsilanol (5m)**

**Yield:** 64% (113.0mg). (EA : PE = 1 : 20). Pale yellow oil. **IR** (neat, v,  $\text{cm}^{-1}$ ): 3004, 1709, 1428, 1359, 1220, 705, 529.  **$^1\text{H}$  NMR** (400 MHz,  $\text{CDCl}_3$ )  $\delta$  7.56 (m,  $J = 8.0, 1.6$  Hz, 4H), 7.39 – 7.29 (m, 6H), 7.26 – 7.21 (m, 2H), 6.94 – 6.89 (m, 1H), 6.86 – 6.80 (m, 2H), 4.09 (t,  $J = 7.2$  Hz, 2H), 2.77 (t,  $J = 7.2$  Hz, 2H), 2.64 (t,  $J = 7.3$  Hz, 2H), 1.86 – 1.74 (m, 2H), 1.25 – 1.19 (m, 2H).  **$^{13}\text{C}$  NMR** (100 MHz,  $\text{CDCl}_3$ )  $\delta$  158.4, 136.1, 134.2, 130.0, 129.6, 128.0, 121.0, 114.7, 68.4, 28.4, 24.4, 22.0, 15.8.  **$^{77}\text{Se}$  NMR** (76 MHz,  $\text{CDCl}_3$ )  $\delta$  137.6. **HRMS** (CI)  $m/z$  calcd for  $\text{C}_{23}\text{H}_{26}\text{O}_2\text{SeSi}$  ( $\text{M}$ ) $^+$ : 442.0867 found 442.0873.

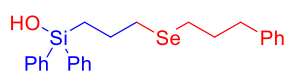

**diphenyl(3-((3-phenylpropyl)selanyl)propyl)silanol (5n)**

**Yield:** 65% (114.6mg). (EA : PE = 1 : 20). Pale yellow oil. **IR** (neat, v,  $\text{cm}^{-1}$ ): 3003, 1709, 1428, 1359, 1220, 703, 529.  **$^1\text{H}$  NMR** (400 MHz,  $\text{CDCl}_3$ )  $\delta$  7.55 – 7.46 (m, 4H), 7.36 – 7.25 (m, 6H), 7.18 (m,  $J = 8.0, 6.6$  Hz, 2H), 7.13 – 7.04 (m, 3H), 2.61 – 2.56 (m, 2H), 2.54 – 2.39 (m, 4H), 1.84 (p,  $J = 7.5$  Hz, 2H), 1.75 – 1.66 (m, 2H), 1.56 (s, 1H), 1.19 – 1.14 (m, 2H).  **$^{13}\text{C}$  NMR** (100 MHz,  $\text{CDCl}_3$ )  $\delta$  141.6, 136.1, 134.3, 130.1, 128.6, 128.5, 128.1, 126.0, 36.0, 32.2, 27.7, 24.2, 23.3, 15.8.  **$^{77}\text{Se}$  NMR** (76 MHz,  $\text{CDCl}_3$ )  $\delta$  151.6. **HRMS** (CI)  $m/z$  calcd for  $\text{C}_{24}\text{H}_{28}\text{OSeSi}$  ( $\text{M}$ ) $^+$ : 440.1075 found 440.1074.

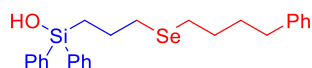

**diphenyl(3-((4-phenylbutyl)selanyl)propyl)silanol (5o)**

**Yield:** 66% (120.4mg). (EA : PE = 1 : 20). Pale yellow oil. **IR** (neat, v,  $\text{cm}^{-1}$ ): 3003, 1709, 1420, 1358, 1220, 704, 529.  **$^1\text{H}$  NMR** (400 MHz,  $\text{CDCl}_3$ )  $\delta$  7.56 – 7.49 (m, 4H), 7.35 – 7.26 (m, 6H), 7.20 – 7.16 (m, 2H), 7.12 – 7.04 (m, 3H), 2.54 – 2.36 (m, 6H), 1.71 (ddt,  $J = 12.1, 8.9, 6.1$  Hz, 2H), 1.62 – 1.52 (m, 4H), 1.17 (dd,  $J = 8.3, 2.9$  Hz, 2H).  **$^{13}\text{C}$  NMR** (100 MHz,  $\text{CDCl}_3$ )  $\delta$  142.4, 136.1, 134.3, 130.1, 128.5, 128.4, 128.1, 125.9, 35.5, 31.7, 30.3, 27.7, 24.2, 23.7, 15.8.  **$^{77}\text{Se}$  NMR** (76 MHz,  $\text{CDCl}_3$ )  $\delta$  153.3. **HRMS** (CI)  $m/z$  calcd for  $\text{C}_{26}\text{H}_{32}\text{OSeSi}$  ( $\text{M}$ ) $^+$ : 454.1231 found 454.1232.

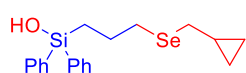

**(3-((cyclopropylmethyl)selanyl)propyl)diphenylsilanol (5p)**

**Yield:** 67% (101.0mg). (EA : PE = 1 : 20). Pale yellow oil. **IR** (neat, v,  $\text{cm}^{-1}$ ): 3004, 1710, 1428, 1358, 1220, 1092, 705, 529.  **$^1\text{H}$  NMR** (400 MHz,  $\text{CDCl}_3$ )  $\delta$  7.47 – 7.42 (m, 4H), 7.29 – 7.19 (m, 6H), 2.51 (d,  $J = 7.2$  Hz, 2H), 2.27 (d,  $J = 7.1$  Hz, 2H), 1.71 – 1.63 (m, 2H), 1.15 – 1.09 (m, 2H), 0.88 – 0.76 (m, 1H), 0.45 – 0.36 (m, 2H), -0.01 (dt,  $J = 6.1, 4.5$  Hz, 2H).  **$^{13}\text{C}$  NMR** (100 MHz,  $\text{CDCl}_3$ )  $\delta$  136.2, 134.3, 130.0, 128.1, 29.4, 27.6, 24.4, 15.9, 12.2, 6.8.  **$^{77}\text{Se}$  NMR** (76 MHz,  $\text{CDCl}_3$ )  $\delta$  168.0. **HRMS** (CI)  $m/z$  calcd for  $\text{C}_{19}\text{H}_{24}\text{OSeSi}$  ( $\text{M}$ ) $^+$ : 376.0762 found

376.0768.

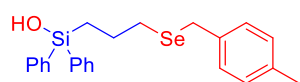

**(3-((4-methylbenzyl)selenyl)propyl)diphenylsilanol (5q)**

**Yield:** 72% (121.9mg). (EA : PE = 1 : 20). Pale yellow oil. **IR** (neat, v,  $\text{cm}^{-1}$ ): 3004, 1709, 1421, 1358, 1220, 529.  **$^1\text{H}$  NMR** (400 MHz,  $\text{CDCl}_3$ )  $\delta$  7.52 – 7.47 (m, 4H), 7.36 – 7.24 (m, 6H), 7.03 – 6.94 (m, 4H), 3.57 (s, 2H), 2.44 (d,  $J = 7.2$  Hz, 2H), 2.38 (s, 1H), 2.22 (s, 3H), 1.73 – 1.62 (m, 2H), 1.15 – 1.08 (m, 2H).  **$^{13}\text{C}$  NMR** (100 MHz,  $\text{CDCl}_3$ )  $\delta$  136.5, 136.3, 136.1, 134.3, 130.1, 129.3, 128.8, 128.1, 27.7, 26.7, 23.9, 21.2, 15.8.  **$^{77}\text{Se}$  NMR** (76 MHz,  $\text{CDCl}_3$ )  $\delta$  245.8.  **$^{29}\text{Si}$  NMR** (79 MHz,  $\text{CDCl}_3$ )  $\delta$  -4.31. **HRMS** (CI)  $m/z$  calcd for  $\text{C}_{23}\text{H}_{26}\text{OSeSi}$  ( $\text{M}$ ) $^+$ : 426.0918 found 426.0921.

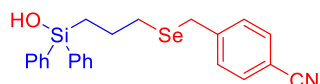

**4-(((3-**

**(hydroxydiphenylsilyl)propyl)selenyl)methyl)benzonitrile (5r)**

**Yield:** 45% (79.5mg). (EA : PE = 1 : 10). Pale yellow oil. **IR** (neat, v,  $\text{cm}^{-1}$ ): 3003, 2228, 1710, 1427, 1358, 1220, 704, 529.  **$^1\text{H}$  NMR** (400 MHz,  $\text{CDCl}_3$ )  $\delta$  7.53 – 7.47 (m, 4H), 7.44 – 7.40 (m, 2H), 7.38 – 7.28 (m, 6H), 7.21 – 7.17 (m, 2H), 3.60 (s, 2H), 2.44 (t,  $J = 7.3$  Hz, 2H), 1.98 (s, 1H), 1.74 – 1.62 (m, 2H), 1.15 – 1.07 (m, 2H).  **$^{13}\text{C}$  NMR** (100 MHz,  $\text{CDCl}_3$ )  $\delta$  145.6, 136.0, 134.2, 132.4, 130.2, 129.6, 128.1, 119.0, 110.4, 28.0, 26.3, 23.9, 15.8.  **$^{77}\text{Se}$  NMR** (76 MHz,  $\text{CDCl}_3$ )  $\delta$  263.3. **HRMS** (CI)  $m/z$  calcd for  $\text{C}_{23}\text{H}_{23}\text{ONSi}$  ( $\text{M}$ ) $^+$ : 437.0714 found 437.0706.

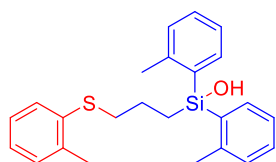

**di-*o*-tolyl(3-(*o*-tolylthio)propyl)silanol (6a)**

**Yield:** 57% (90.2mg). (EA : PE = 1 : 20). Pale yellow oil. **IR** (neat, v,  $\text{cm}^{-1}$ ): 3005, 1710, 1420, 1359, 1220, 1112, 529.  **$^1\text{H}$  NMR** (400 MHz,  $\text{CDCl}_3$ )  $\delta$  7.47 (m,  $J = 7.4, 1.5$  Hz, 2H), 7.18 (m,  $J = 7.5, 1.5$  Hz, 2H), 7.06 (m,  $J = 7.8, 1.3$  Hz, 3H), 7.03 – 6.97 (m, 4H), 6.97 – 6.93 (m, 1H), 2.82 (t,  $J = 7.1$  Hz, 2H), 2.23 (s, 3H), 2.14 (s, 6H), 1.71 – 1.62 (m, 2H), 1.31 – 1.24 (m, 2H).  **$^{13}\text{C}$  NMR** (100 MHz,  $\text{CDCl}_3$ )  $\delta$  143.7, 137.4, 136.0, 135.2, 135.1, 130.1, 130.1, 130.1, 127.7, 126.4, 125.5, 125.2, 36.1, 23.0, 22.9, 20.4, 15.3. **HRMS** (CI)  $m/z$  calcd for  $\text{C}_{24}\text{H}_{28}\text{OSSi}$  ( $\text{M}$ ) $^+$ : 392.1630 found 392.1638.

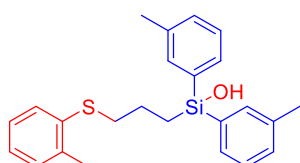

**di-*m*-tolyl(3-(*o*-tolylthio)propyl)silanol (6b)**

**Yield:** 64% (100.8mg). (EA : PE = 1 : 20). Pale yellow oil. **IR** (neat, v,  $\text{cm}^{-1}$ ): 3004, 1709, 1359, 1220, 705, 529.  **$^1\text{H}$  NMR** (400 MHz,  $\text{CDCl}_3$ )  $\delta$  7.49 (s, 2H), 7.45 (m,  $J = 6.8$  Hz, 2H), 7.36 – 7.28 (m, 4H), 7.25 (m,  $J = 7.6, 1.6$  Hz, 1H), 7.20 (m,  $J = 11.9, 7.2, 1.9$  Hz, 2H), 7.16 – 7.11 (m, 1H), 3.00 (t,  $J = 7.2$  Hz, 2H), 2.42 (d,  $J = 4.8$  Hz, 10H), 1.97 – 1.85 (m, 2H), 1.41 – 1.35 (m, 2H).  **$^{13}\text{C}$  NMR** (100 MHz,  $\text{CDCl}_3$ )

$\delta$  137.4, 137.3, 136.1, 135.9, 134.8, 131.3, 130.8, 130.1, 128.0, 127.6, 126.4, 125.4, 36.1, 22.9, 21.6, 20.4, 14.8. **HRMS** (CI)  $m/z$  calcd for  $C_{24}H_{28}OSSi$  ( $M$ )<sup>+</sup>: 392.1630 found 392.1638.

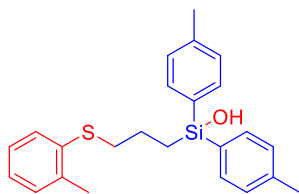

**di-*p*-tolyl(3-(*o*-tolylthio)propyl)silanol (6c)**

**Yield:** 71% (111.0mg). (EA : PE = 1 : 20). Pale yellow oil.

**IR** (neat,  $\nu$ ,  $cm^{-1}$ ): 3005, 1710, 1359, 1220, 1092, 803, 529.

**<sup>1</sup>H NMR** (400 MHz,  $CDCl_3$ )  $\delta$  7.33 (m,  $J = 7.9$  Hz, 4H), 7.07 – 7.00 (m, 6H), 6.95 (m,  $J = 8.8, 7.1, 1.8$  Hz, 2H), 2.77 (t,  $J = 7.2$  Hz, 2H), 2.50 (s, 1H), 2.23 (s, 6H), 2.22 (s, 3H), 1.68 (ddt,  $J = 11.9, 8.7, 6.2$  Hz, 2H), 1.17 – 1.10 (m, 2H). **<sup>13</sup>C NMR** (100 MHz,  $CDCl_3$ )  $\delta$  139.9, 137.3, 136.2, 134.3, 132.6, 130.1, 128.8, 127.6, 126.4, 125.4, 36.1, 22.9, 21.6, 20.4, 14.9. **<sup>29</sup>Si NMR** (79 MHz,  $CDCl_3$ )  $\delta$  -4.02. **HRMS** (CI)  $m/z$  calcd for  $C_{24}H_{28}OSSi$  ( $M$ )<sup>+</sup>: 392.1630 found 392.1636.

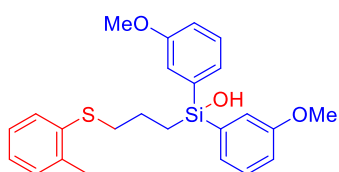

**bis(3-methoxyphenyl)(3-(*o*-tolylthio)propyl)silanol (6d)**

**Yield:** 53% (89.3mg). (EA : PE = 1 : 10). Pale yellow oil.

**IR** (neat,  $\nu$ ,  $cm^{-1}$ ): 3004, 1710, 1418, 1359, 1220, 1046, 701, 529. **<sup>1</sup>H NMR** (400 MHz,  $CDCl_3$ )  $\delta$  7.20 – 7.15 (m,

2H), 7.03 (m,  $J = 7.1, 5.8, 1.7$  Hz, 6H), 6.99 – 6.91 (m, 2H), 6.82 (m,  $J = 8.2, 2.7, 1.1$  Hz, 2H), 3.64 (s, 6H), 2.79 (t,  $J = 7.2$  Hz, 2H), 2.22 (s, 3H), 1.76 – 1.65 (m, 2H), 1.20 – 1.14 (m, 2H). **<sup>13</sup>C NMR** (100 MHz,  $CDCl_3$ )  $\delta$  159.1, 137.5, 137.3, 136.0, 130.1, 129.3, 127.6, 126.5, 126.4, 125.4, 119.4, 115.6, 55.2, 36.0, 22.8, 20.4, 14.7. **HRMS** (CI)  $m/z$  calcd for  $C_{24}H_{28}O_3SSi$  ( $M$ )<sup>+</sup>: 424.1528 found 424.1535.

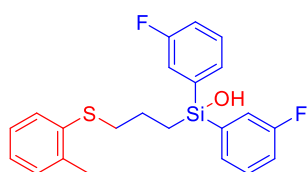

**bis(3-fluorophenyl)(3-(*o*-tolylthio)propyl)silanol (6e)**

**Yield:** 60% (96.3mg). (EA : PE = 1 : 20). Pale yellow oil. **IR**

(neat,  $\nu$ ,  $cm^{-1}$ ): 3004, 1710, 1416, 1358, 1219, 529. **<sup>1</sup>H NMR** (400 MHz,  $CDCl_3$ )  $\delta$  7.26 – 7.16 (m, 4H), 7.12 (m,  $J = 8.8, 2.8$  Hz, 2H), 7.09 – 6.92 (m, 6H), 2.80 (t,  $J = 7.1$  Hz, 2H),

2.59 (s, 1H), 2.23 (s, 3H), 1.75 – 1.59 (m, 2H), 1.23 – 1.13 (m, 2H). **<sup>13</sup>C NMR** (100 MHz,  $CDCl_3$ )  $\delta$  162.7 ( $J = 247.1$  Hz), 138.4 ( $J = 4.3$  Hz), 137.6, 135.6, 130.2, 130.1, 130.1, 129.7 ( $J = 3.0$  Hz), 127.9, 126.1 ( $J = 73.4$  Hz), 120.5 ( $J = 18.8$  Hz), 117.3 ( $J = 20.9$  Hz), 36.0, 22.6, 20.4, 14.4. **HRMS** (CI)  $m/z$  calcd for  $C_{22}H_{22}OF_2SSi$  ( $M$ )<sup>+</sup>: 400.1129 found 400.1135.



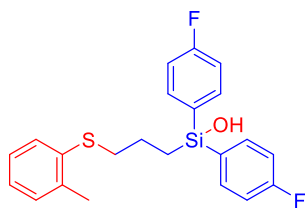

**bis(4-fluorophenyl)(3-(*o*-tolylthio)propyl)silanol (6f)**

**Yield:** 64% (103.1mg). (EA : PE = 1 : 20). Pale yellow oil. **IR** (neat,  $\nu$ ,  $\text{cm}^{-1}$ ): 3004, 1710, 1420, 1358, 1220, 1092, 824, 528.  **$^1\text{H NMR}$**  (400 MHz,  $\text{CDCl}_3$ )  $\delta$  7.43 – 7.34 (m, 4H), 7.07 – 7.01 (m, 2H), 7.01 – 6.88 (m, 6H), 2.79 (t,  $J = 7.1$  Hz, 2H), 2.54 (s, 1H), 2.22 (s, 3H), 1.65 (ddt,  $J = 11.2, 8.6, 6.2$  Hz, 2H), 1.19 – 1.12 (m, 2H).  **$^{13}\text{C NMR}$**  (100 MHz,  $\text{CDCl}_3$ )  $\delta$  164.4 ( $J = 248.4$  Hz), 137.5, 136.3, 136.3, 135.7, 131.3 ( $J = 3.7$  Hz), 130.2, 127.8, 126.1 ( $J = 76.5$  Hz), 115.4 ( $J = 19.6$  Hz), 36.0, 22.7, 20.4, 14.7. **HRMS** (CI)  $m/z$  calcd for  $\text{C}_{22}\text{H}_{22}\text{OF}_2\text{SSi}$  ( $\text{M}^+$ ): 400.1129 found 400.1139.

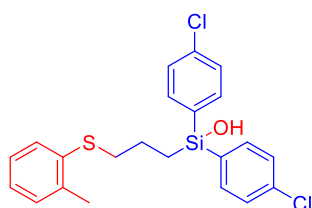

**bis(4-chlorophenyl)(3-(*o*-tolylthio)propyl)silanol (6g)**

**Yield:** 69% (118.6mg). (EA : PE = 1 : 20). Pale yellow oil. **IR** (neat,  $\nu$ ,  $\text{cm}^{-1}$ ): 3004, 1710, 1420, 1358, 1220, 1084, 529.  **$^1\text{H NMR}$**  (400 MHz,  $\text{CDCl}_3$ )  $\delta$  7.37 (m,  $J = 7.8$  Hz, 4H), 7.25 (m,  $J = 7.8$  Hz, 4H), 7.04 (m,  $J = 25.4, 5.8, 2.4$  Hz, 4H), 2.83 (t,  $J = 7.0$  Hz, 2H), 2.49 (s, 1H), 2.25 (s, 3H), 1.73 – 1.65 (m, 2H), 1.23 – 1.16 (m, 2H).  **$^{13}\text{C NMR}$**  (100 MHz,  $\text{CDCl}_3$ )  $\delta$  137.6, 136.7, 135.7, 135.6, 133.8, 130.3, 128.5, 128.0, 126.5, 125.8, 36.0, 22.6, 20.5, 14.5. **HRMS** (CI)  $m/z$  calcd for  $\text{C}_{22}\text{H}_{22}\text{OCl}_2\text{SSi}$  ( $\text{M}^+$ ): 432.0538 found 432.0544.

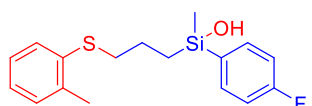

**(4-fluorophenyl)(methyl)(3-(*o*-tolylthio)propyl)silanol (6h)**

**Yield:** 32% (40.9mg). (EA : PE = 1 : 20). Pale yellow oil. **IR** (neat,  $\nu$ ,  $\text{cm}^{-1}$ ): 3004, 1710, 1358, 1220, 826, 529.  **$^1\text{H NMR}$**  (400 MHz,  $\text{CDCl}_3$ )  $\delta$  7.40 (m,  $J = 8.6, 6.2, 2.4$  Hz, 2H), 7.08 (m,  $J = 7.6, 1.5$  Hz, 1H), 7.05 – 6.90 (m, 5H), 2.78 (t,  $J = 7.2$  Hz, 2H), 2.23 (s, 3H), 1.91 (s, 1H), 1.66 – 1.57 (m, 2H), 0.88 (d,  $J = 16.7$  Hz, 2H), 0.25 (s, 3H).  **$^{13}\text{C NMR}$**  (100 MHz,  $\text{CDCl}_3$ )  $\delta$  164.2 ( $J = 247.6$  Hz), 137.5, 136.0, 135.4(2), 135.3(5), 133.6 ( $J = 3.7$  Hz), 130.2, 127.8, 126.0 ( $J = 83.2$  Hz), 115.2 ( $J = 19.5$  Hz), 115.1, 36.2, 22.9, 20.5, 16.3, -1.4. **HRMS** (CI)  $m/z$  calcd for  $\text{C}_{17}\text{H}_{21}\text{OFSSi}$  ( $\text{M}^+$ ): 320.1066 found 320.1073.

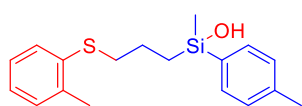

**methyl(*p*-tolyl)(3-(*o*-tolylthio)propyl)silanol (6i)**

**Yield:** 24% (30.0mg). (EA : PE = 1 : 20). Pale yellow oil. **IR** (neat,  $\nu$ ,  $\text{cm}^{-1}$ ): 3011, 1717, 1456, 1253, 1110.9, 848, 742, 555.  **$^1\text{H NMR}$**  (400 MHz,  $\text{CDCl}_3$ )  $\delta$  7.40 – 7.33 (m, 2H), 7.14 – 7.09 (m, 3H), 7.02 (m,  $J = 20.9, 7.1, 1.6$  Hz, 3H), 2.82 (t,  $J = 7.3$  Hz, 2H), 2.27 (d,  $J = 3.6$  Hz, 6H), 1.84 (s, 1H), 1.73 – 1.64 (m, 2H), 0.97 – 0.89 (m, 2H), 0.28 (s, 3H).  **$^{13}\text{C NMR}$**  (100 MHz,  $\text{CDCl}_3$ )  $\delta$  139.8, 137.5, 136.2, 134.4, 133.4, 130.2, 128.9, 127.7, 126.4, 125.5, 36.2, 23.0, 21.6, 20.5, 16.4, -1.5. **HRMS** (CI)  $m/z$  calcd for  $\text{C}_{18}\text{H}_{24}\text{OSSi}$  ( $\text{M}^+$ ): 316.1317 found 316.1321.

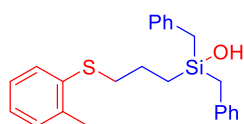

**dibenzyl(3-(*o*-tolylthio)propyl)silanol (6j)**

**Yield:** 56% (88.4mg). (EA : PE = 1 : 20). Pale yellow oil. **IR** (neat,  $\nu$ ,  $\text{cm}^{-1}$ ): 3003, 1709, 1359, 1220, 1092, 529.  **$^1\text{H NMR}$**  (400 MHz,  $\text{CDCl}_3$ )  $\delta$  7.29 (m,  $J = 7.6$  Hz, 5H), 7.25 – 7.14 (m, 5H), 7.11 – 7.05 (m, 4H), 2.90 (t,  $J = 7.3$  Hz, 2H), 2.43 (s, 3H), 2.24 (s, 4H), 1.90 (s, 1H), 1.77 – 1.67 (m, 2H), 0.85 – 0.69 (m, 2H).  **$^{13}\text{C NMR}$**  (100 MHz,  $\text{CDCl}_3$ )  $\delta$  138.2, 137.4, 136.0, 130.2, 128.6, 128.4, 127.6, 126.4, 125.5, 124.7, 36.0, 24.6, 22.7, 20.5, 13.7. **HRMS** (CI)  $m/z$  calcd for  $\text{C}_{24}\text{H}_{28}\text{OSSi}$  ( $\text{M}^+$ ): 392.1630 found 392.1628.

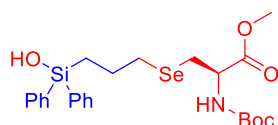

**methyl (*R*)-1-hydroxy-11,11-dimethyl-9-oxo-1,1-diphenyl-10-oxa-5-selena-8-aza-1-siladodecane-7-carboxylate (5s)**

**Yield:** 76% (154.1mg). (EA : PE = 1 : 10). Pale yellow oil. **IR** (neat,  $\nu$ ,  $\text{cm}^{-1}$ ): 3000, 2929, 1743, 1706, 1499, 1364, 1219, 1161, 1114, 1048, 858, 700, 507.  **$^1\text{H NMR}$**  (400 MHz,  $\text{CDCl}_3$ )  $\delta$  7.54 – 7.46 (m, 4H), 7.30 – 7.22 (m, 6H), 5.31 (d,  $J = 8.2$  Hz, 1H), 4.43 (q,  $J = 6.0$  Hz, 1H), 3.57 (s, 3H), 2.81 – 2.67 (m, 2H), 2.50 (td,  $J = 7.2, 2.9$  Hz, 2H), 1.72 – 1.63 (m, 2H), 1.32 (s, 9H), 1.15 – 1.08 (m, 2H).  **$^{13}\text{C NMR}$**  (100 MHz,  $\text{CDCl}_3$ )  $\delta$  171.8, 155.3, 136.4, 134.2, 129.8, 127.9, 80.4, 53.6, 52.6, 28.6, 28.4, 25.7, 24.0, 15.6.  **$^{77}\text{Se NMR}$**  (76 MHz,  $\text{CDCl}_3$ )  $\delta$  121.6. **HRMS** (CI)  $m/z$  calcd for  $\text{C}_{24}\text{H}_{33}\text{O}_5\text{NSeSi}$  ( $\text{M}^+$ ): 523.1293 found 523.1298.

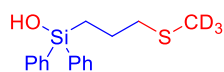

**3-((methyl-*d*<sub>3</sub>)thio)propyl)diphenylsilanol (5t)**

**Yield:** 61% (71.3mg). (EA : PE = 1 : 10). Pale yellow oil. **IR** (neat,  $\nu$ ,  $\text{cm}^{-1}$ ): 3001, 2922, 2127, 1705, 1428, 1360, 1220, 1114, 862, 701, 509.  **$^1\text{H NMR}$**  (400 MHz,  $\text{CDCl}_3$ )  $\delta$  7.65 – 7.55 (m, 4H), 7.41 – 7.32 (m, 6H), 3.04 (s, 1H), 2.48 (t,  $J = 7.1$  Hz, 2H), 1.77 – 1.66 (m, 2H), 1.25 – 1.18 (m, 2H).  **$^{13}\text{C NMR}$**  (100 MHz,  $\text{CDCl}_3$ )  $\delta$  136.1, 134.2, 130.0, 128.0, 37.4, 22.7, 14.4. **HRMS** (CI)  $m/z$  calcd for  $\text{C}_{16}\text{H}_{17}\text{OD}_3\text{SSi}$  ( $\text{M}^+$ ): 291.1192; found 291.1183.

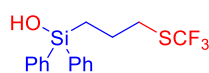

**diphenyl(3-((trifluoromethyl)thio)propyl)silanol (5u)**

**Yield:** 65% (44.5mg). (EA : PE = 1 : 20). Pale yellow oil. **IR** (neat,  $\nu$ ,  $\text{cm}^{-1}$ ): 3004, 1710, 1428, 1359, 1220, 1118, 873, 704, 529.  **$^1\text{H NMR}$**  (400 MHz,  $\text{CDCl}_3$ )  $\delta$  7.48 (m,  $J = 6.5, 1.6$  Hz, 4H), 7.36 – 7.26 (m, 6H), 2.79 (t,  $J = 7.2$  Hz, 2H), 2.53 (s, 1H), 1.79 – 1.68 (m, 2H), 1.16 – 1.09 (m, 2H).  **$^{13}\text{C NMR}$**  (100 MHz,  $\text{CDCl}_3$ )  $\delta$  135.6, 134.3, 131.2 (q,  $J = 284.5$  Hz), 130.3, 128.2, 33.1, 23.6, 14.5.  **$^{19}\text{F NMR}$**  (377 MHz,  $\text{CDCl}_3$ )  $\delta$  -40.9. **HRMS** (CI)  $m/z$  calcd for  $\text{C}_{16}\text{H}_{17}\text{F}_3\text{OSSi}$  ( $\text{M}^+$ ): 342.0721; found 342.0714.

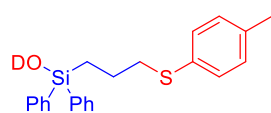

**diphenyl(3-(*p*-tolylthio)propyl)silanol-d (3c')**

**Yield:** 43% (63.2mg). (EA : PE = 1 : 20). D-inc. 100% (determined by  $^1\text{H NMR}$ ). Pale yellow oil. **IR** (neat,  $\nu$ ,  $\text{cm}^{-1}$ ): 3004, 1709, 1358, 1220, 529.  $^1\text{H NMR}$  (400 MHz,  $\text{CDCl}_3$ )  $\delta$  7.49 – 7.43 (m, 4H), 7.34 – 7.28 (m, 2H), 7.27 – 7.22 (m, 4H), 7.11 – 7.06 (m, 2H), 6.95 (m,  $J = 7.9$  Hz, 2H), 2.79 (t,  $J = 7.1$  Hz, 2H), 2.20 (s, 3H), 1.67 (ddt,  $J = 11.3, 8.7, 6.3$  Hz, 2H), 1.20 – 1.15 (m, 2H).  $^{13}\text{C NMR}$  (100 MHz,  $\text{CDCl}_3$ )  $\delta$  136.1, 136.0, 134.3, 132.7, 130.2, 130.0, 129.7, 128.0, 37.8, 22.9, 21.1, 14.5. **HRMS** (CI)  $m/z$  calcd for  $\text{C}_{22}\text{H}_{23}\text{ODSSi}$  ( $\text{M}^+$ ): 365.1380; found 365.1379.

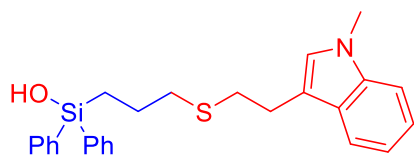

**(3-((2-(1-methyl-1H-indol-3-yl)ethyl)thio)propyl)diphenylsilanol (5s)**

**Yield:** 48% . (EA : PE = 1 : 10). Pale yellow oil. **IR** (neat,  $\nu$ ,  $\text{cm}^{-1}$ ): 3002, 1710, 1359, 1220, 742, 704.  $^1\text{H NMR}$  (400 MHz,  $\text{CDCl}_3$ )  $\delta$  7.51 – 7.46 (m, 4H), 7.45 – 7.41 (m, 1H), 7.28 – 7.21 (m, 6H), 7.16 (d,  $J = 8.1$  Hz, 1H), 7.10 (m,  $J = 8.1, 1.1$  Hz, 1H), 6.99 (m,  $J = 8.0, 6.8, 1.2$  Hz, 1H), 6.71 (s, 1H), 3.57 (s, 3H), 2.91 – 2.84 (m, 2H), 2.76 (d,  $J = 13.3$  Hz, 1H), 2.66 (dd,  $J = 8.8, 6.8$  Hz, 2H), 2.48 (t,  $J = 7.1$  Hz, 2H), 1.70 – 1.60 (m, 2H), 1.21 – 1.16 (m, 2H).  $^{13}\text{C NMR}$  (100 MHz,  $\text{CDCl}_3$ )  $\delta$  137.1, 136.3, 134.3, 130.0, 128.0, 127.7, 126.6, 121.6, 118.8(9), 118.8(5), 113.6, 109.3, 35.6, 32.8, 32.7, 26.0, 23.4, 14.7. **HRMS** (CI)  $m/z$  calcd for  $\text{C}_{26}\text{H}_{29}\text{NOSSi}$  ( $\text{M}^+$ ): 431.1739; found 431.1736.

## VI. References

- (1) (a) Barday, M.; Janot, C.; Halcovitch, N. R.; Muir, J.; Aïssa, C. *Angew. Chem. Int. Ed.*, **2017**, *56*, 13117. (b) Lu, L. Q.; Cao, Y. J.; Liu, X. P.; An, J.; Yao, C. J.; Ming, Z. H.; Xiao, W. J. *J. Am. Chem. Soc.* **2008**, *130*, 6946. (c) Ratts, K. W.; Yao, A. N. *J. Org. Chem.* **1966**, *31*, 1185.
- (2) Bogonda, G.; Patil, D. V.; Kim, H. Y.; Oh, K. *Org. Lett.* **2019**, *21*, 3774.
- (3) Fang, Y.; Rogge, T.; Ackermann, L.; Wang, S. -Y.; Ji, S.-J. *Nat Commun.* **2018**, *9*, 2240.
- (4) Cai, L.-B.; Zhu, X.-Y.; Chen, J.-Y.; Lin, A.-J.; Yao, H.-Q. *Org. Chem. Front.* **2019**, *6*, 3688.
- (5) (a) Jiang, M.; Li, H.-F.; Yang, H.-J.; Fu, H. *Angew. Chem.* **2017**, *129*, 892–897.

## VII. Copies of $^1\text{H}$ NMR $^{13}\text{C}$ NMR and $^{29}\text{Si}$ NMR Spectra

$^{29}\text{Si}$  NMR Spectra of Nuclear magnetic tube (79 MHz,  $\text{CDCl}_3$ )

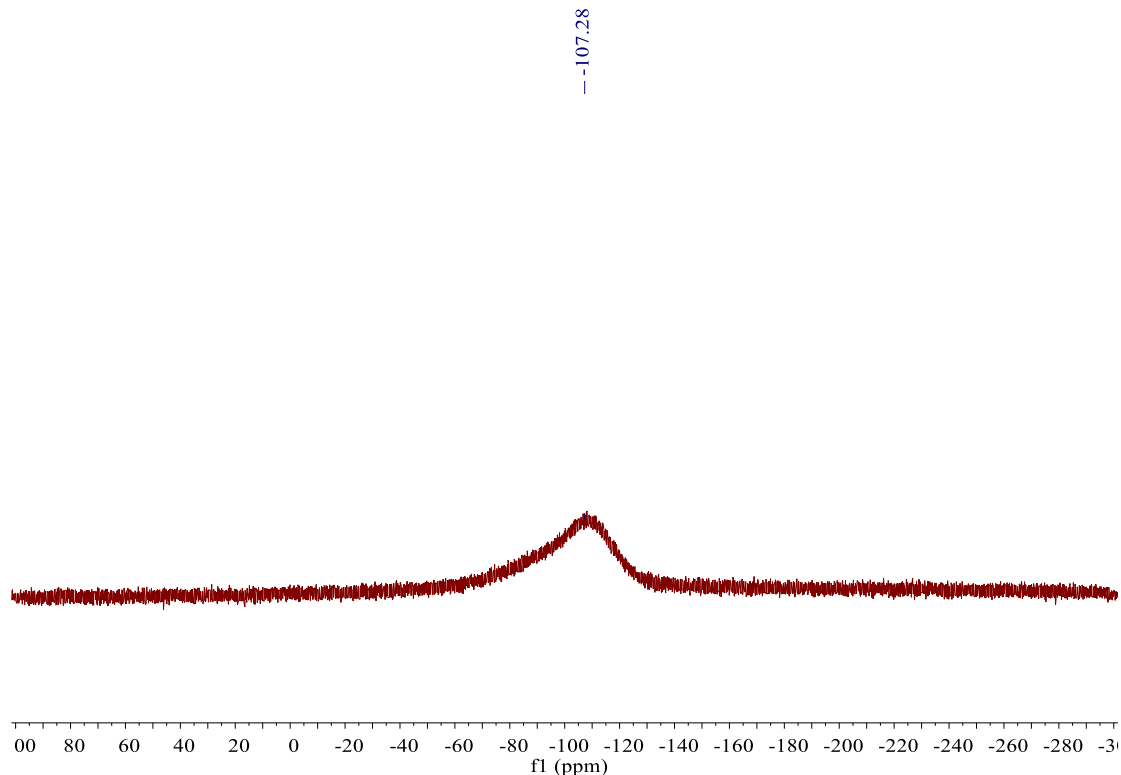

$^1\text{H}$  NMR Spectra of **3a** (400 MHz,  $\text{CDCl}_3$ )

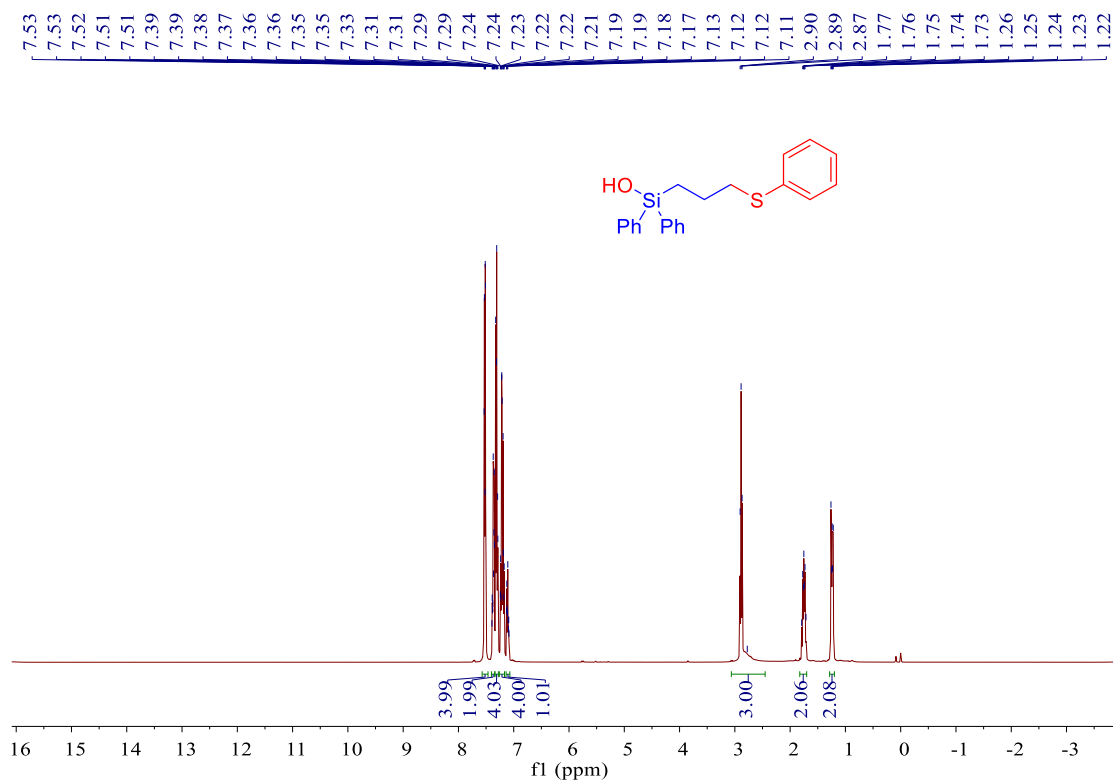

<sup>13</sup>C NMR Spectra of **3a** (100 MHz, CDCl<sub>3</sub>)

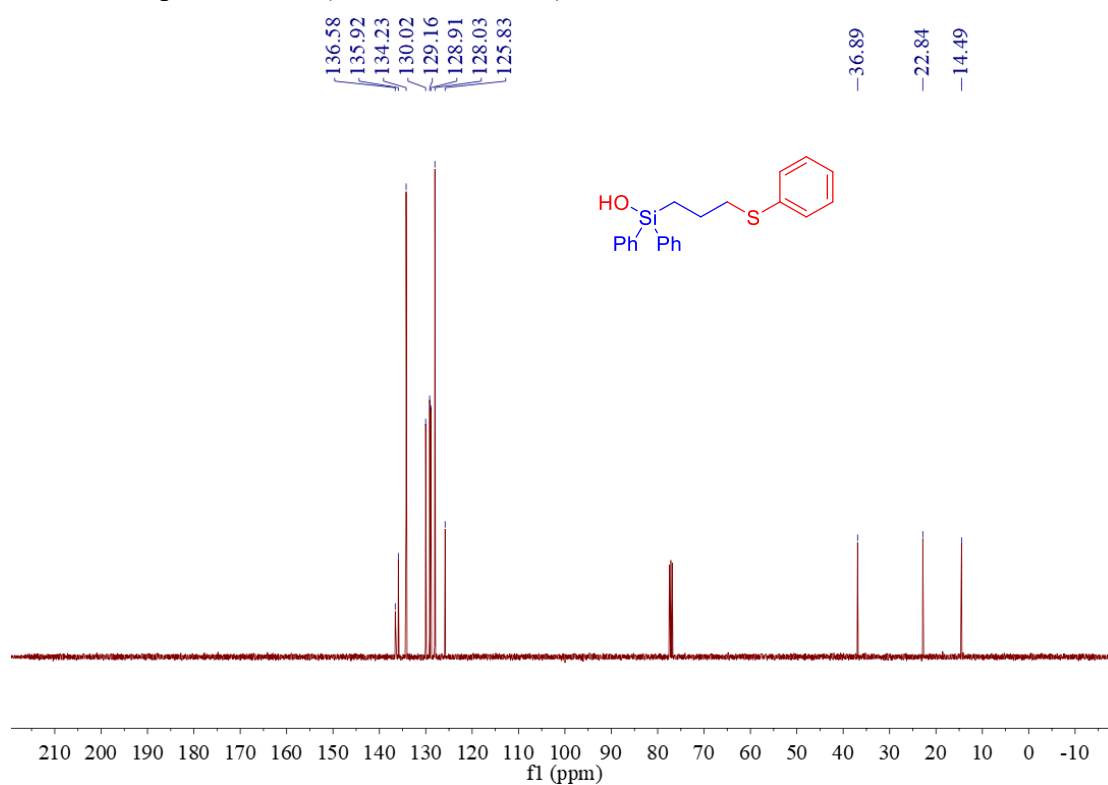

<sup>1</sup>H NMR Spectra of **3b** (400 MHz, CDCl<sub>3</sub>)

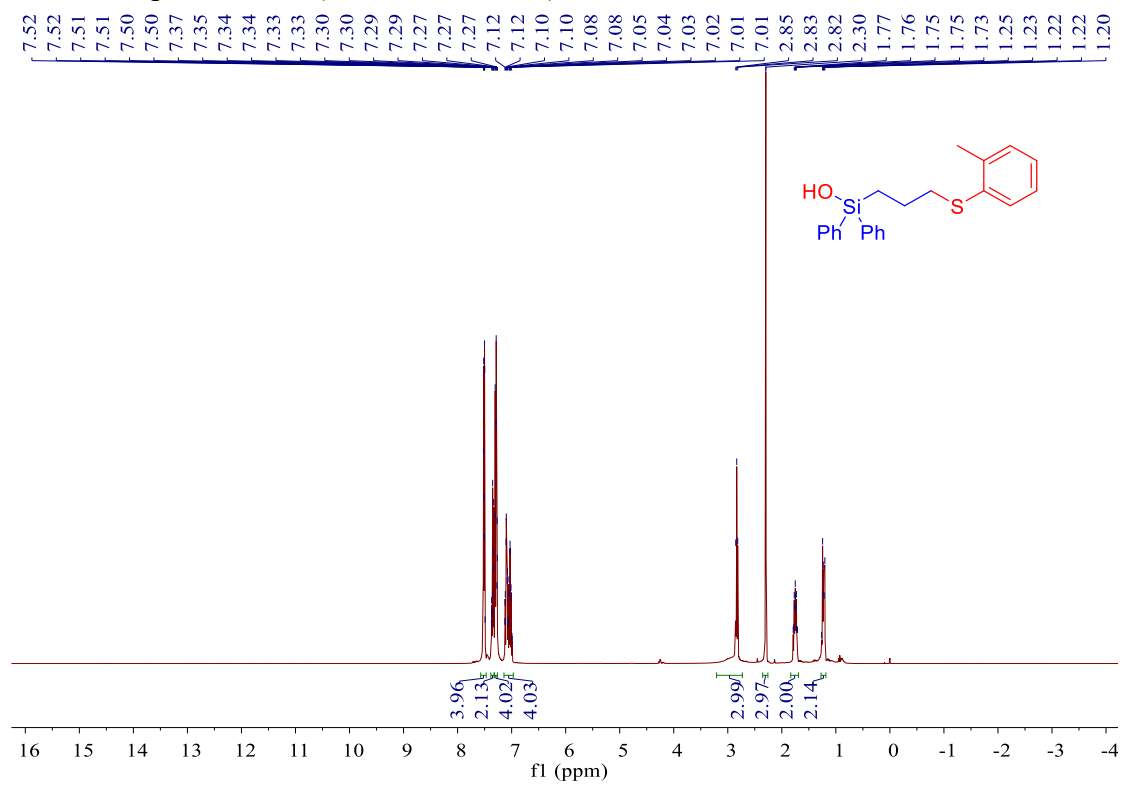

<sup>13</sup>C NMR Spectra of **3b** (100 MHz, CDCl<sub>3</sub>)

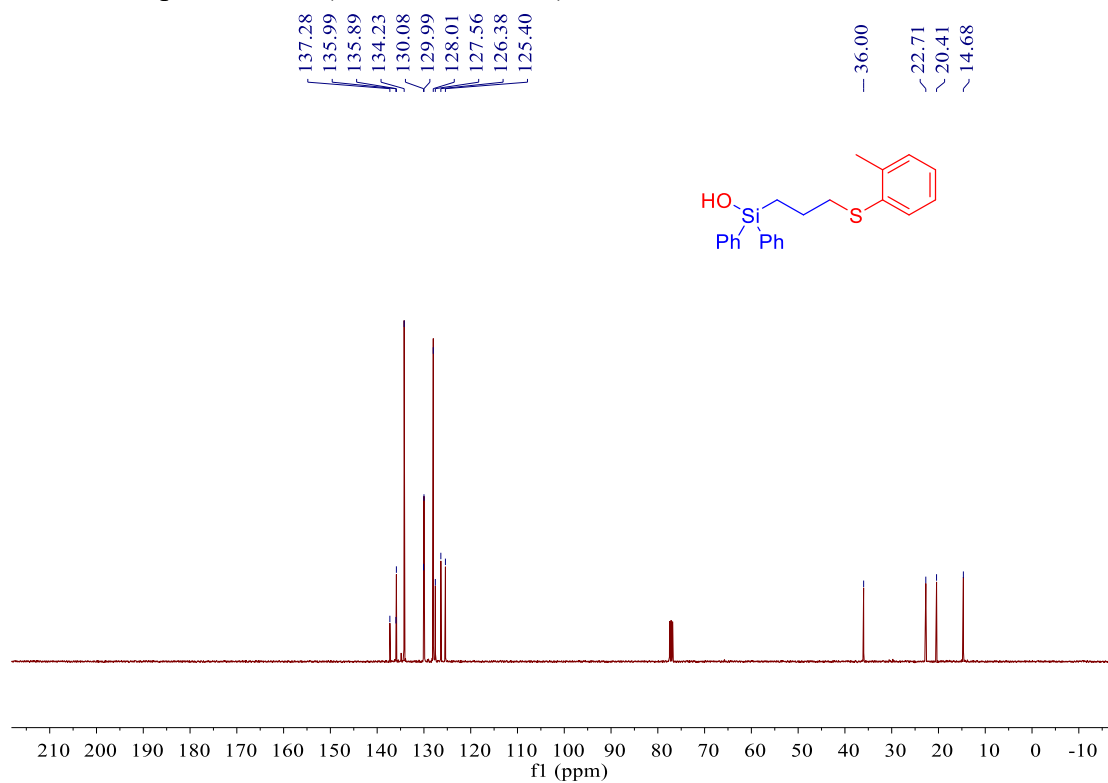

<sup>1</sup>H NMR Spectra of **3c** (400 MHz, CDCl<sub>3</sub>)

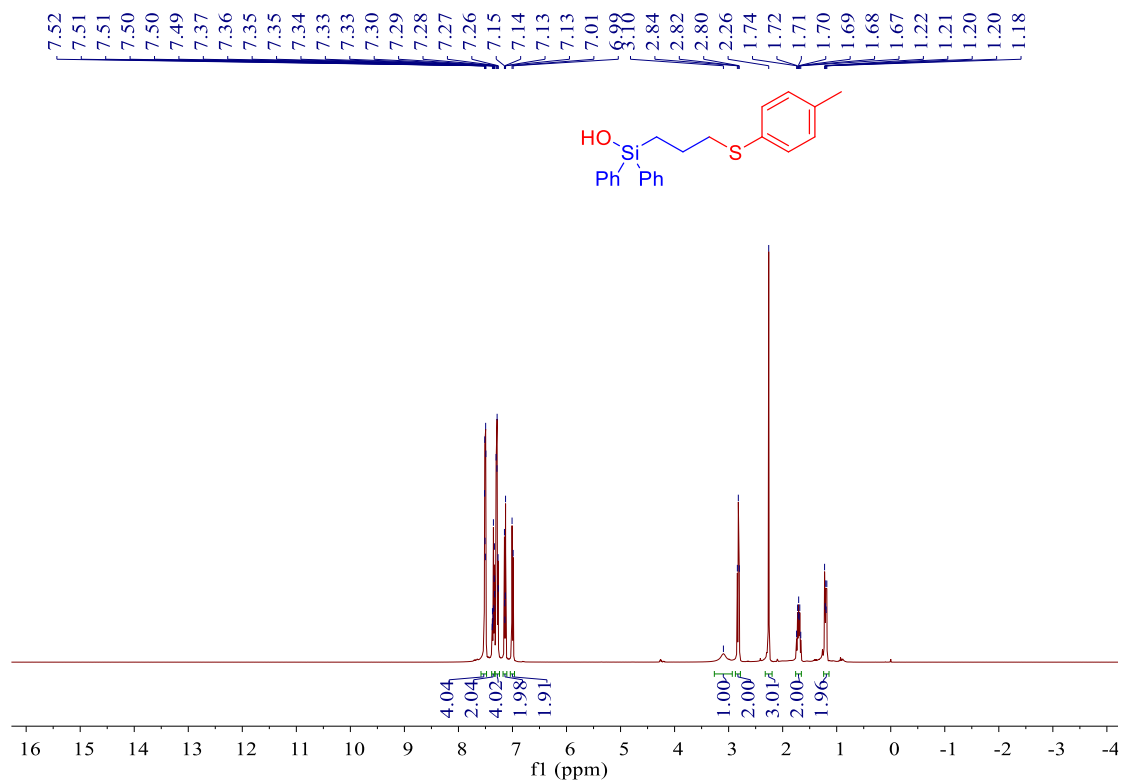

<sup>13</sup>C NMR Spectra of **3c** (100 MHz, CDCl<sub>3</sub>)

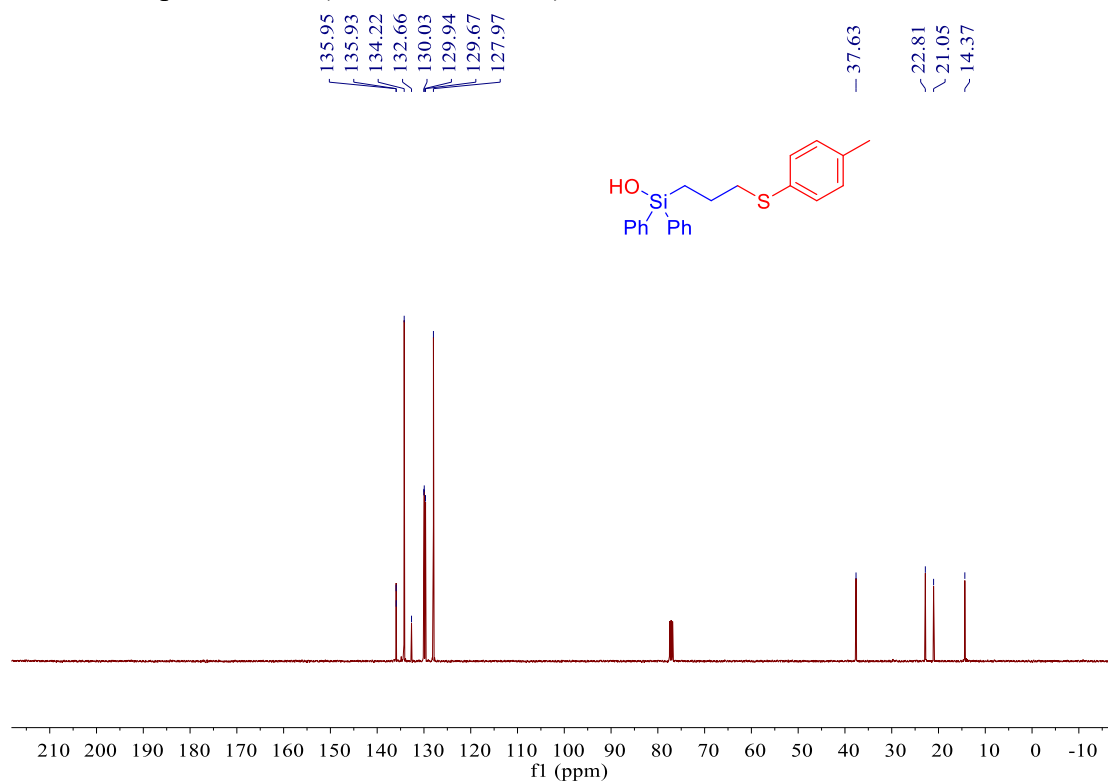

<sup>29</sup>Si NMR Spectra of **3c** (79 MHz, CDCl<sub>3</sub>)

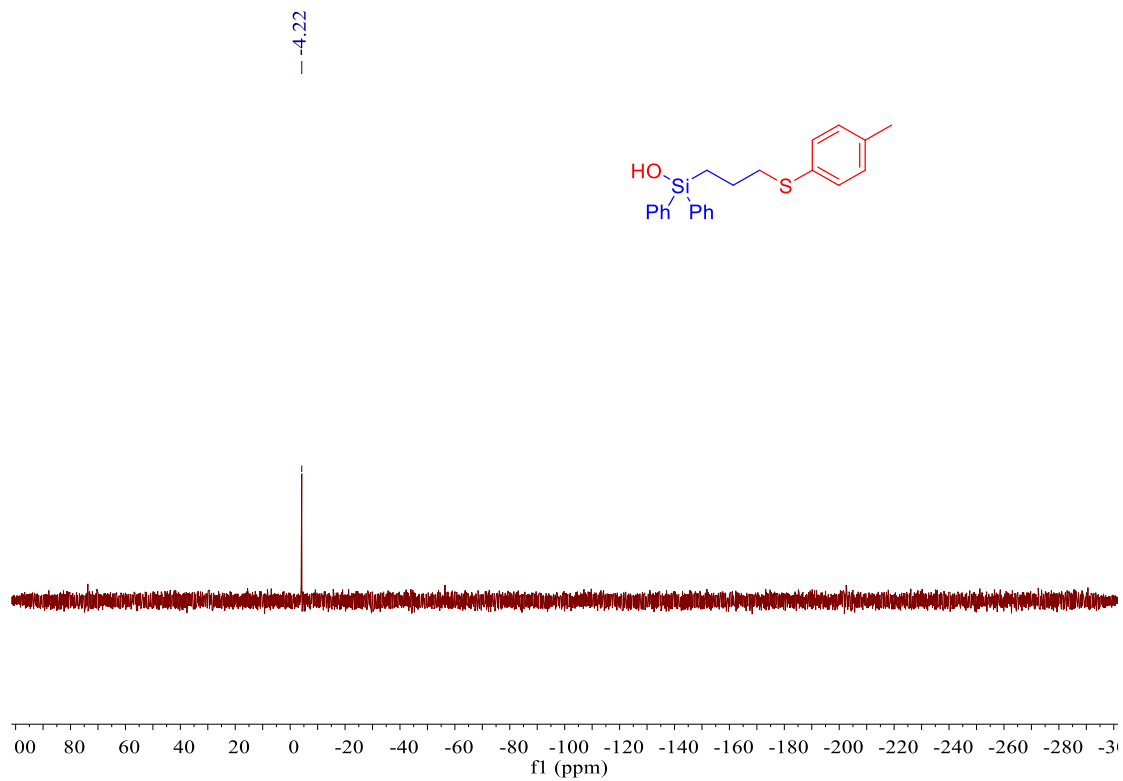

### $^1\text{H}$ NMR Spectra of **3d** (400 MHz, $\text{CDCl}_3$ )

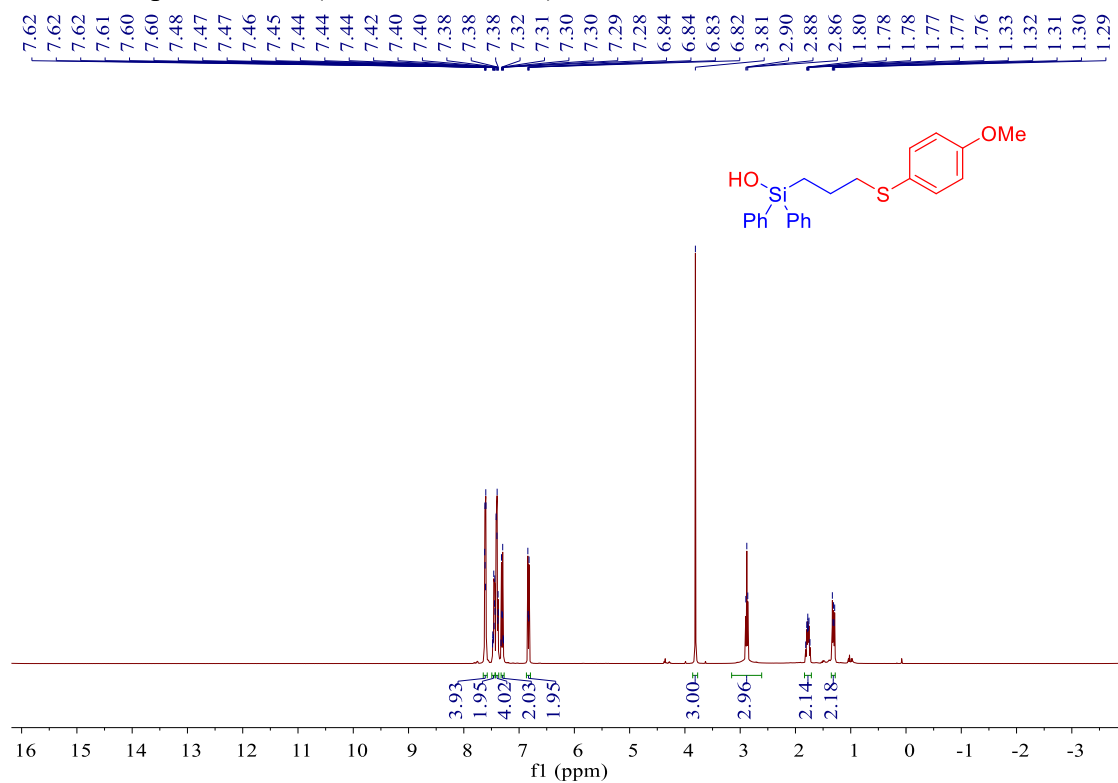

### $^{13}\text{C}$ NMR Spectra of **3d** (100 MHz, $\text{CDCl}_3$ )

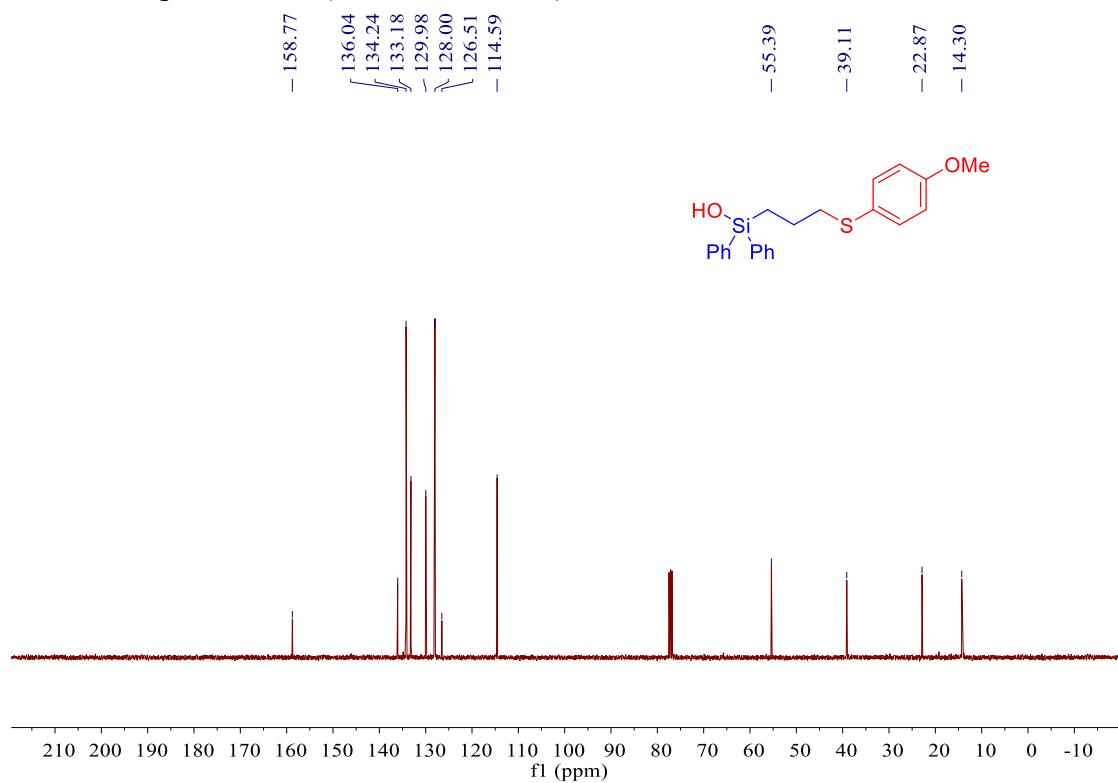



### <sup>1</sup>H NMR Spectra of **3e** (400 MHz, CDCl<sub>3</sub>)

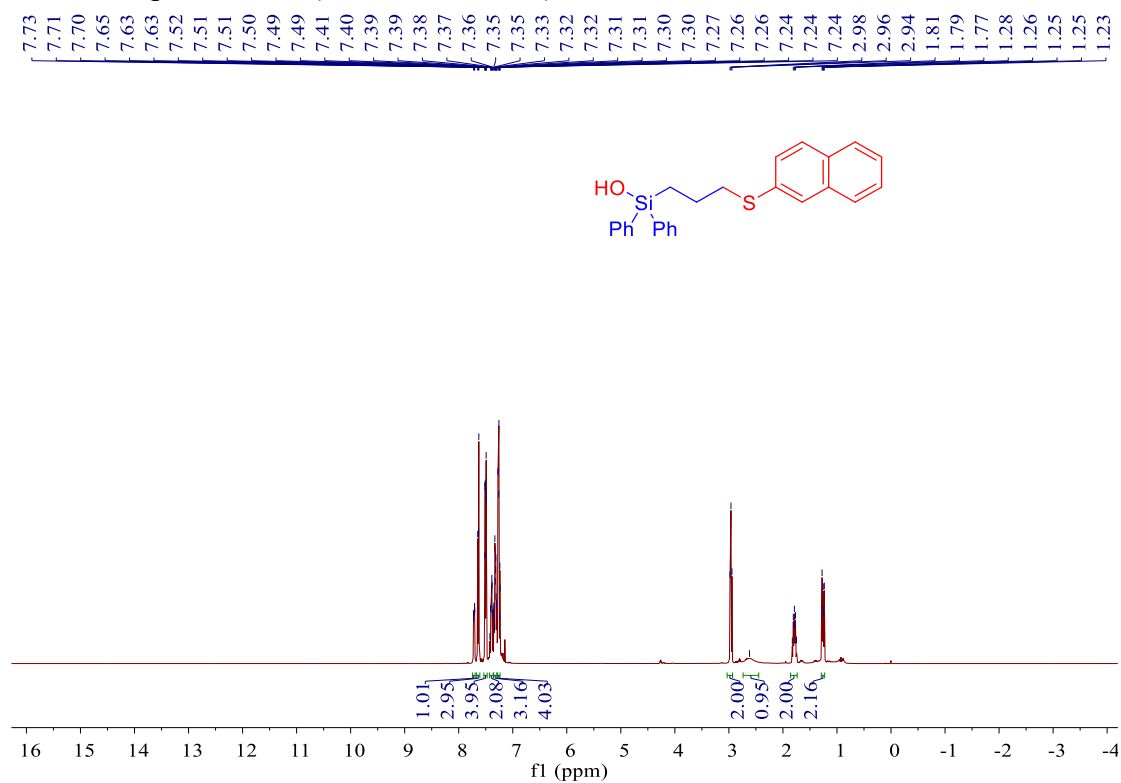

### <sup>13</sup>C NMR Spectra of **3e** (100 MHz, CDCl<sub>3</sub>)

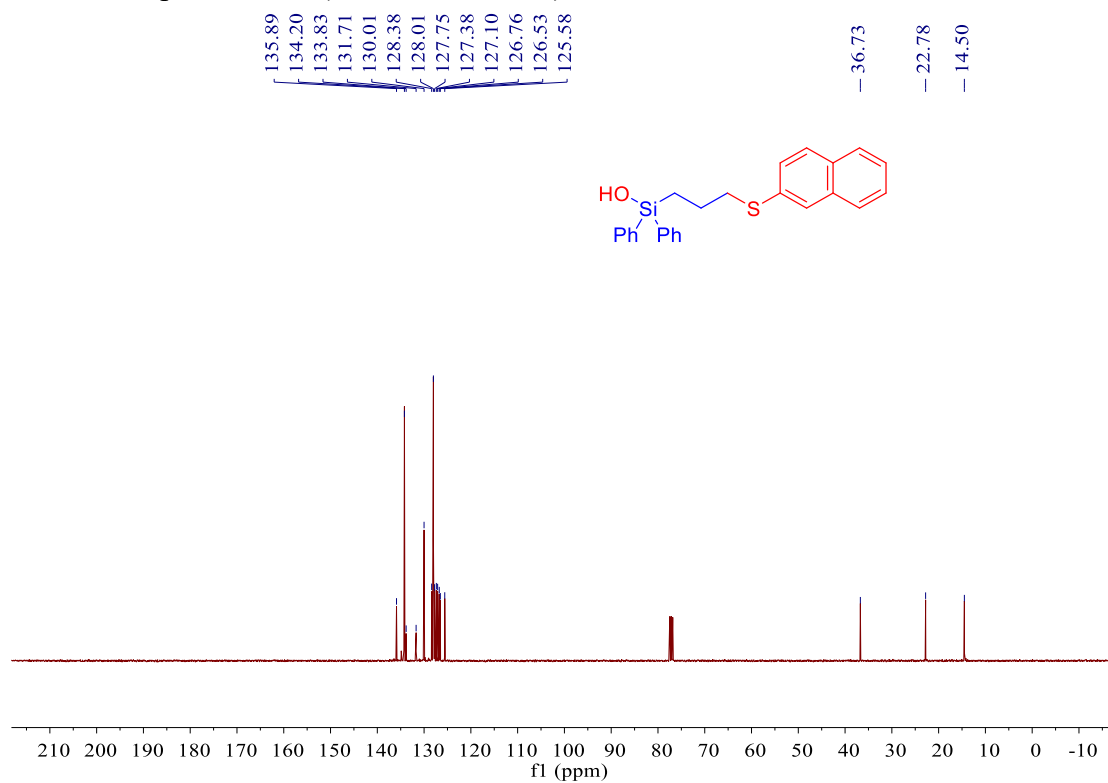

### $^1\text{H}$ NMR Spectra of **3f** (400 MHz, $\text{CDCl}_3$ )

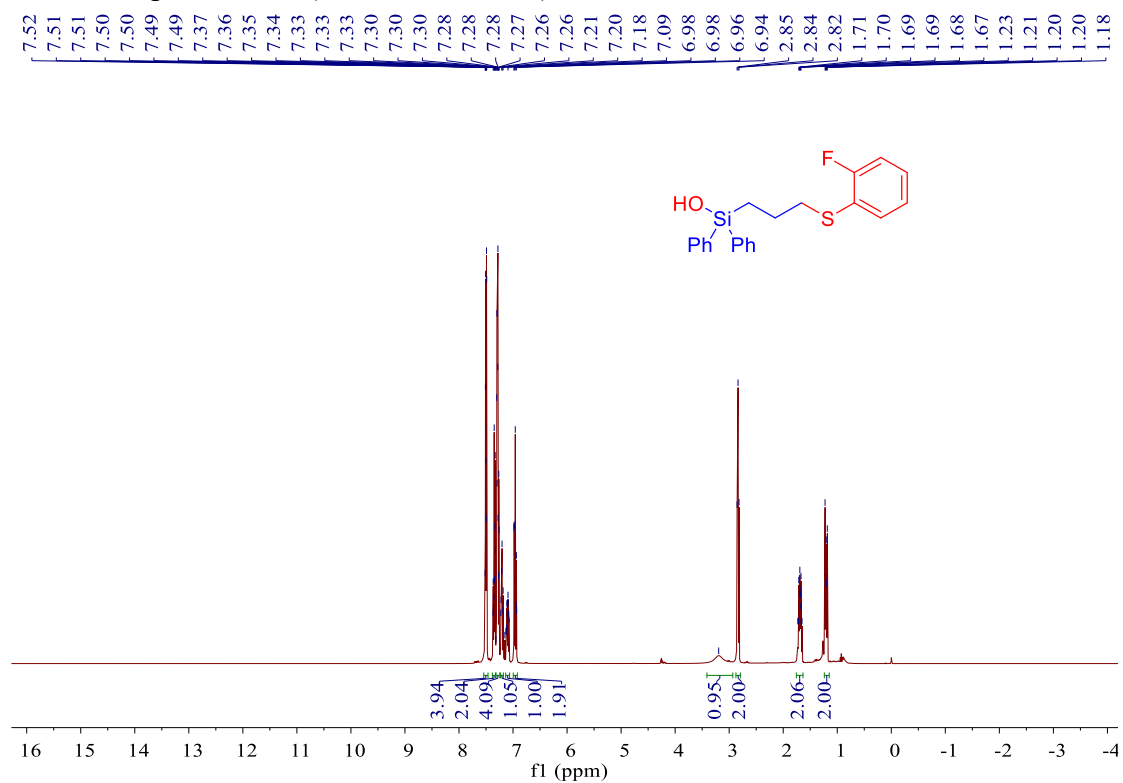

### $^{13}\text{C}$ NMR Spectra of **3f** (100 MHz, $\text{CDCl}_3$ )

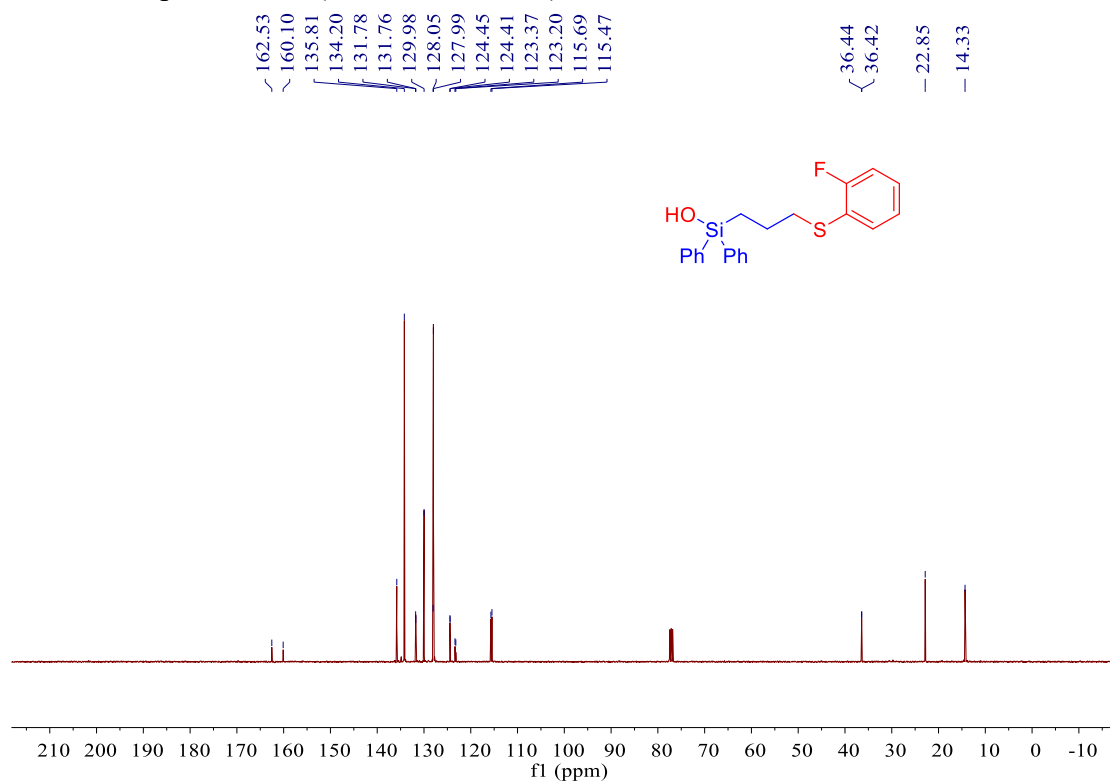

### <sup>1</sup>H NMR Spectra of **3g** (400 MHz, CDCl<sub>3</sub>)

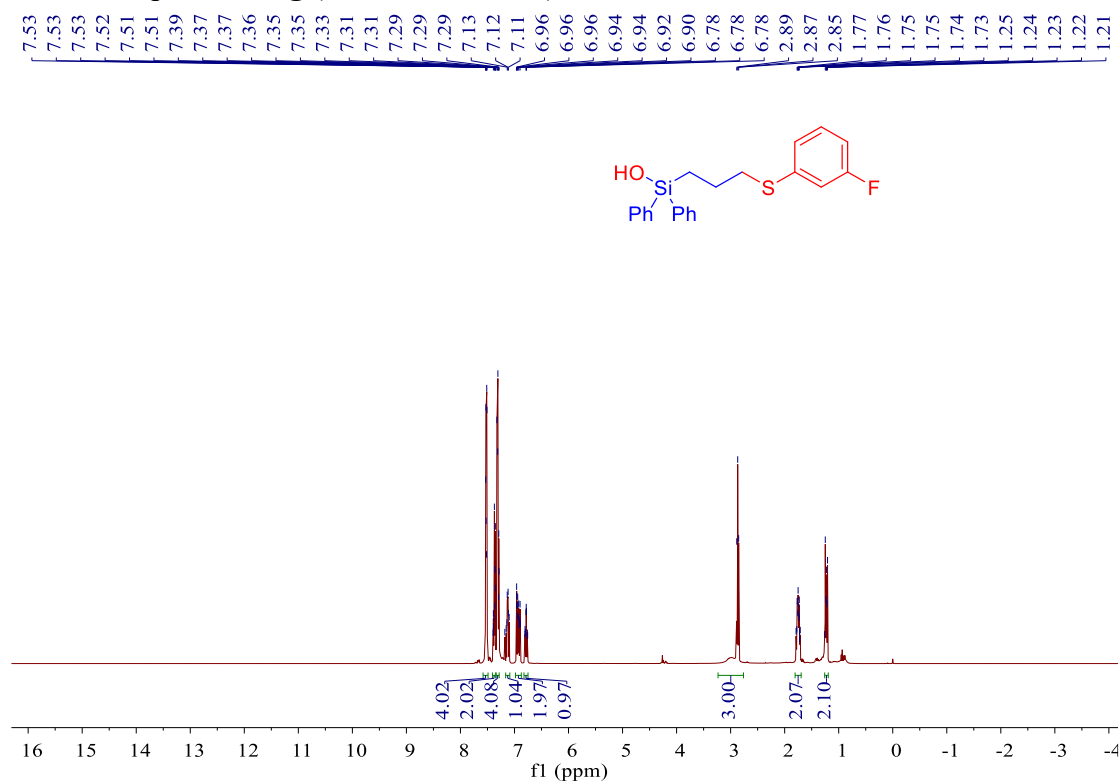

### <sup>13</sup>C NMR Spectra of **3g** (100 MHz, CDCl<sub>3</sub>)

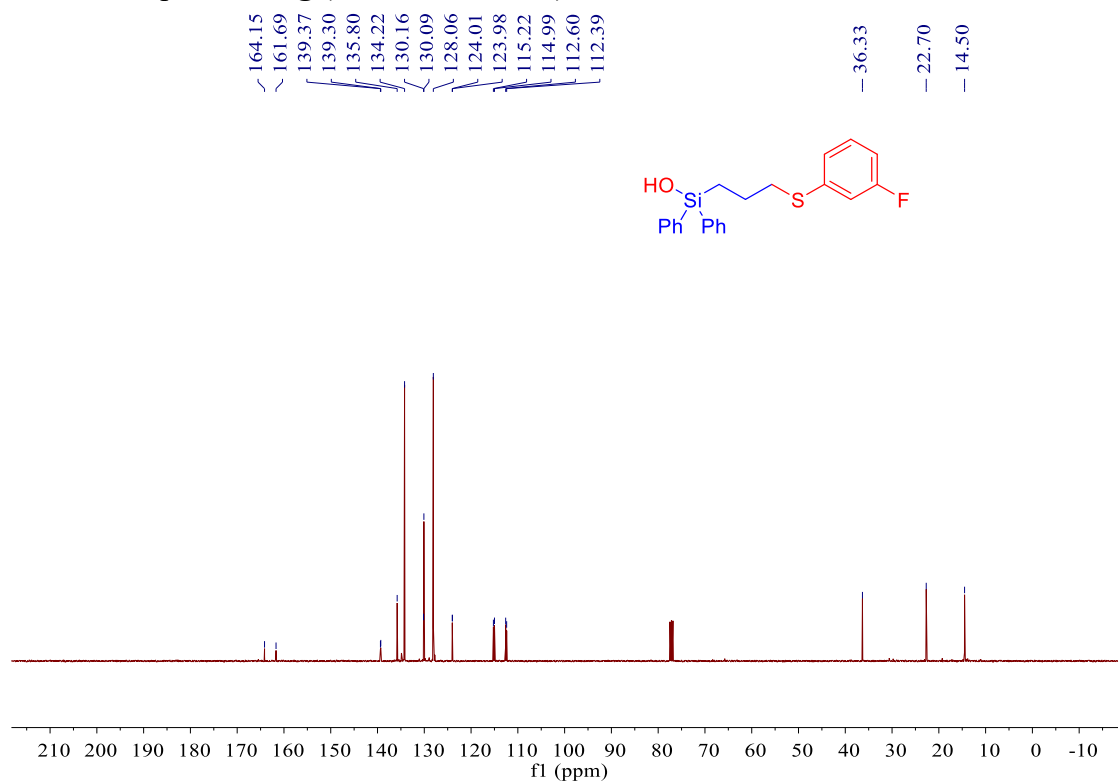

### <sup>1</sup>H NMR Spectra of **3h** (400 MHz, CDCl<sub>3</sub>)

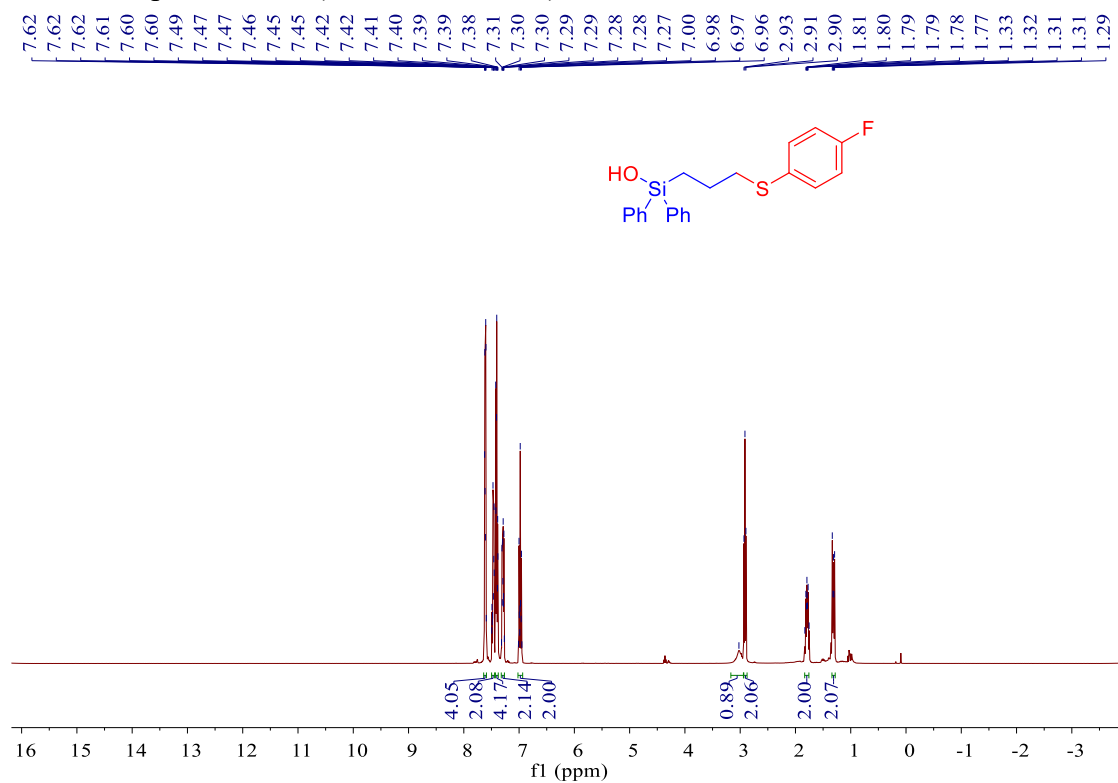

### <sup>13</sup>C NMR Spectra of **3h** (100 MHz, CDCl<sub>3</sub>)

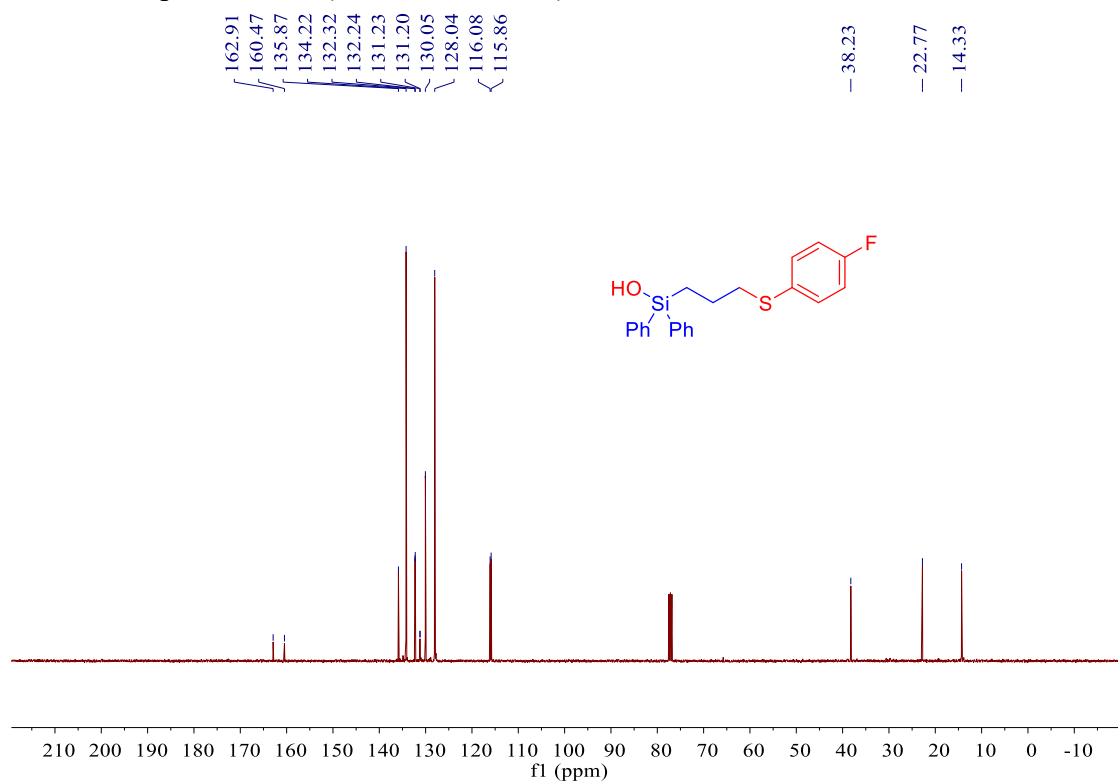

### <sup>1</sup>H NMR Spectra of **3i** (400 MHz, CDCl<sub>3</sub>)

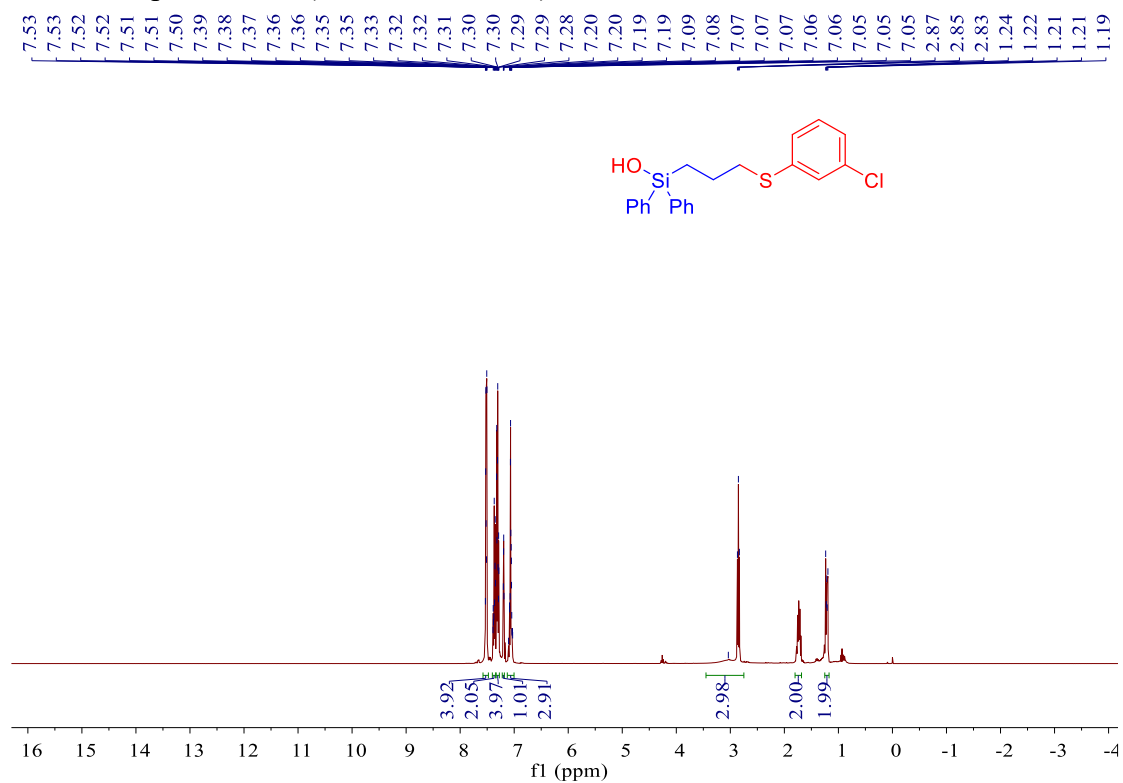

### <sup>13</sup>C NMR Spectra of **3i** (100 MHz, CDCl<sub>3</sub>)

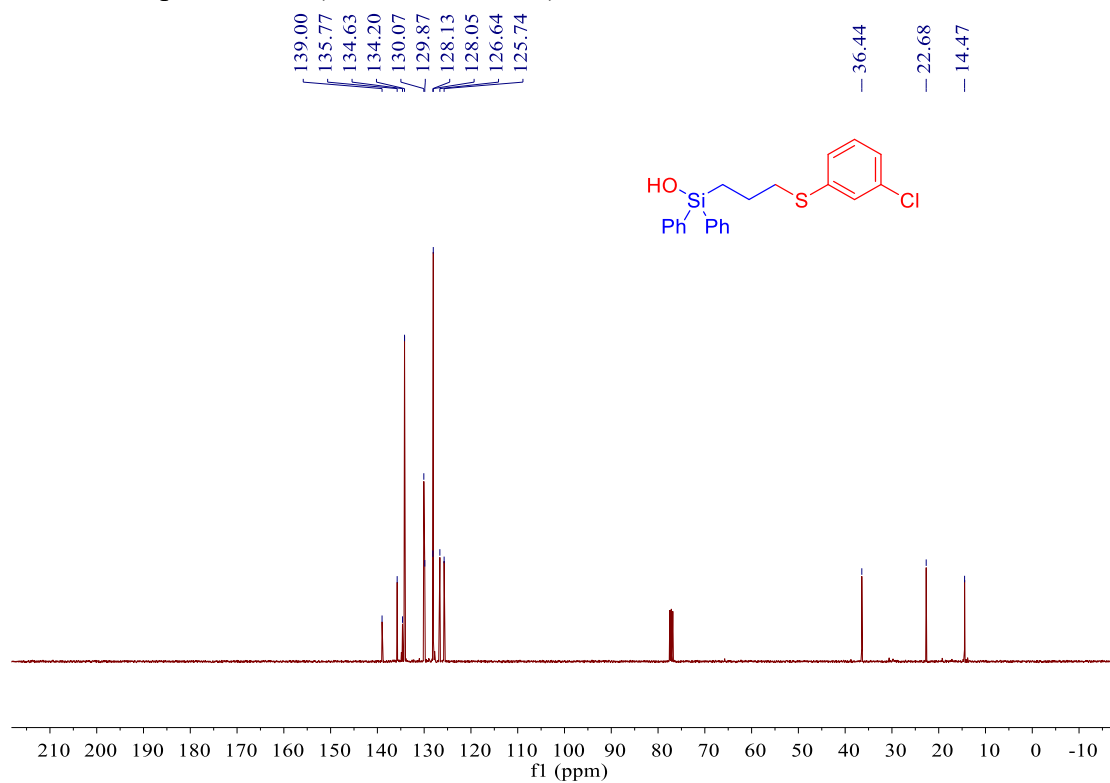

### $^1\text{H}$ NMR Spectra of **3j** (400 MHz, $\text{CDCl}_3$ )

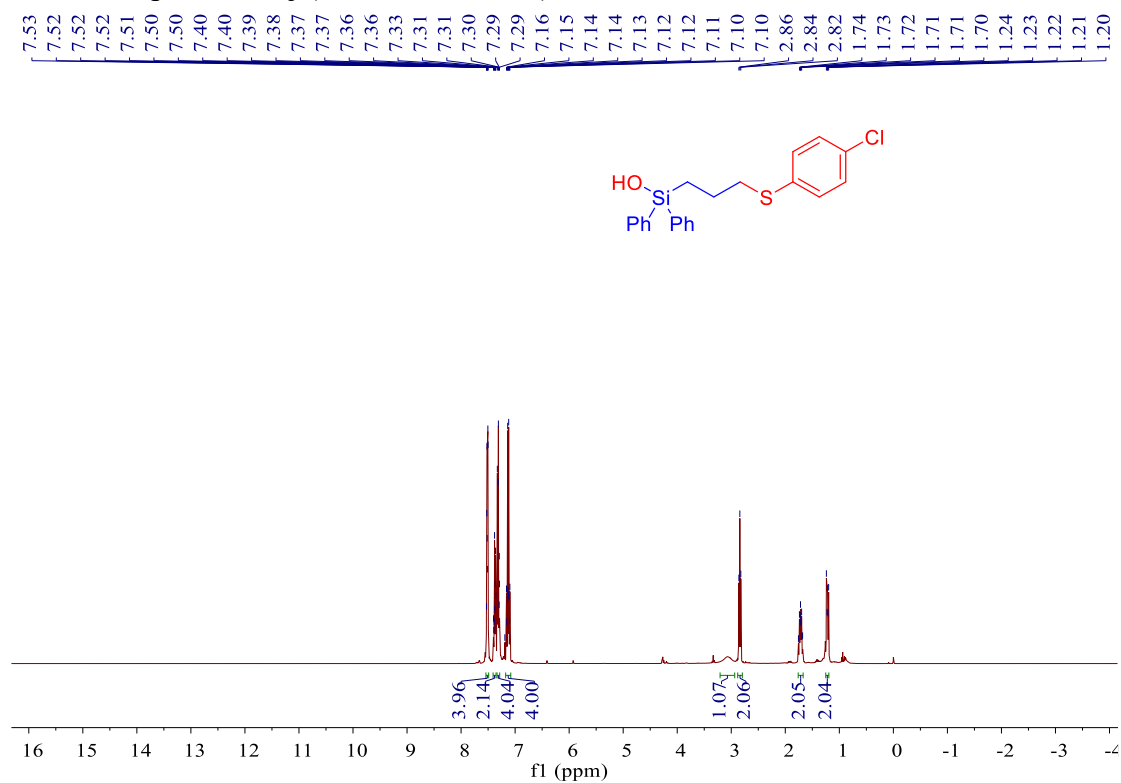

### $^{13}\text{C}$ NMR Spectra of **3j** (100 MHz, $\text{CDCl}_3$ )

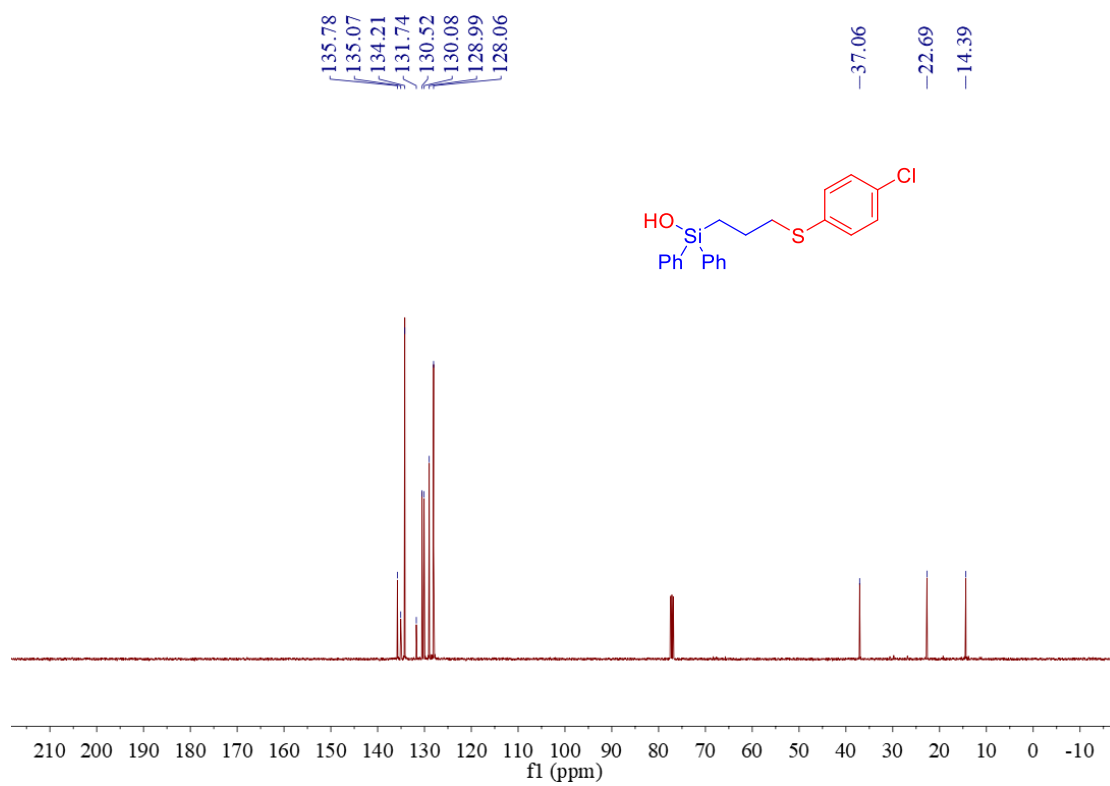

### <sup>1</sup>H NMR Spectra of **3k** (400 MHz, CDCl<sub>3</sub>)

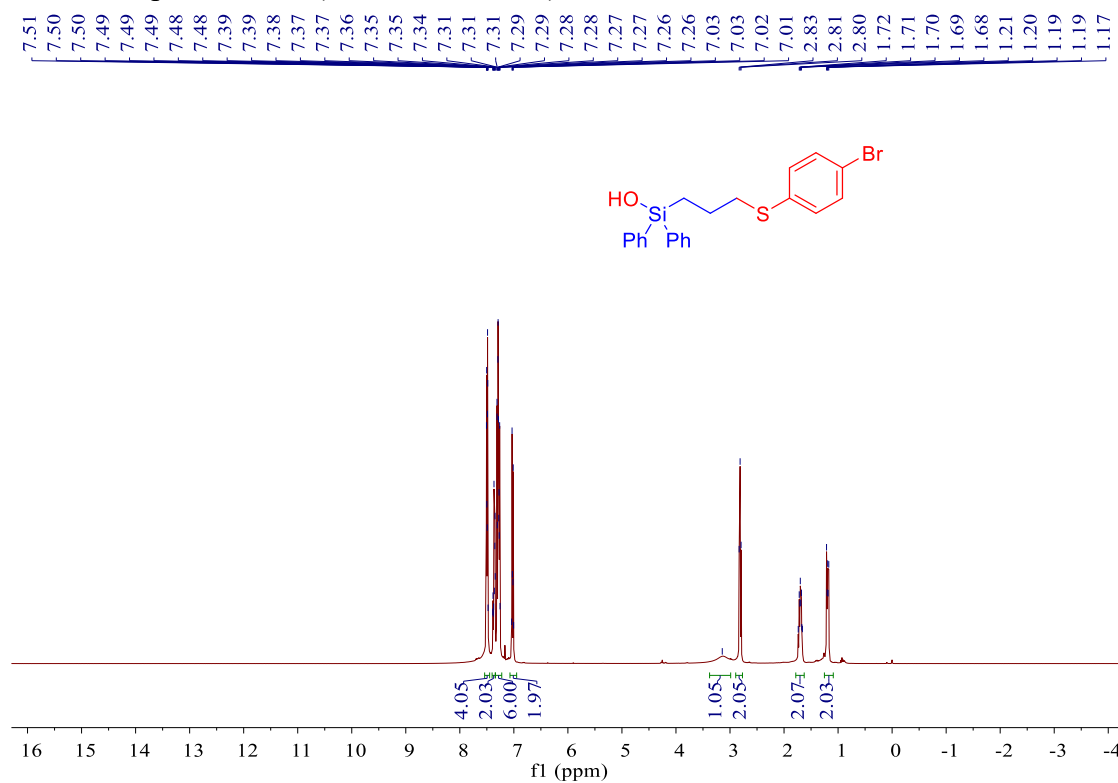

### <sup>13</sup>C NMR Spectra of **3k** (100 MHz, CDCl<sub>3</sub>)

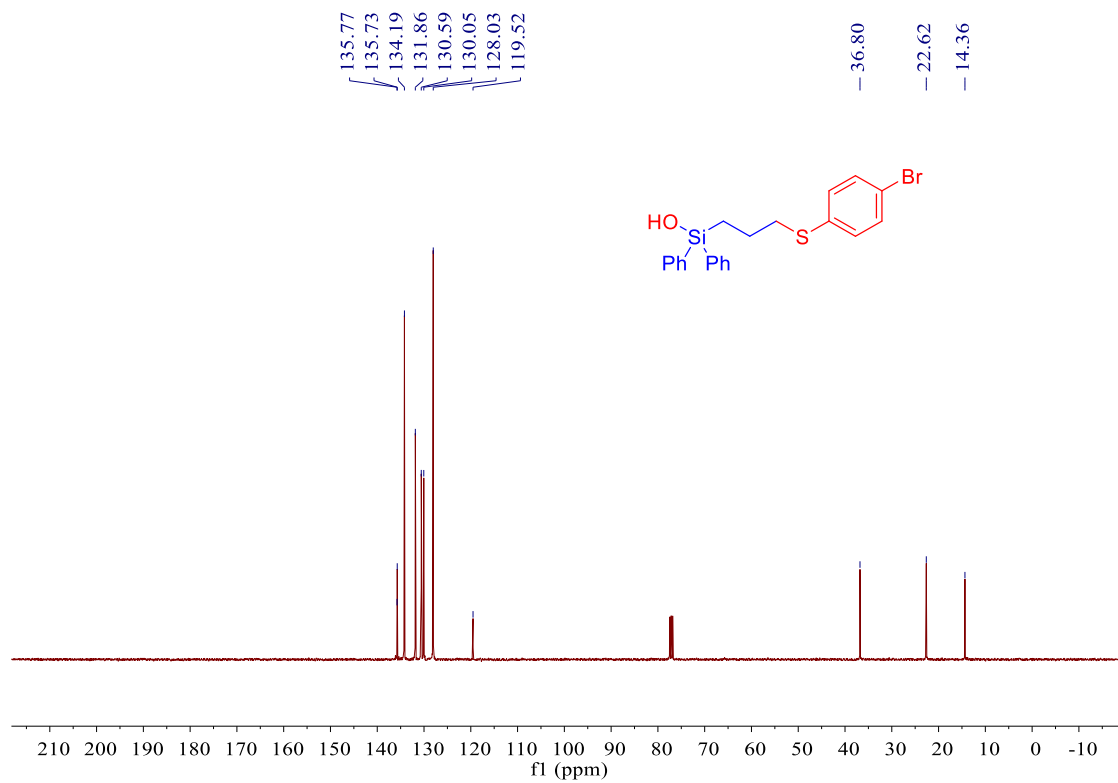

### <sup>1</sup>H NMR Spectra of **31** (400 MHz, CDCl<sub>3</sub>)

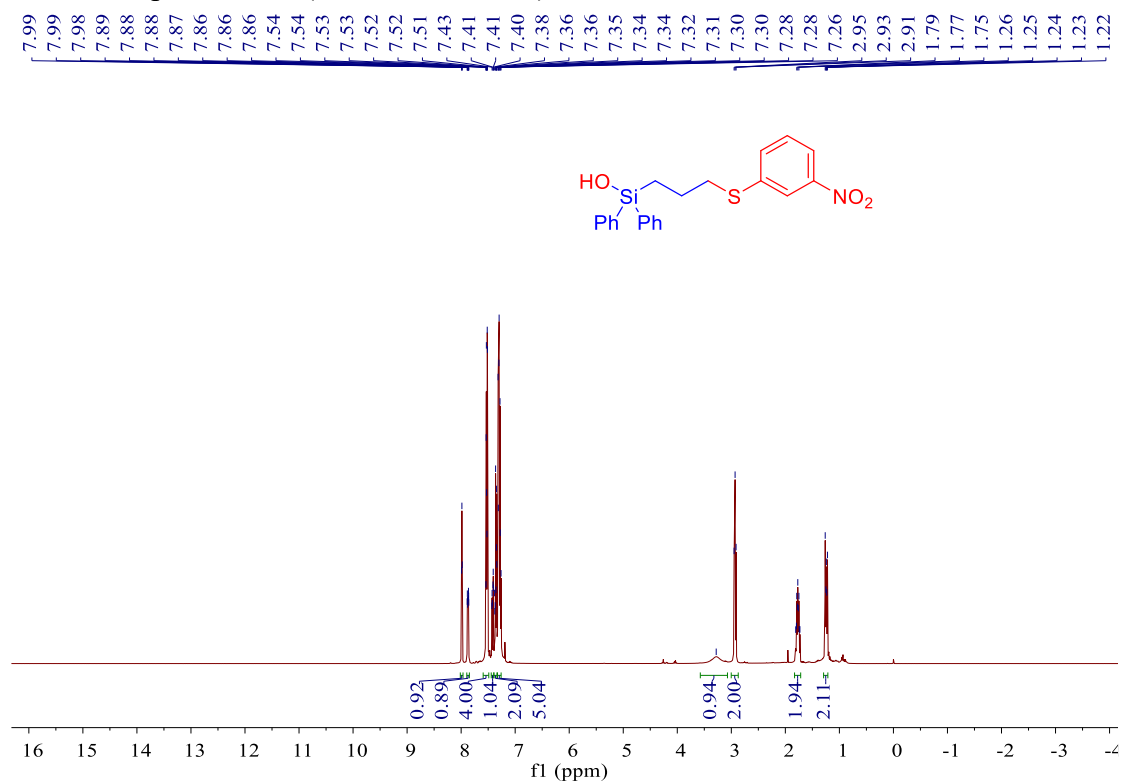

### <sup>13</sup>C NMR Spectra of **31** (100 MHz, CDCl<sub>3</sub>)

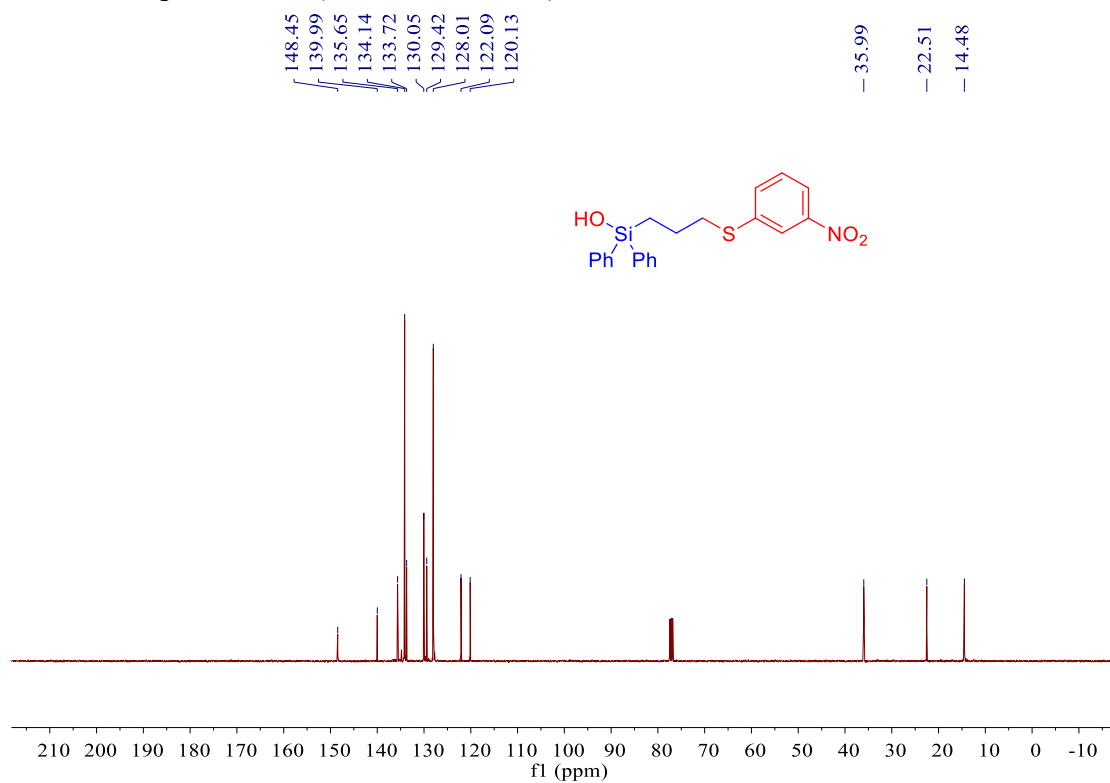



### $^1\text{H}$ NMR Spectra of **3m** (400 MHz, $\text{CDCl}_3$ )

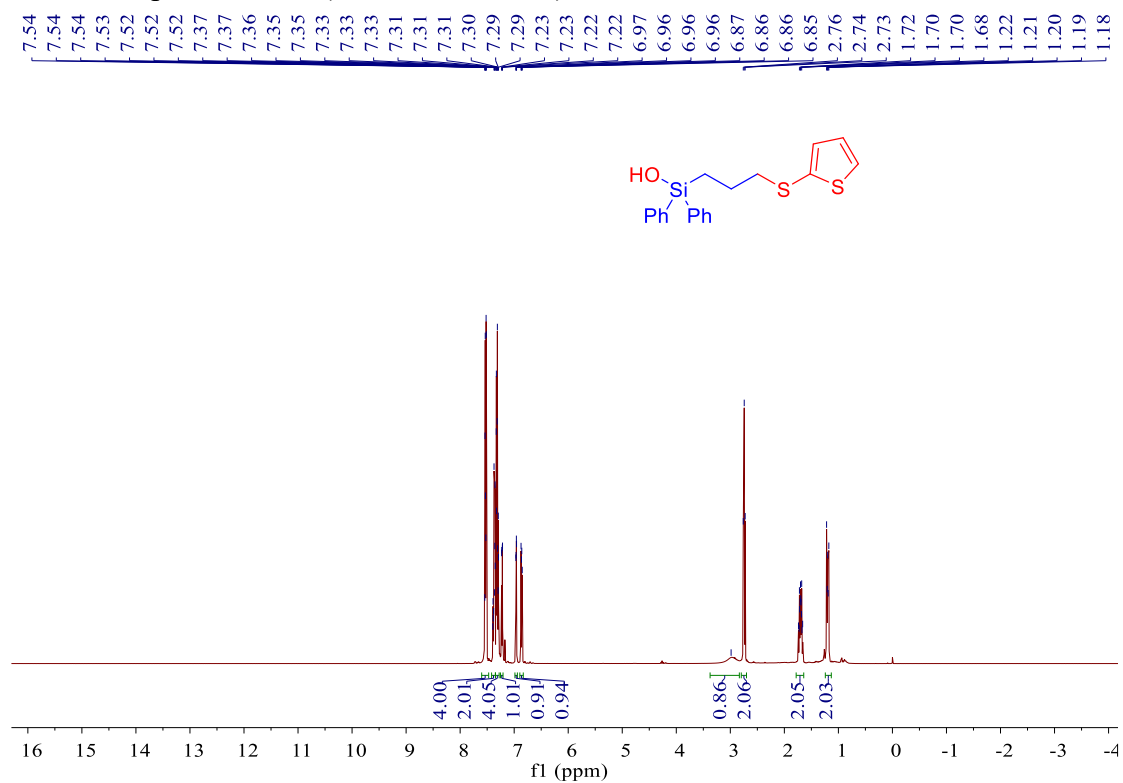

### $^{13}\text{C}$ NMR Spectra of **3m** (100 MHz, $\text{CDCl}_3$ )

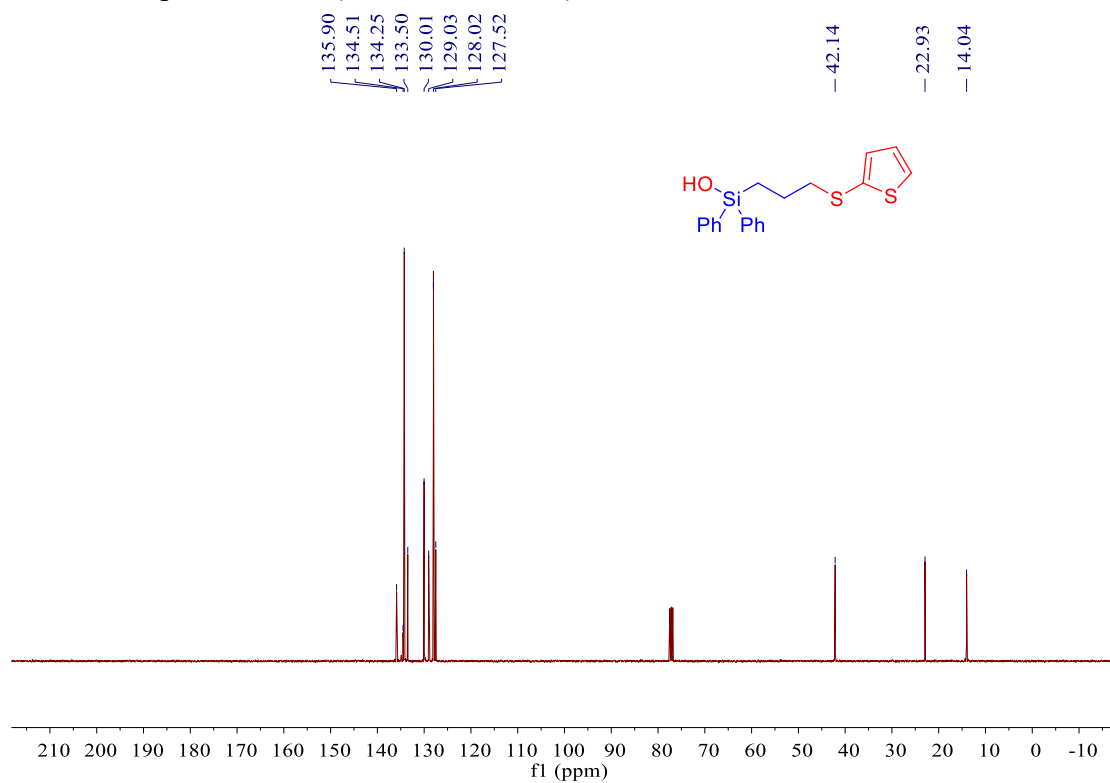

### $^1\text{H}$ NMR Spectra of **3n** (400 MHz, $\text{CDCl}_3$ )

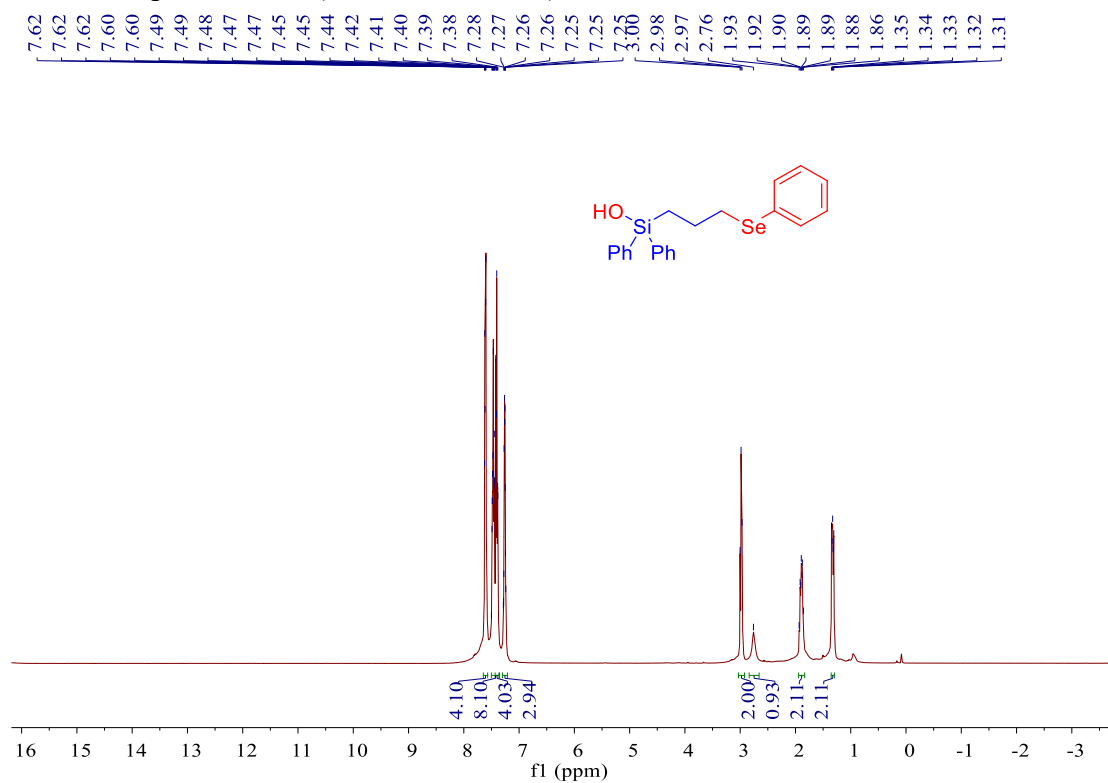

### $^{13}\text{C}$ NMR Spectra of **3n** (100 MHz, $\text{CDCl}_3$ )

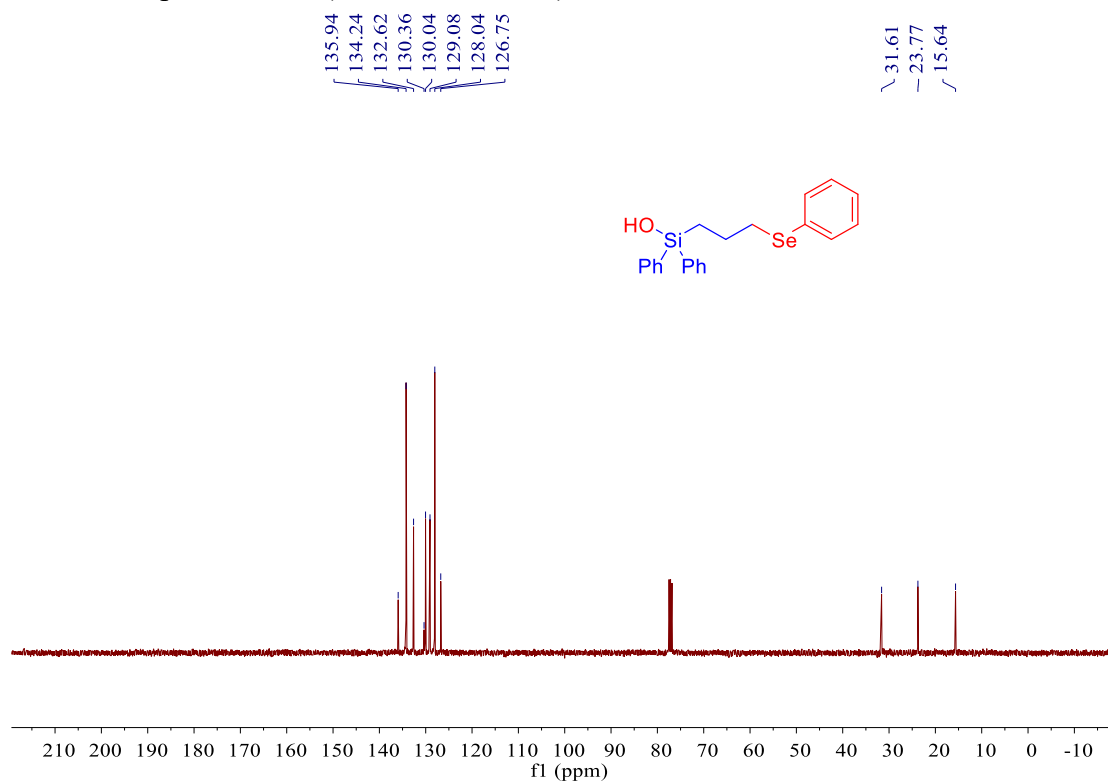

### <sup>1</sup>H NMR Spectra of **3o** (400 MHz, CDCl<sub>3</sub>)

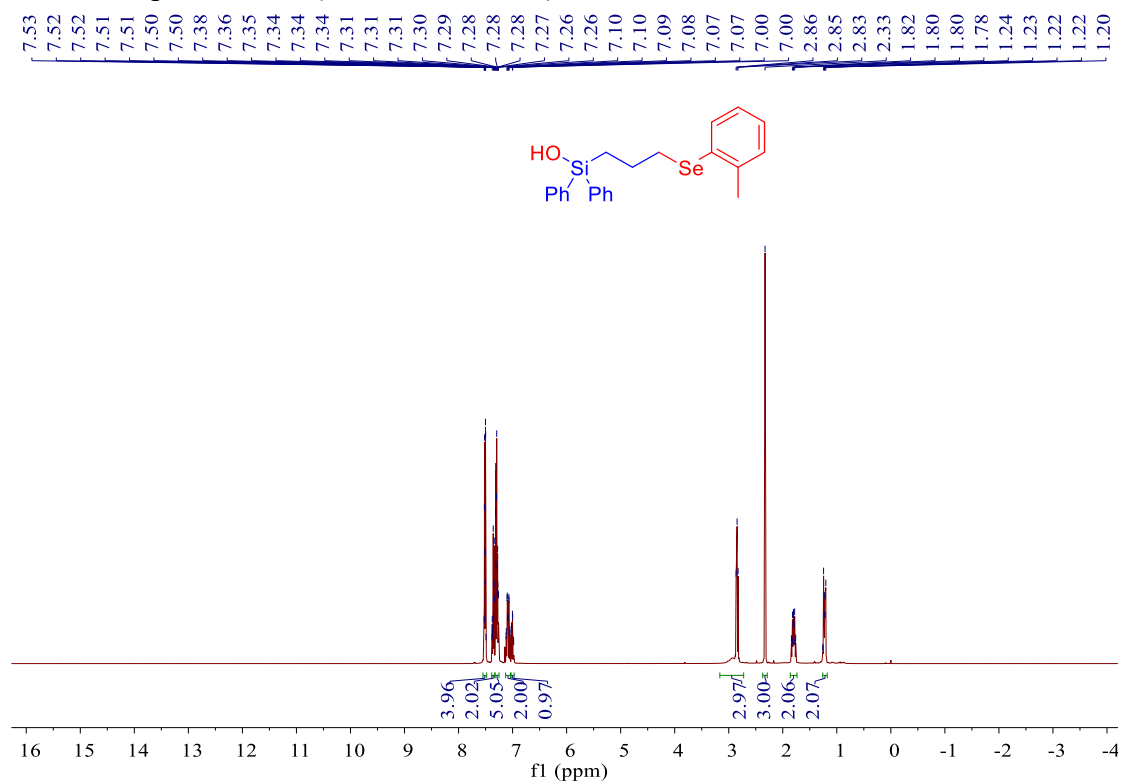

### <sup>13</sup>C NMR Spectra of **3o** (100 MHz, CDCl<sub>3</sub>)

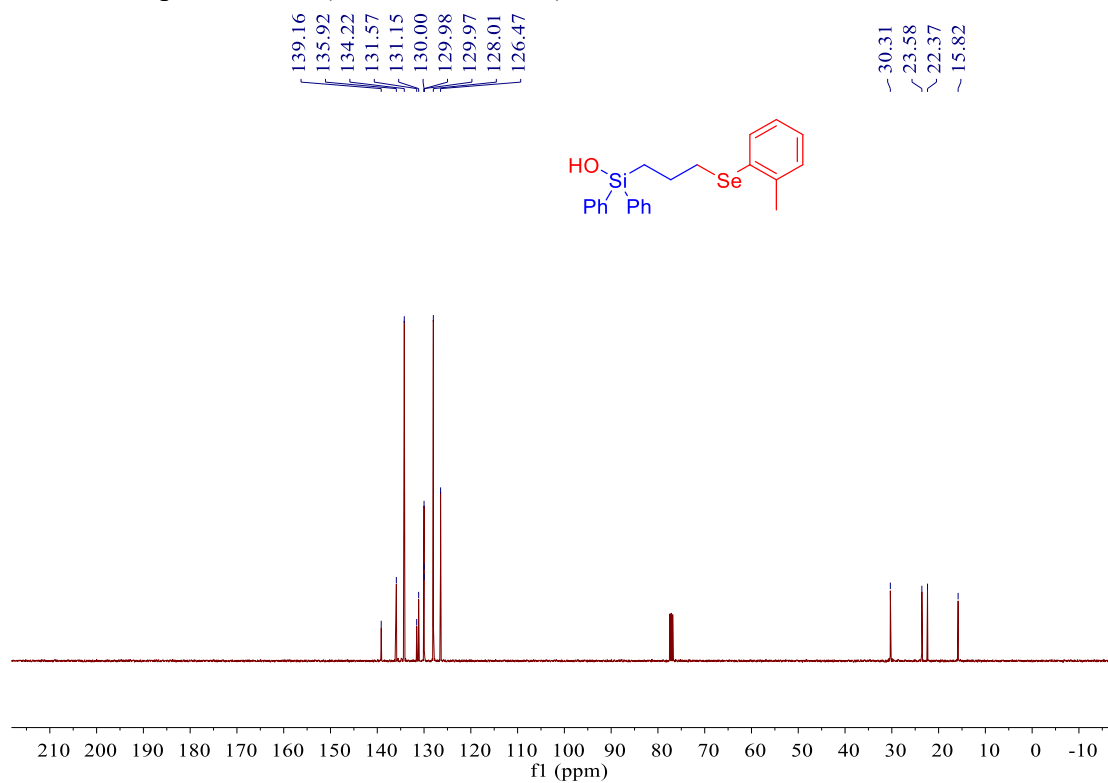

<sup>77</sup>Se NMR Spectra of **3o** (400 MHz, CDCl<sub>3</sub>)

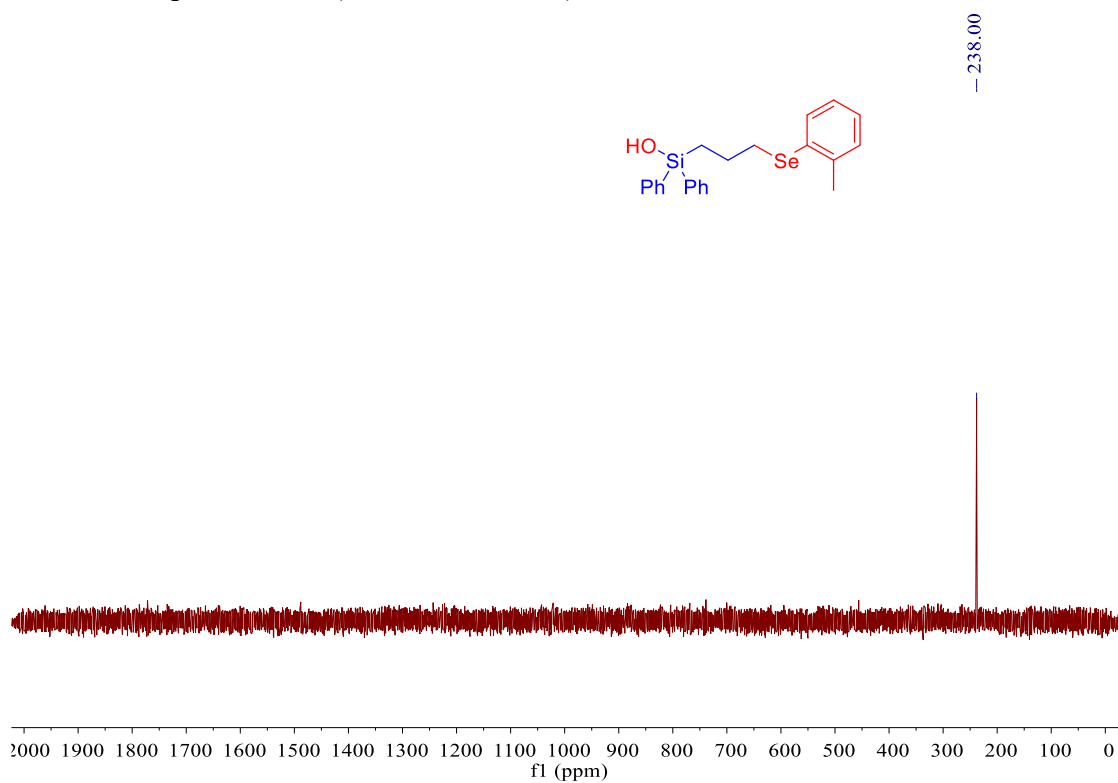

<sup>29</sup>Si NMR Spectra of **3o** (79 MHz, CDCl<sub>3</sub>)

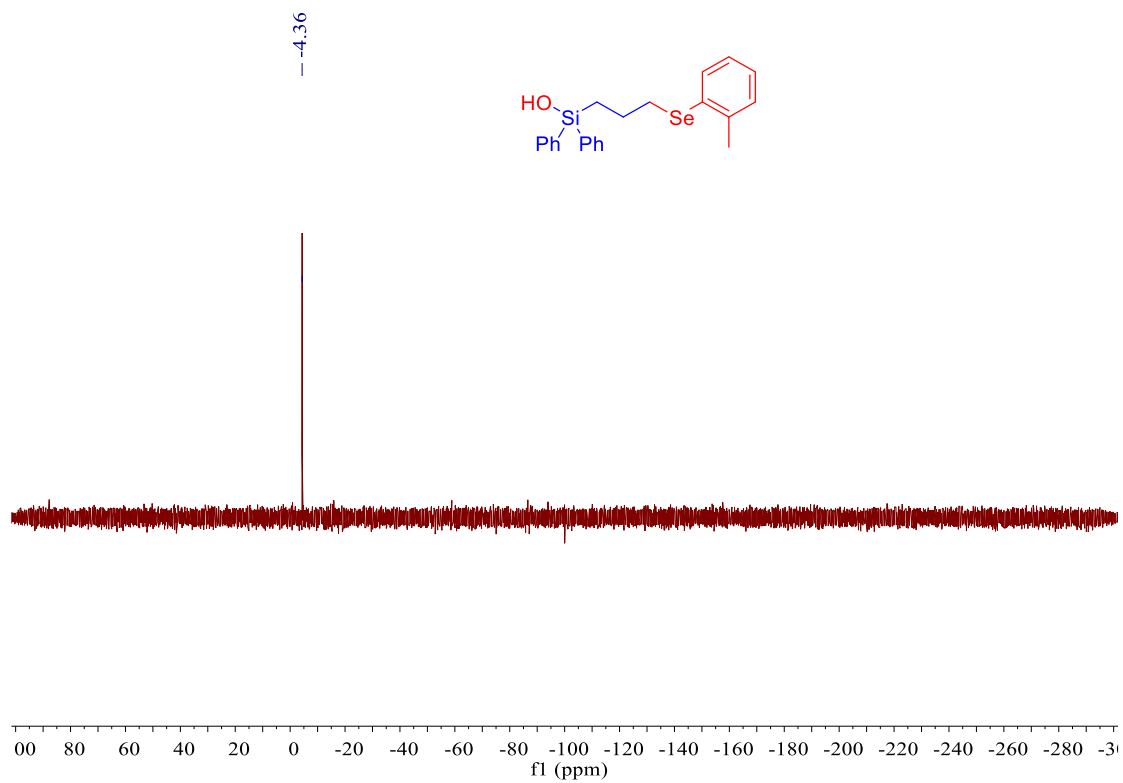

### $^1\text{H}$ NMR Spectra of **3p** (400 MHz, $\text{CDCl}_3$ )

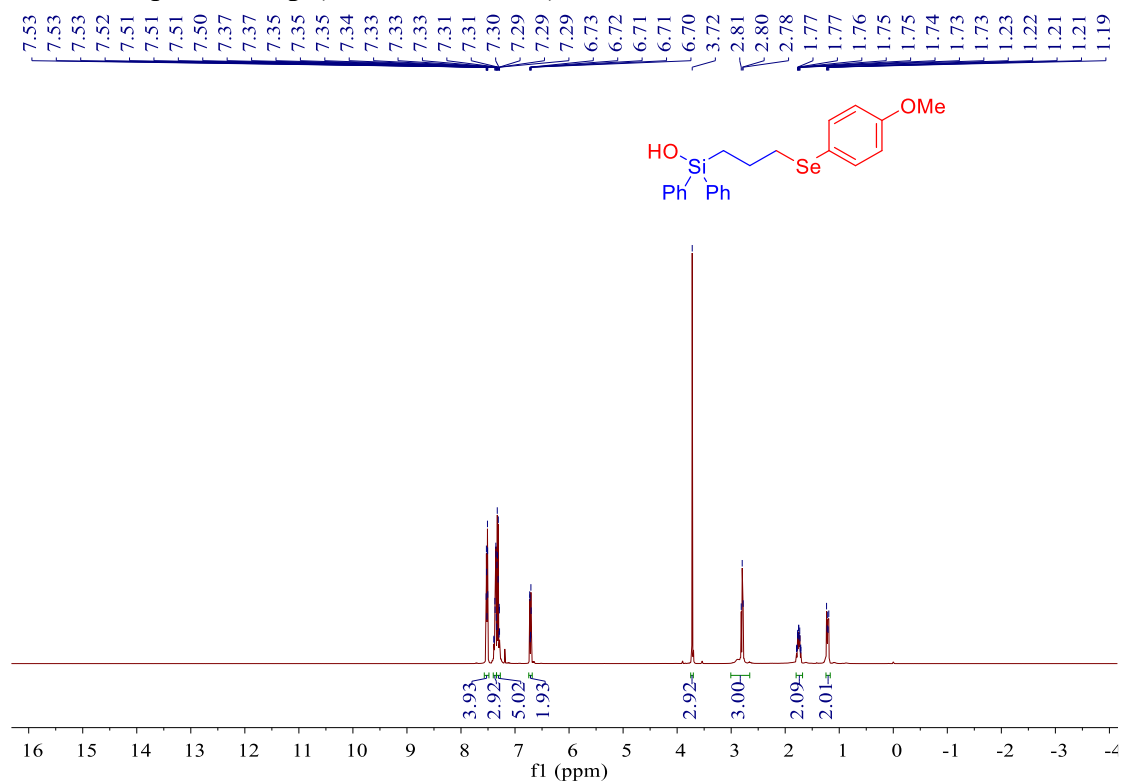

### $^{13}\text{C}$ NMR Spectra of **3p** (100 MHz, $\text{CDCl}_3$ )

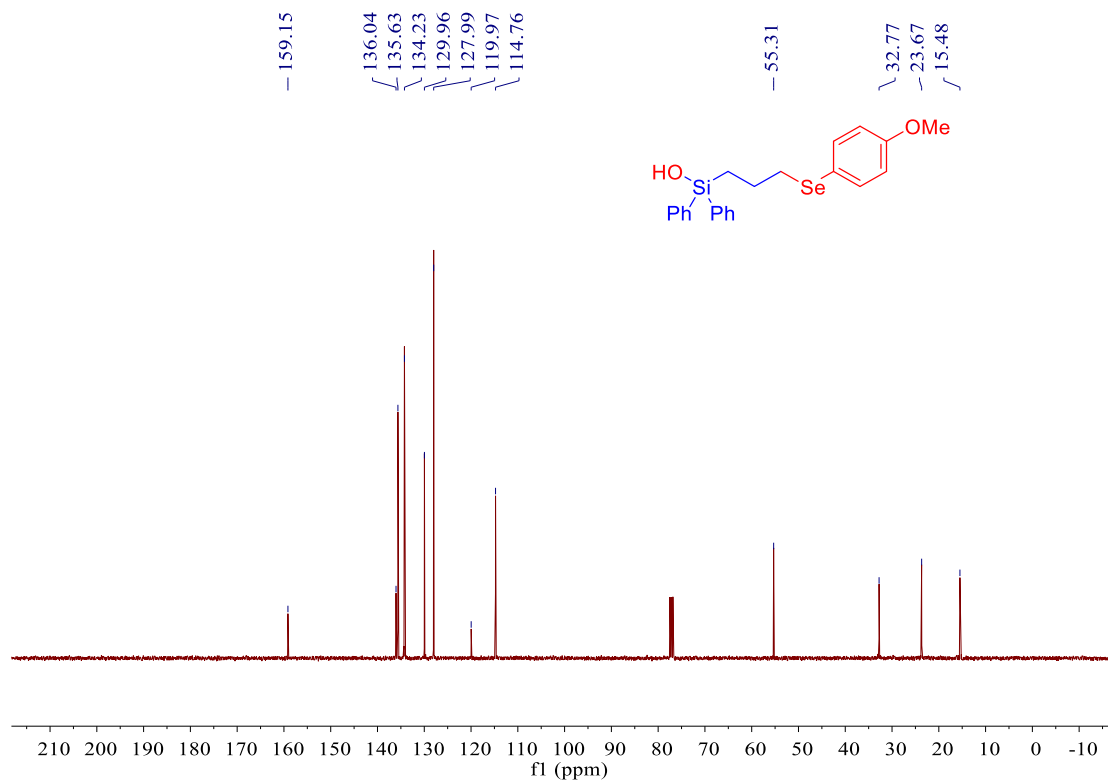

<sup>77</sup>Se NMR Spectra of **3p** (100 MHz, CDCl<sub>3</sub>)

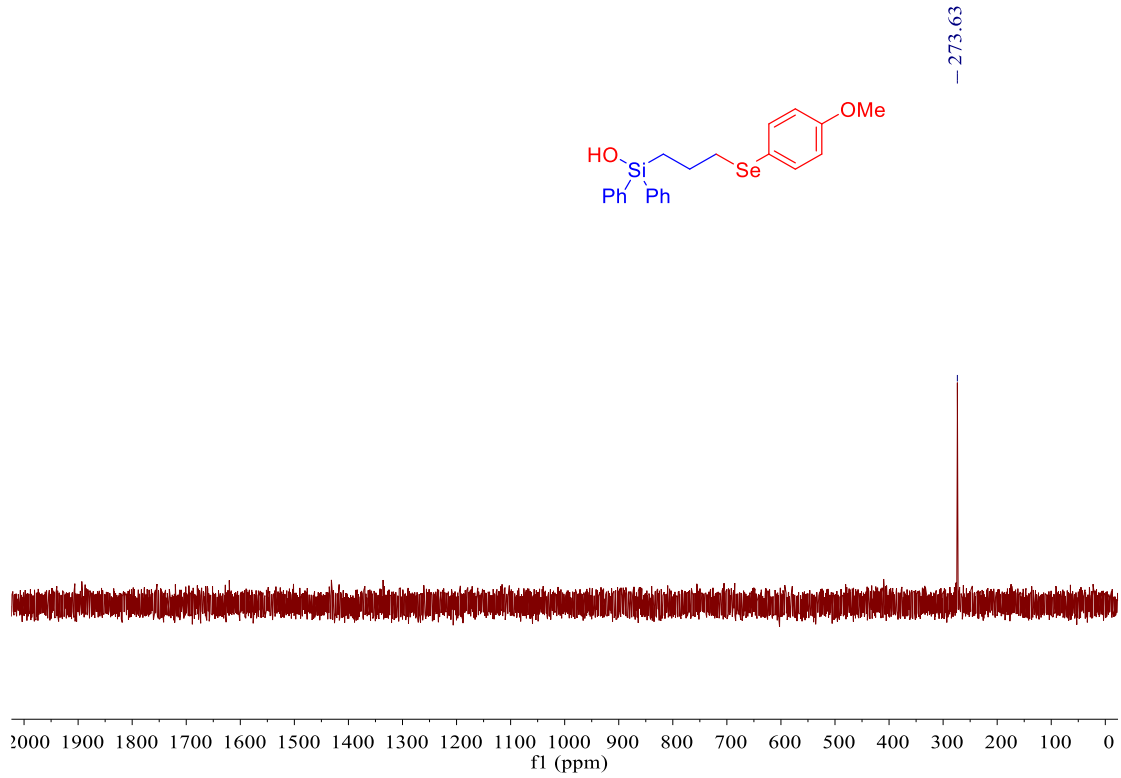

<sup>1</sup>H NMR Spectra of **3q** (400 MHz, CDCl<sub>3</sub>)

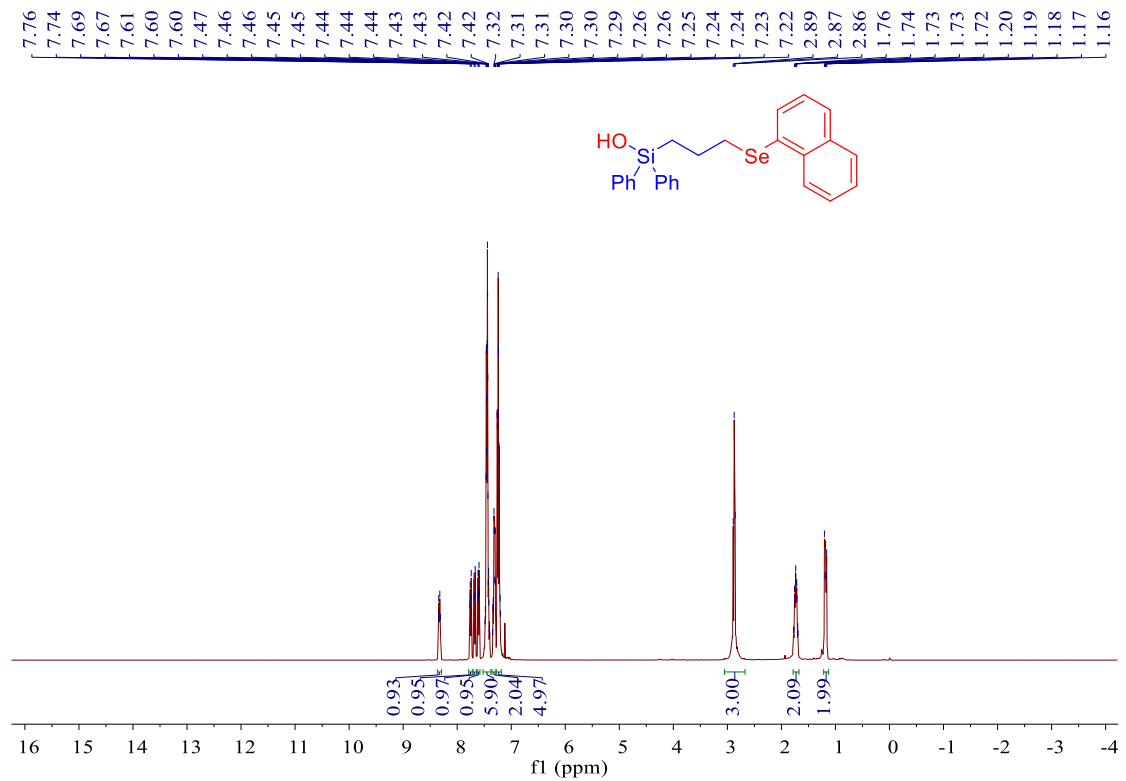

<sup>13</sup>C NMR Spectra of **3q** (100 MHz, CDCl<sub>3</sub>)

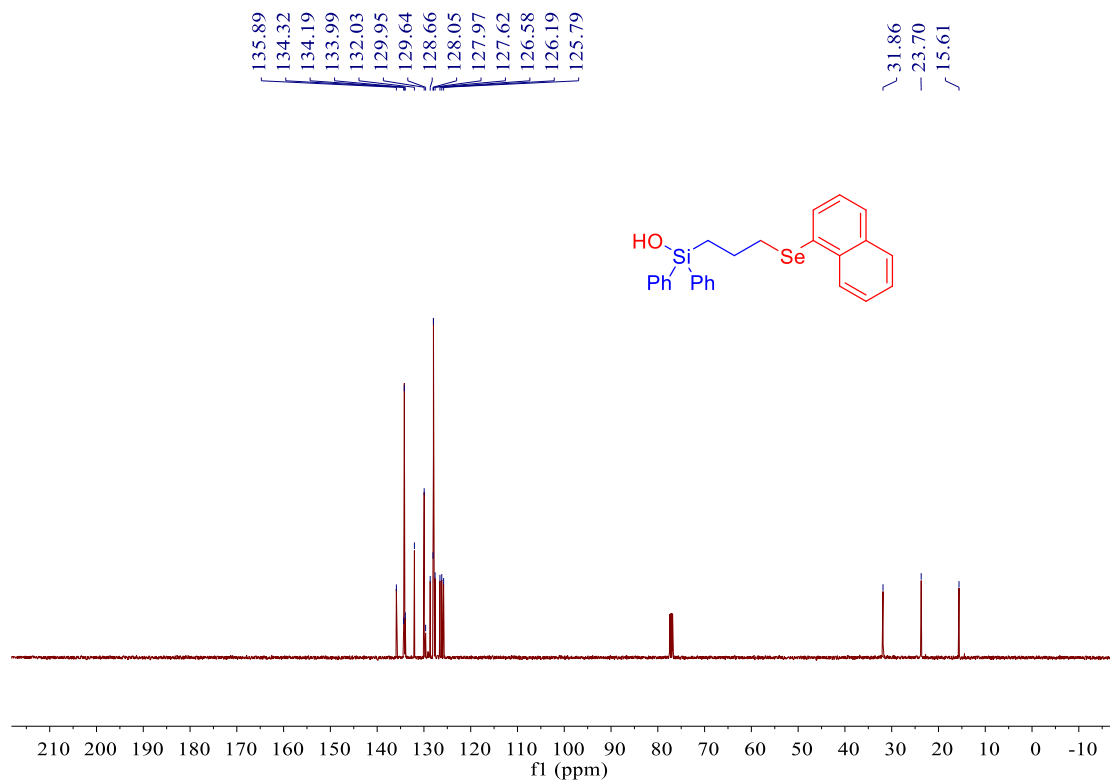

<sup>75</sup>Se NMR Spectra of **3q** (400 MHz, CDCl<sub>3</sub>)

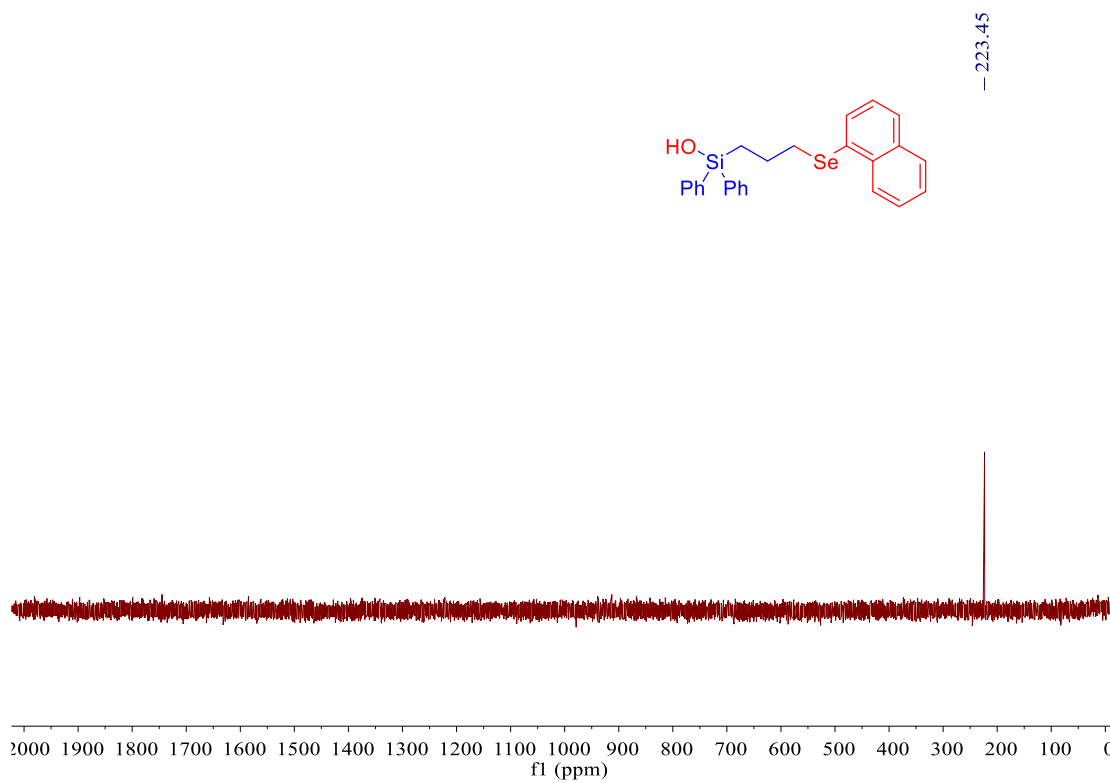

### $^1\text{H}$ NMR Spectra of **3r** (400 MHz, $\text{CDCl}_3$ )

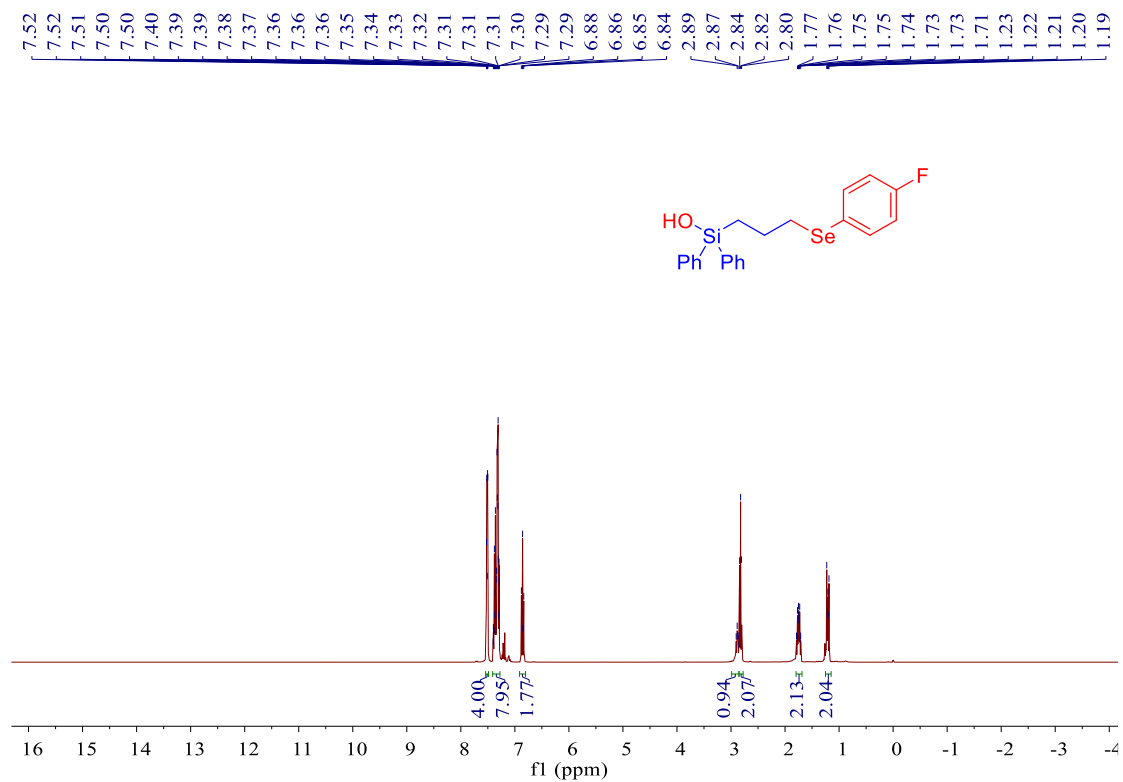

### $^{13}\text{C}$ NMR Spectra of **3r** (100 MHz, $\text{CDCl}_3$ )

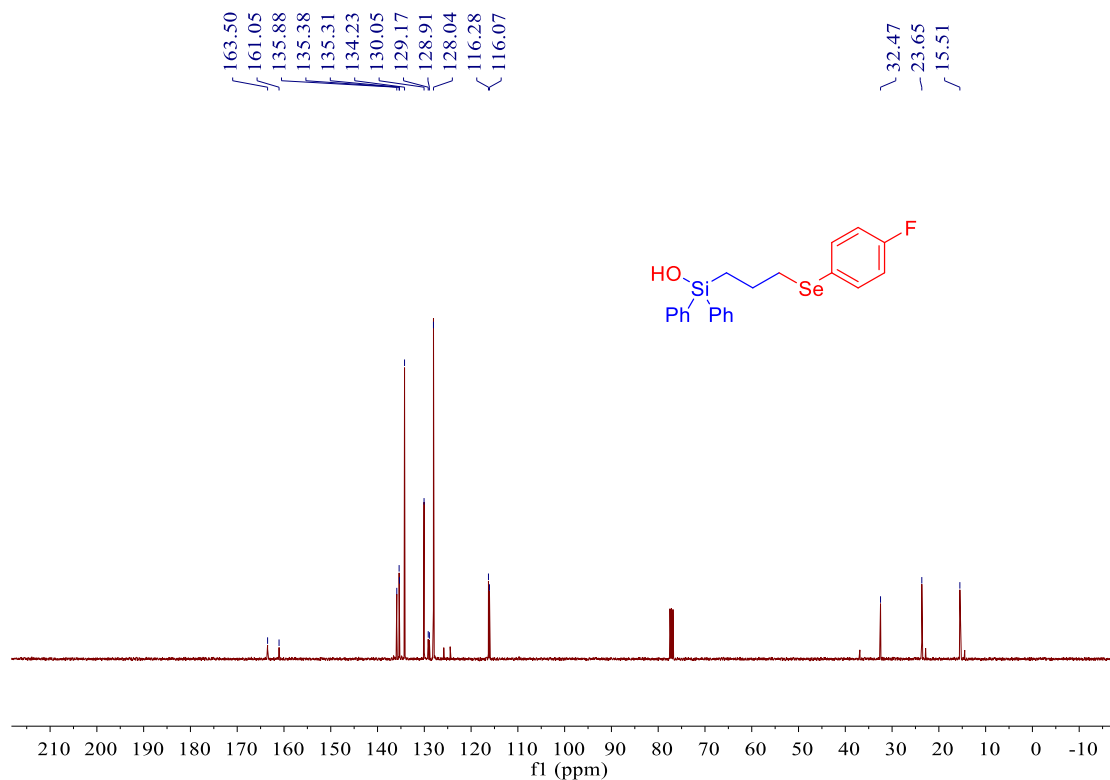



<sup>77</sup>Se NMR Spectra of **3r** (400 MHz, CDCl<sub>3</sub>)

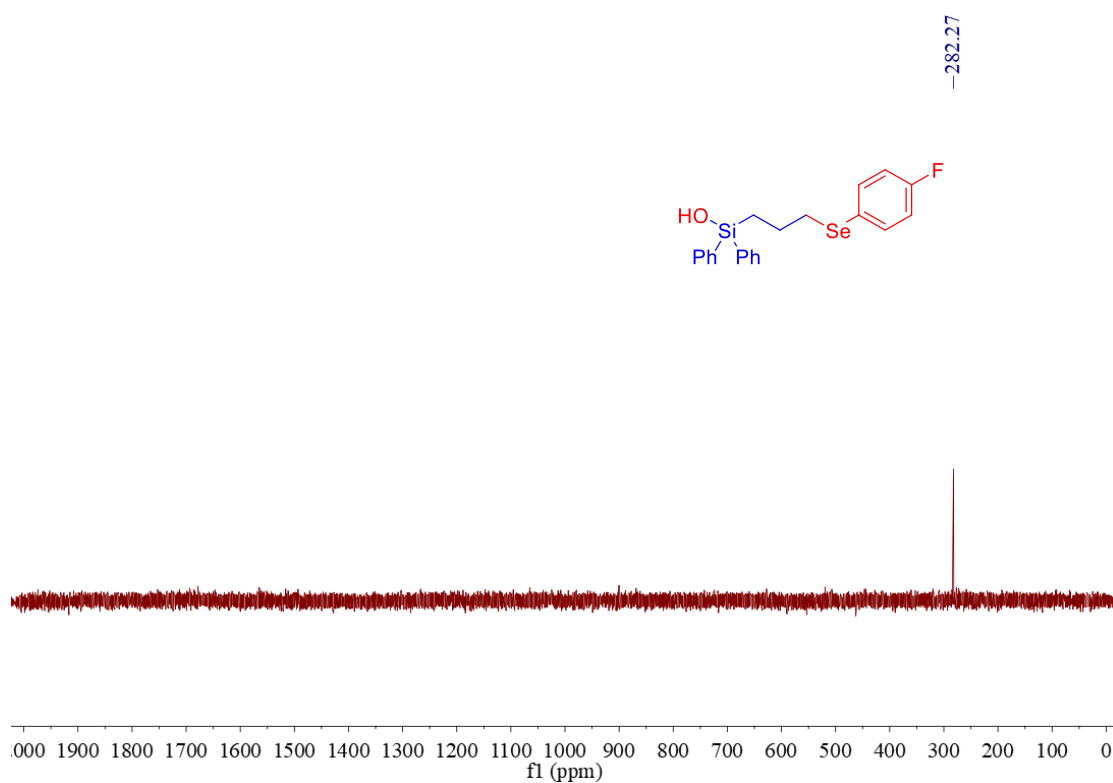

<sup>1</sup>H NMR Spectra of **3s** (400 MHz, CDCl<sub>3</sub>)

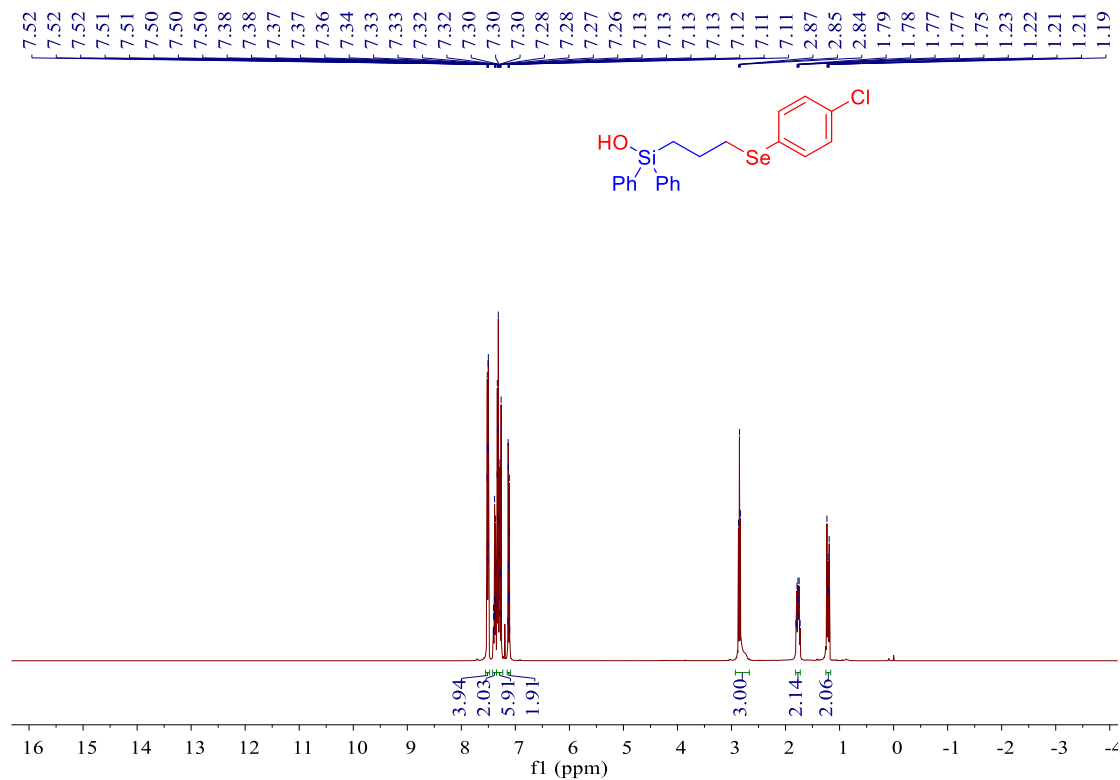

<sup>13</sup>C NMR Spectra of **3s** (100 MHz, CDCl<sub>3</sub>)

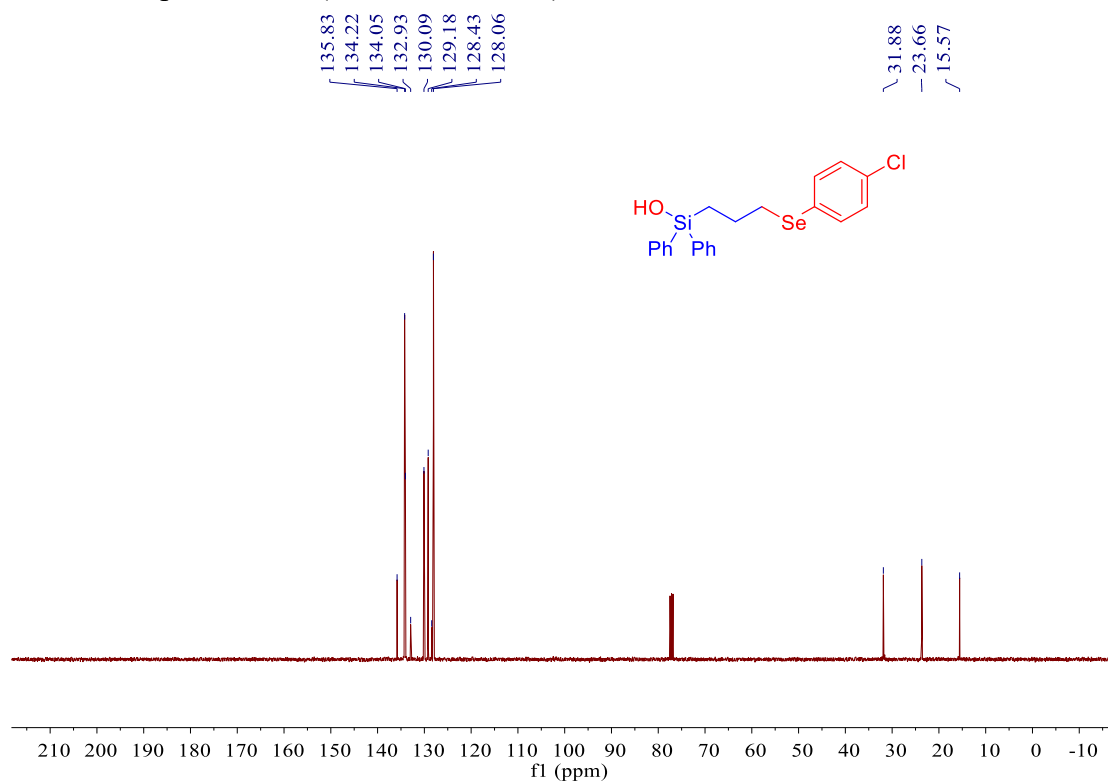

<sup>77</sup>Se NMR Spectra of **3s** (100 MHz, CDCl<sub>3</sub>)

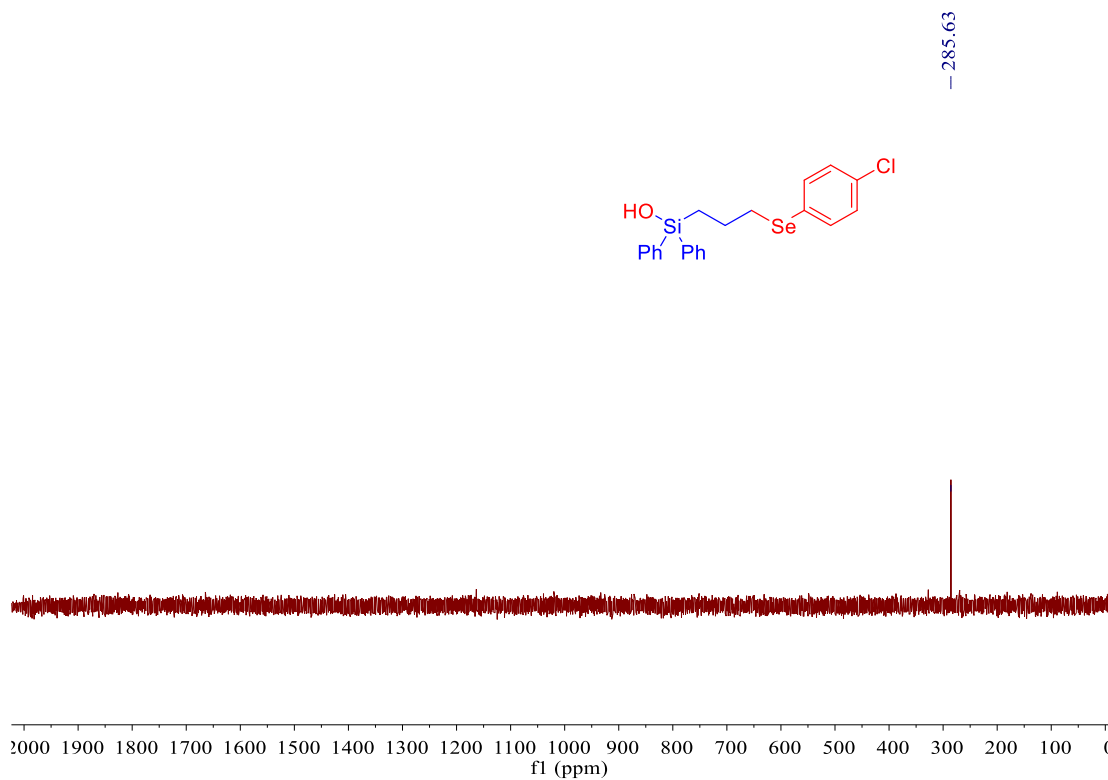

### $^1\text{H}$ NMR Spectra of **3t** (400 MHz, $\text{CDCl}_3$ )

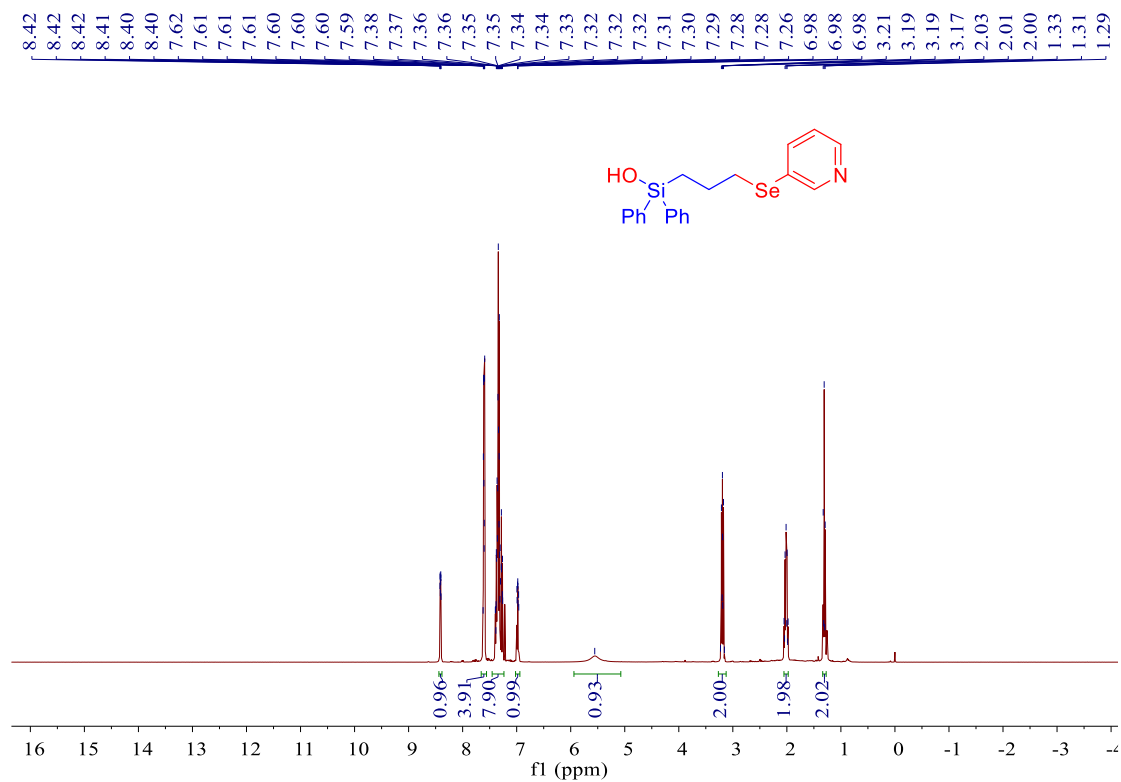

### $^{13}\text{C}$ NMR Spectra of **3t** (100 MHz, $\text{CDCl}_3$ )

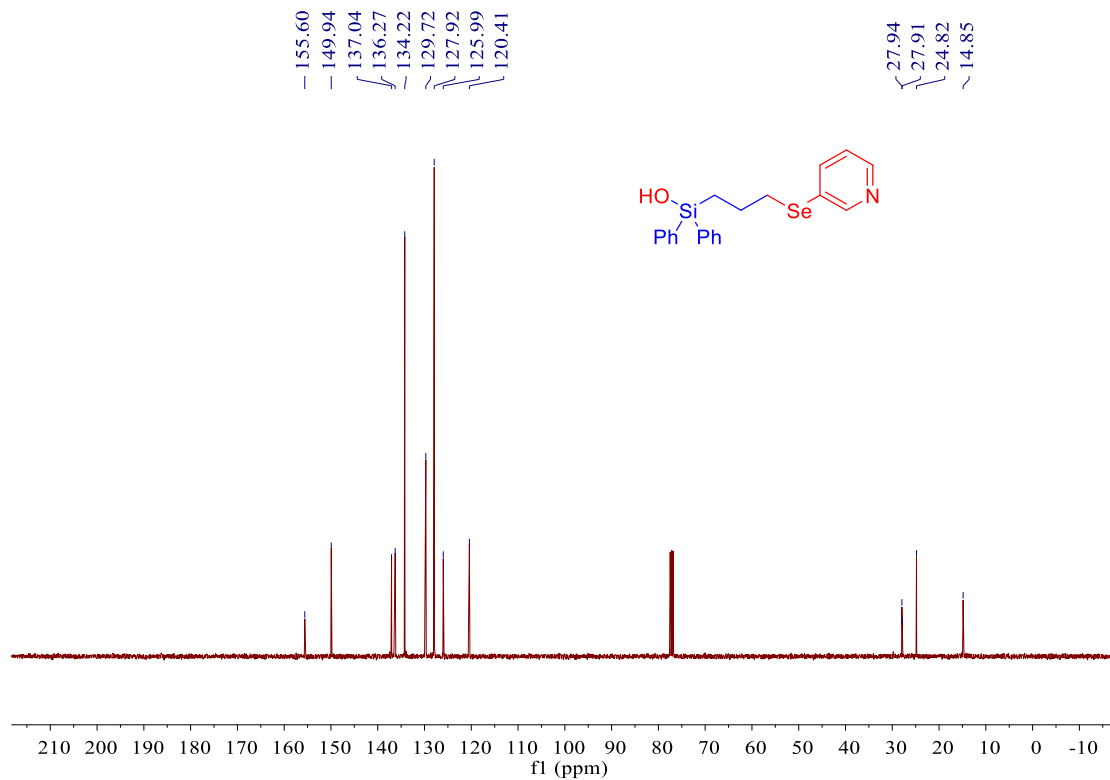

<sup>77</sup>Se NMR Spectra of **3t** (100 MHz, CDCl<sub>3</sub>)

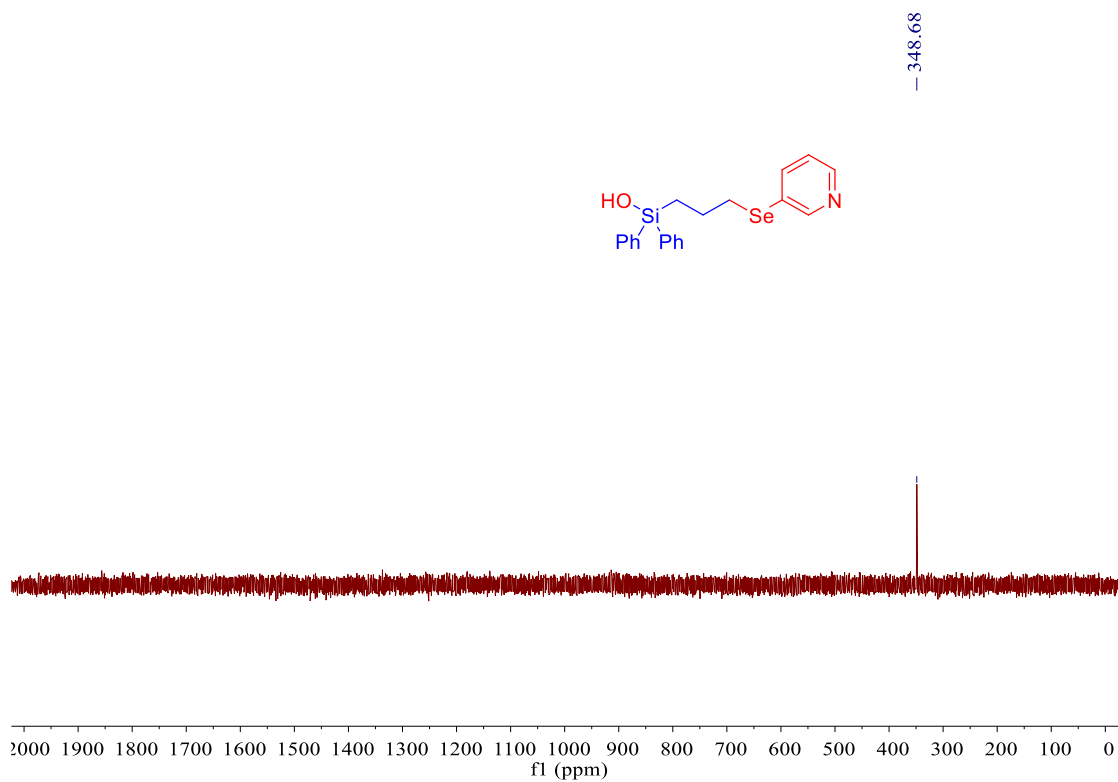

<sup>1</sup>H NMR Spectra of **5a** (400 MHz, CDCl<sub>3</sub>)

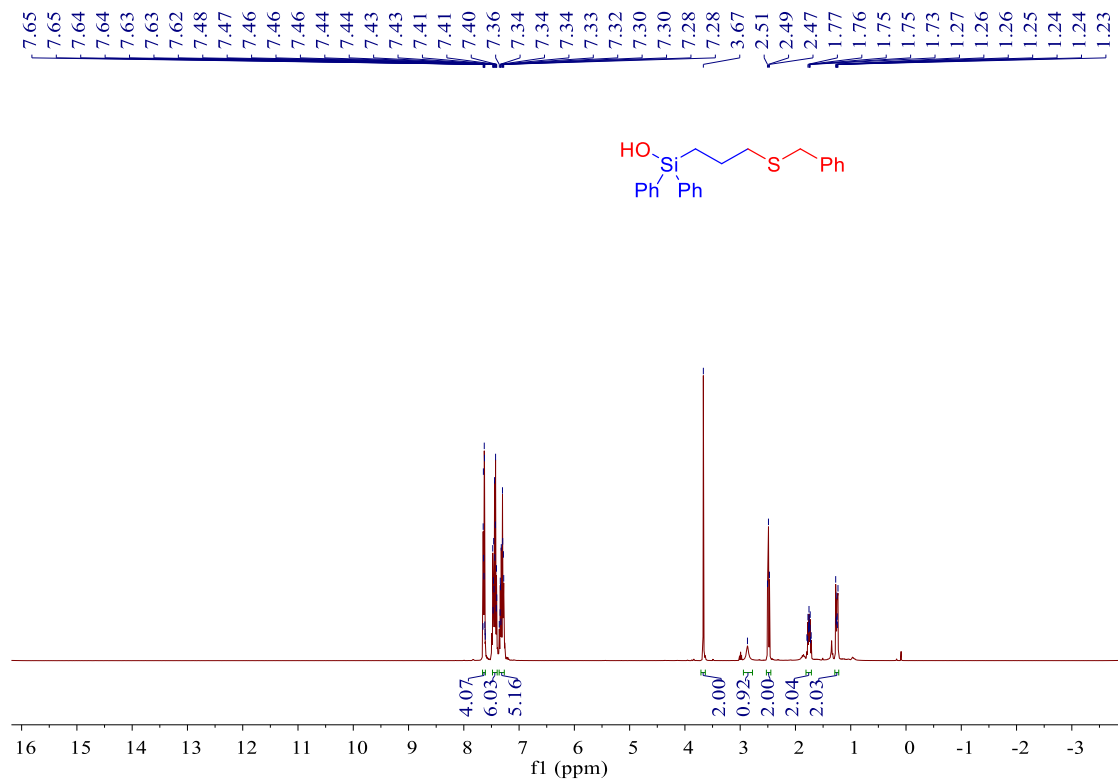

<sup>13</sup>C NMR Spectra of **5a** (100 MHz, CDCl<sub>3</sub>)

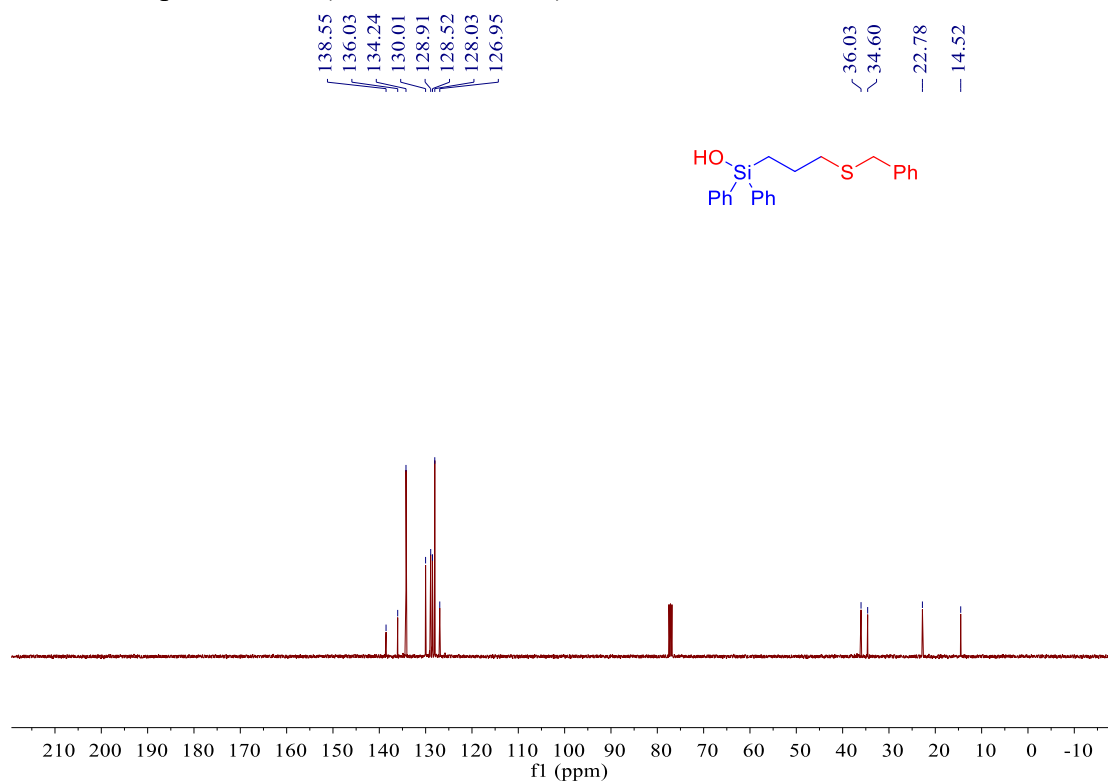

<sup>1</sup>H NMR Spectra of **5b** (400 MHz, CDCl<sub>3</sub>)

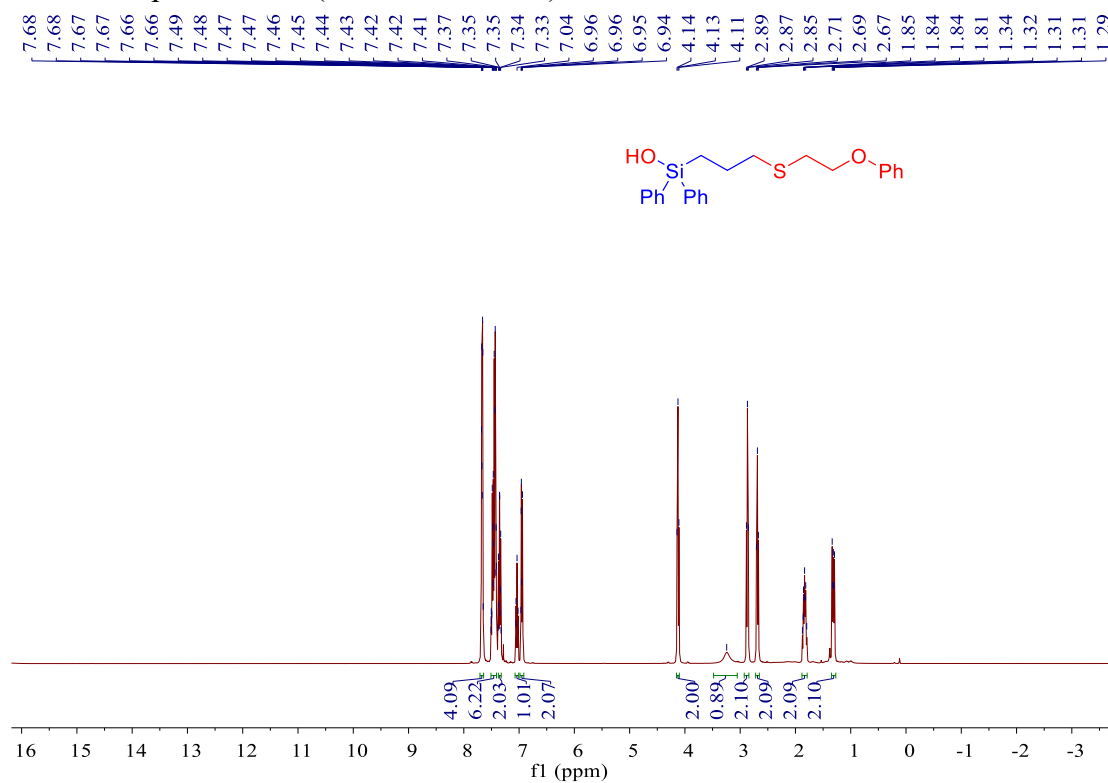

<sup>13</sup>C NMR Spectra of **5b** (100 MHz, CDCl<sub>3</sub>)

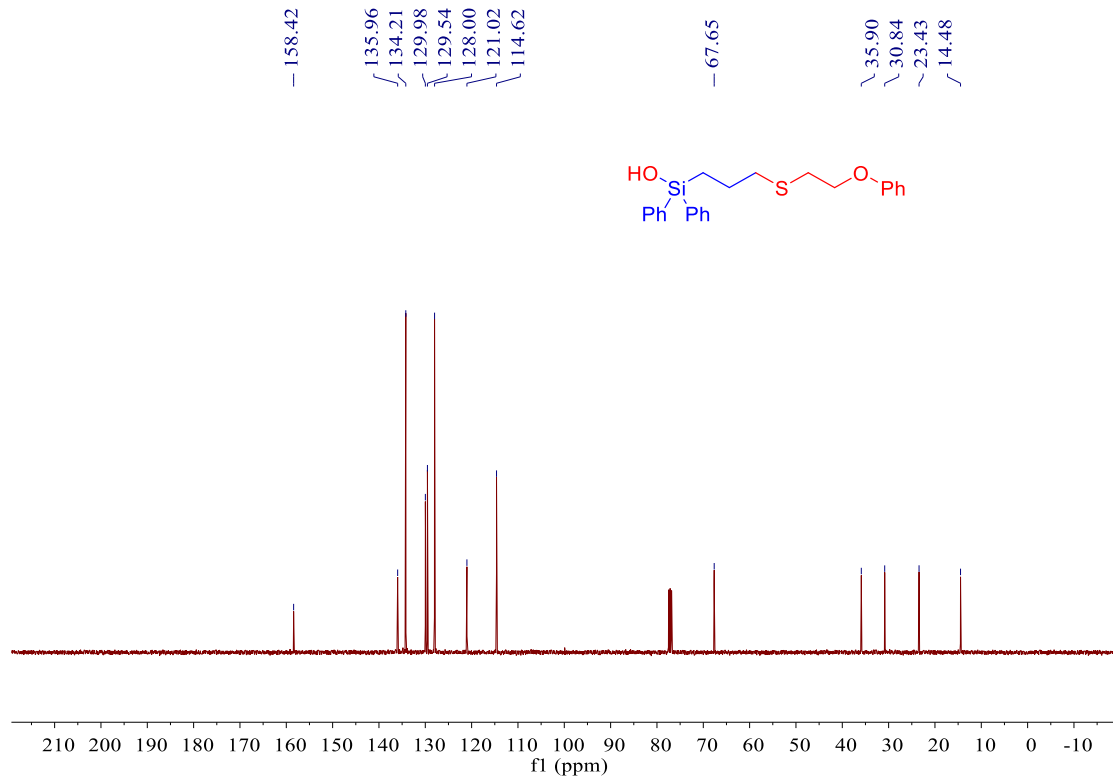

<sup>1</sup>H NMR Spectra of **5c** (400 MHz, CDCl<sub>3</sub>)

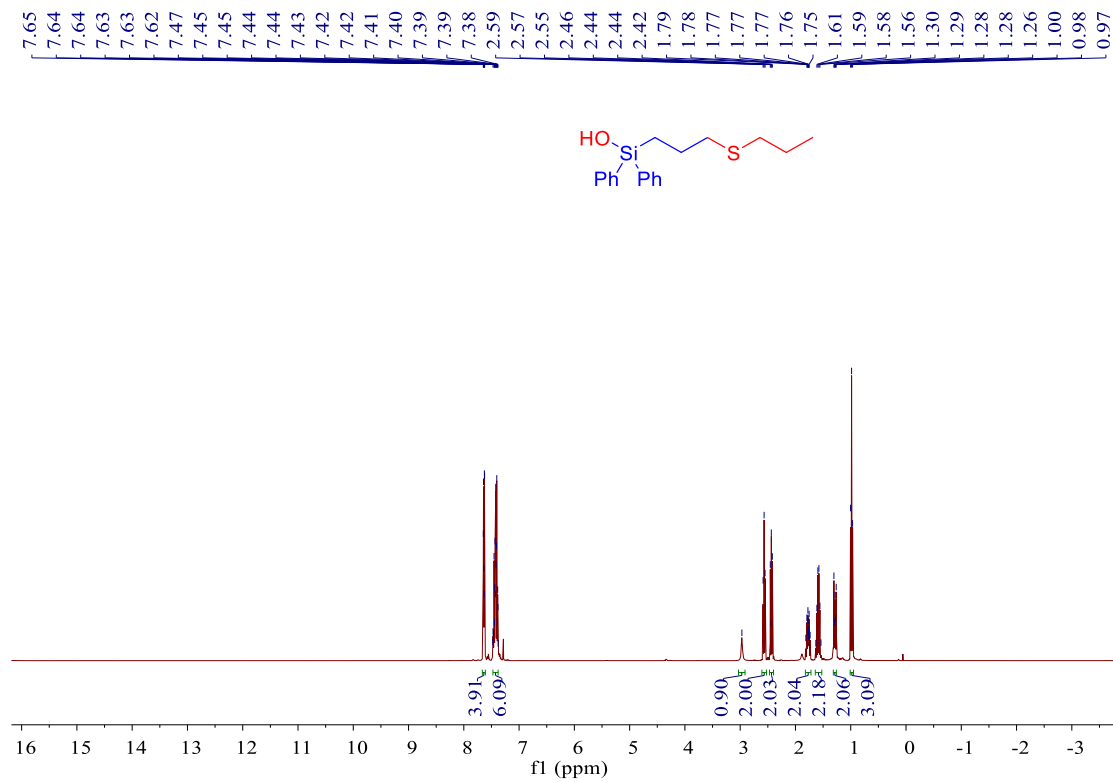

<sup>13</sup>C NMR Spectra of **5c** (100 MHz, CDCl<sub>3</sub>)

136.12  
134.25  
129.99  
128.02

35.40  
34.06  
23.26  
23.05  
14.59  
13.62

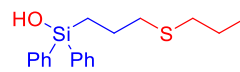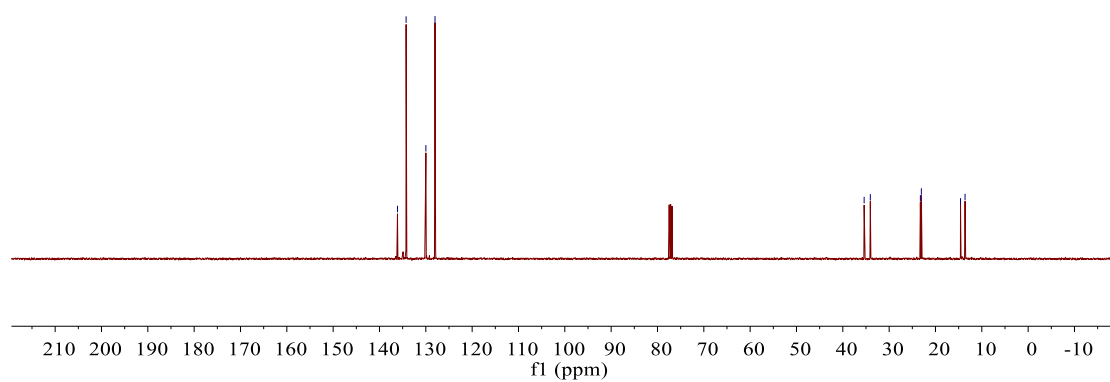

<sup>29</sup>Si NMR Spectra of **5c** (79 MHz, CDCl<sub>3</sub>)

-4.10

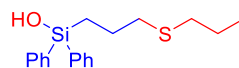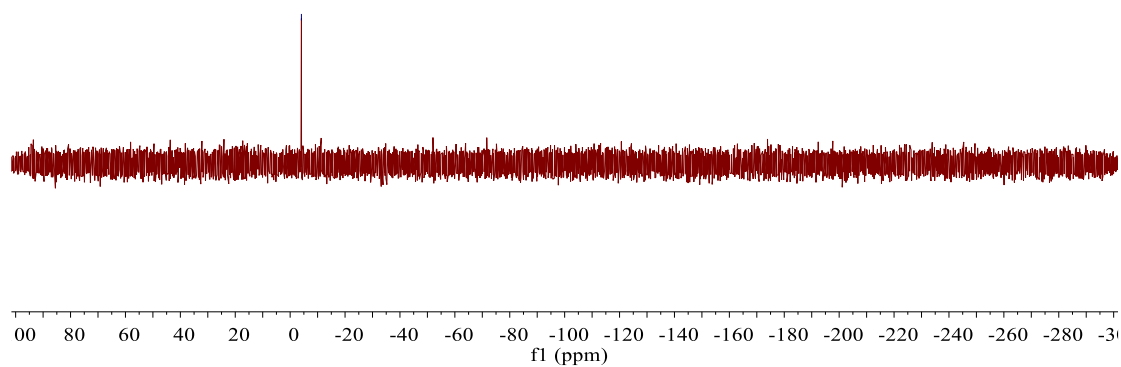

### $^1\text{H}$ NMR Spectra of **5d** (400 MHz, $\text{CDCl}_3$ )

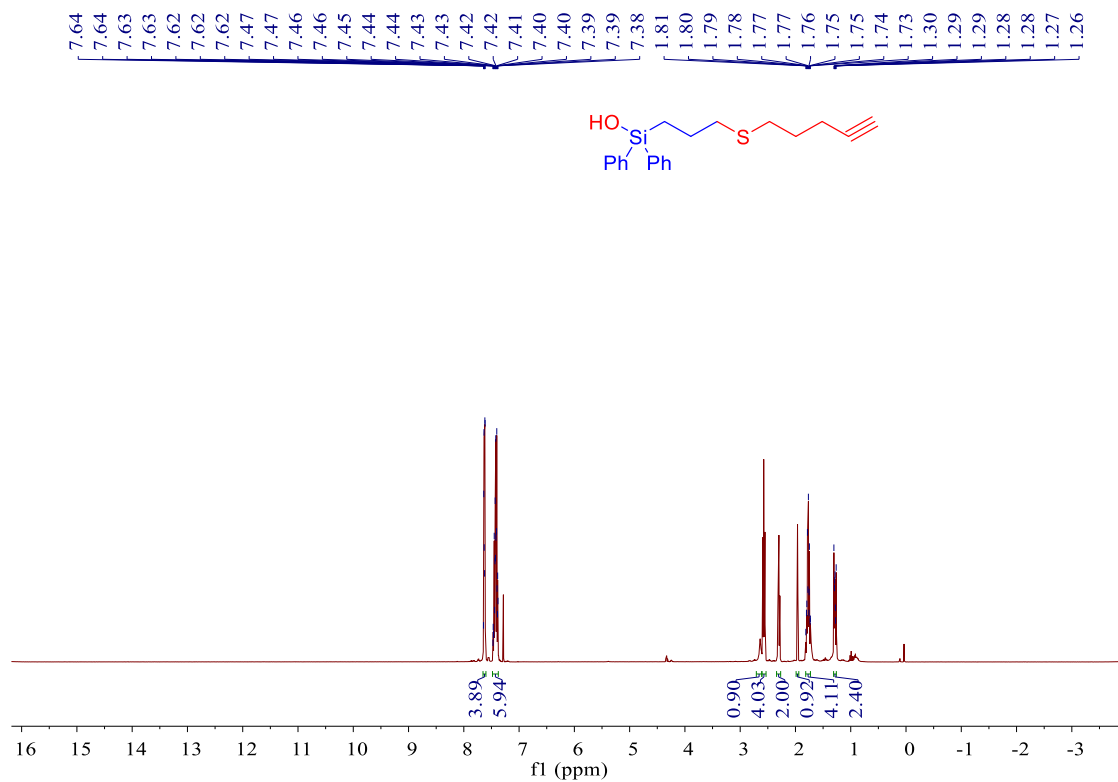

### $^{13}\text{C}$ NMR Spectra of **5d** (100 MHz, $\text{CDCl}_3$ )

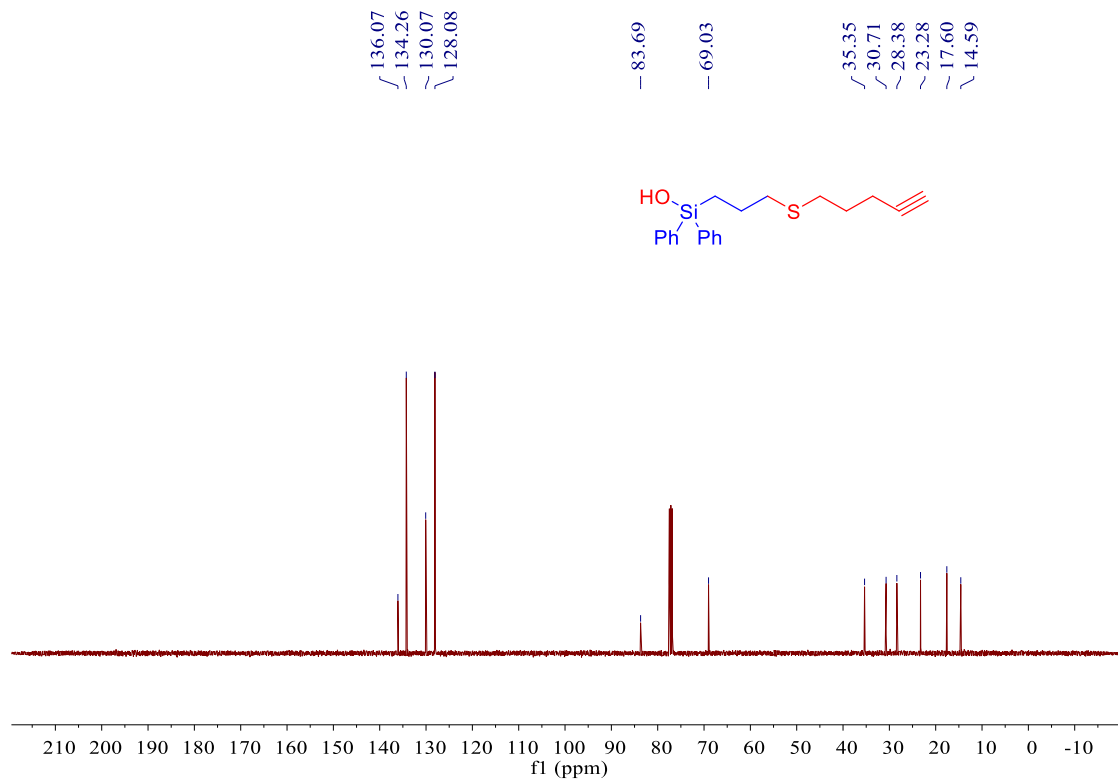



### <sup>1</sup>H NMR Spectra of **5e** (400 MHz, CDCl<sub>3</sub>)

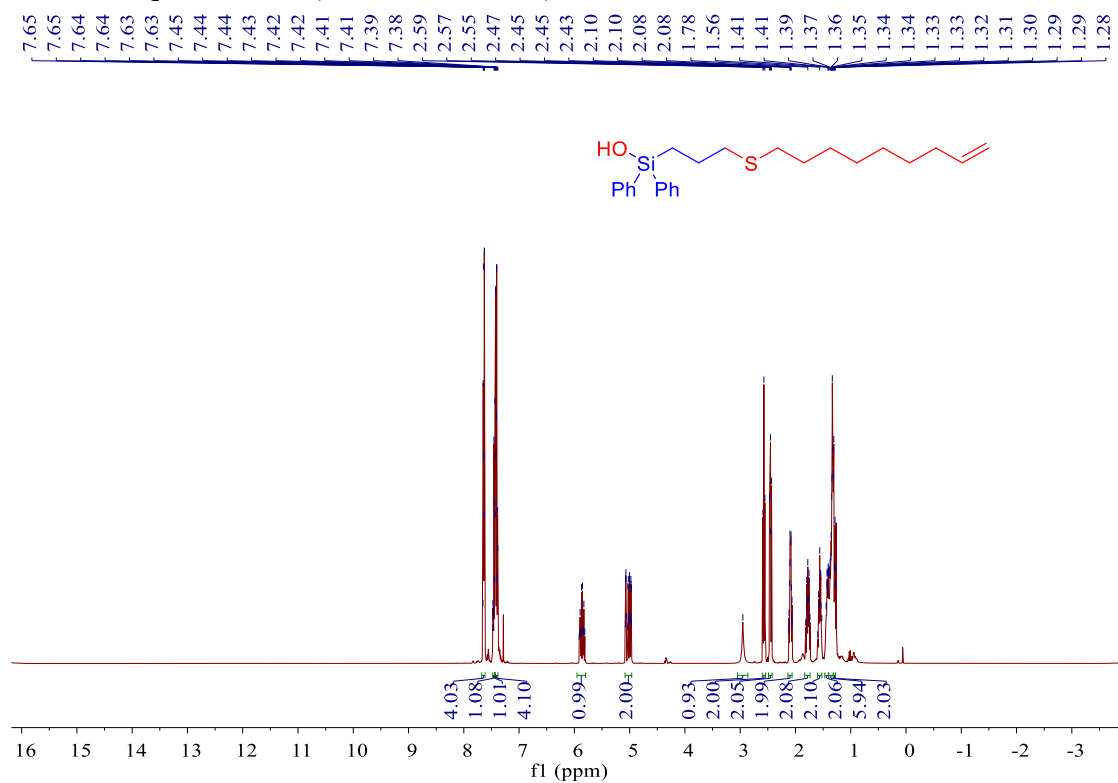

### <sup>13</sup>C NMR Spectra of **5e** (100 MHz, CDCl<sub>3</sub>)

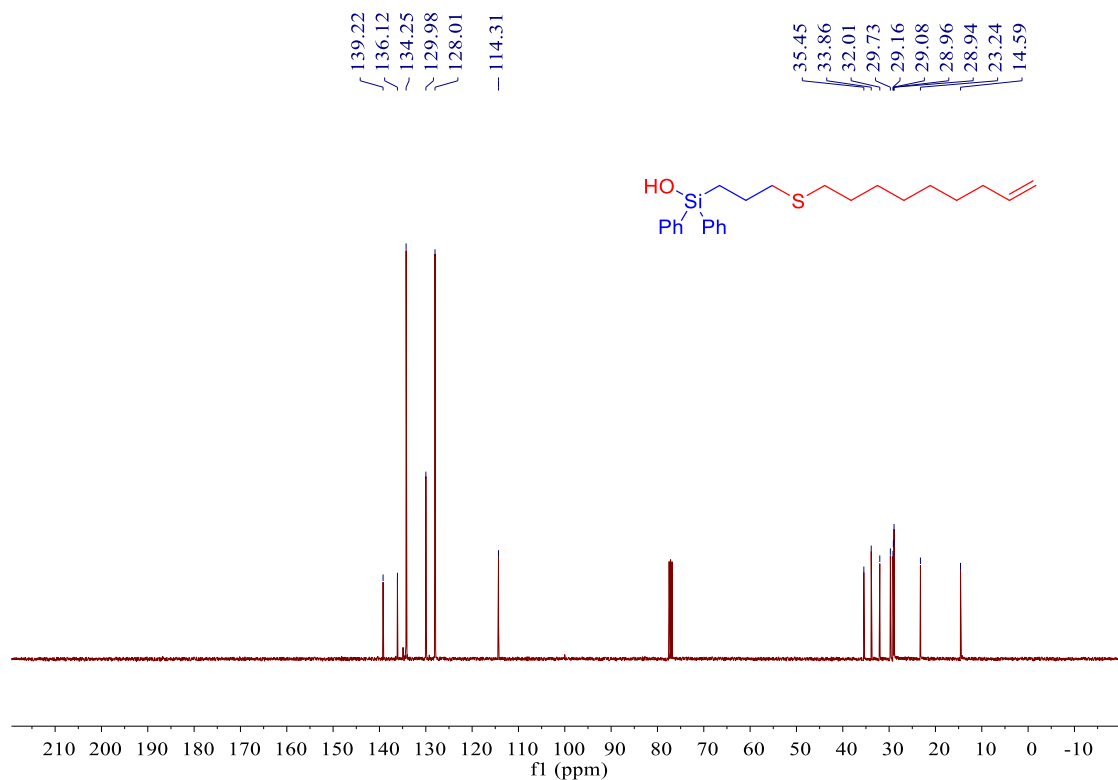

### <sup>1</sup>H NMR Spectra of **5f** (400 MHz, CDCl<sub>3</sub>)

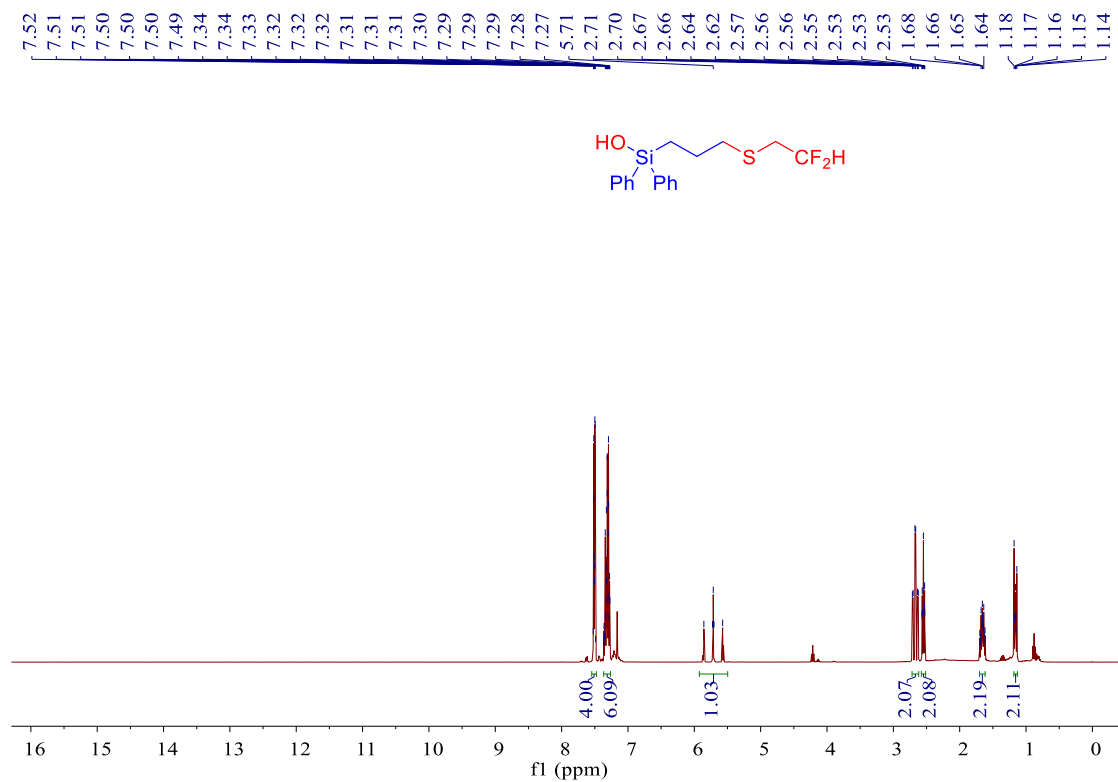

### <sup>13</sup>C NMR Spectra of **5f** (100 MHz, CDCl<sub>3</sub>)

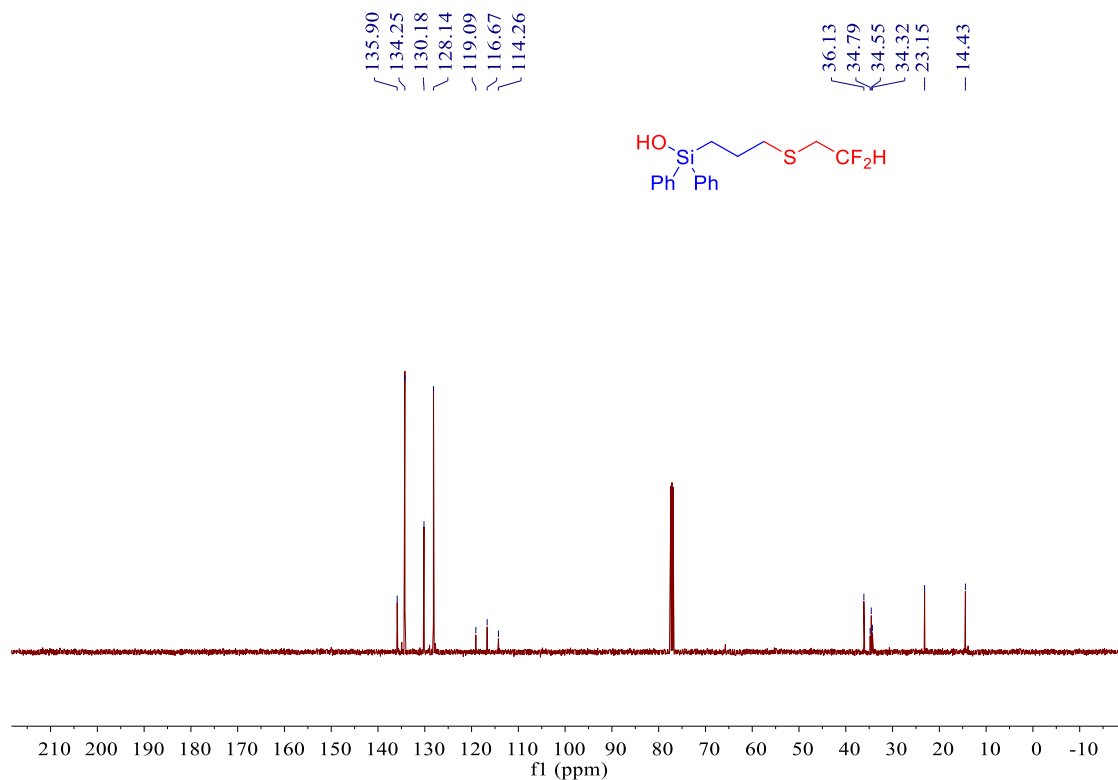

<sup>19</sup>F NMR Spectra of **5f** (100 MHz, CDCl<sub>3</sub>)

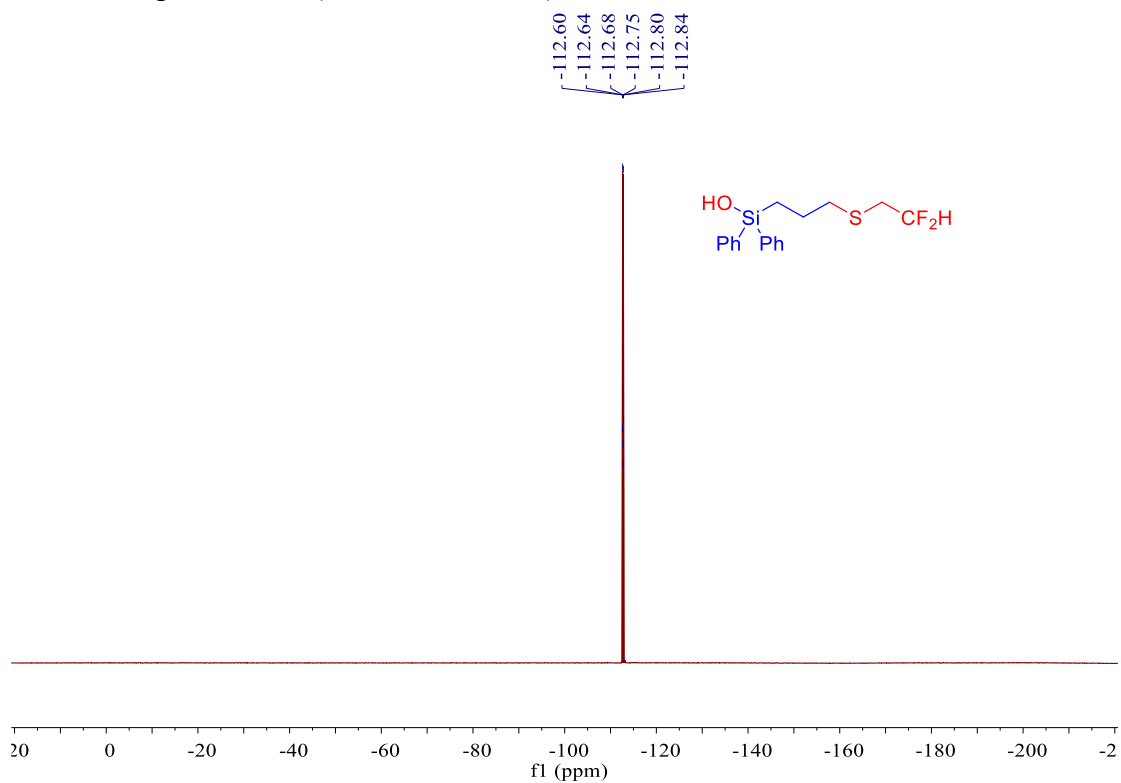

<sup>1</sup>H NMR Spectra of **5g** (400 MHz, CDCl<sub>3</sub>)

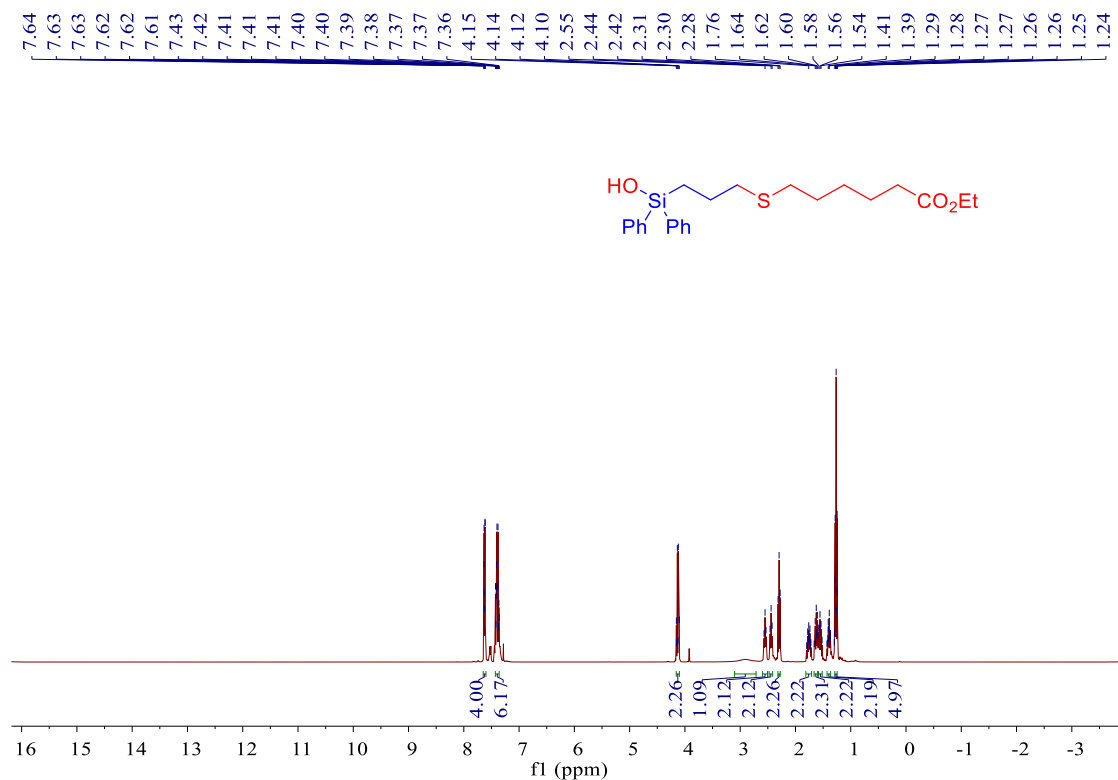

<sup>13</sup>C NMR Spectra of **5g** (100 MHz, CDCl<sub>3</sub>)

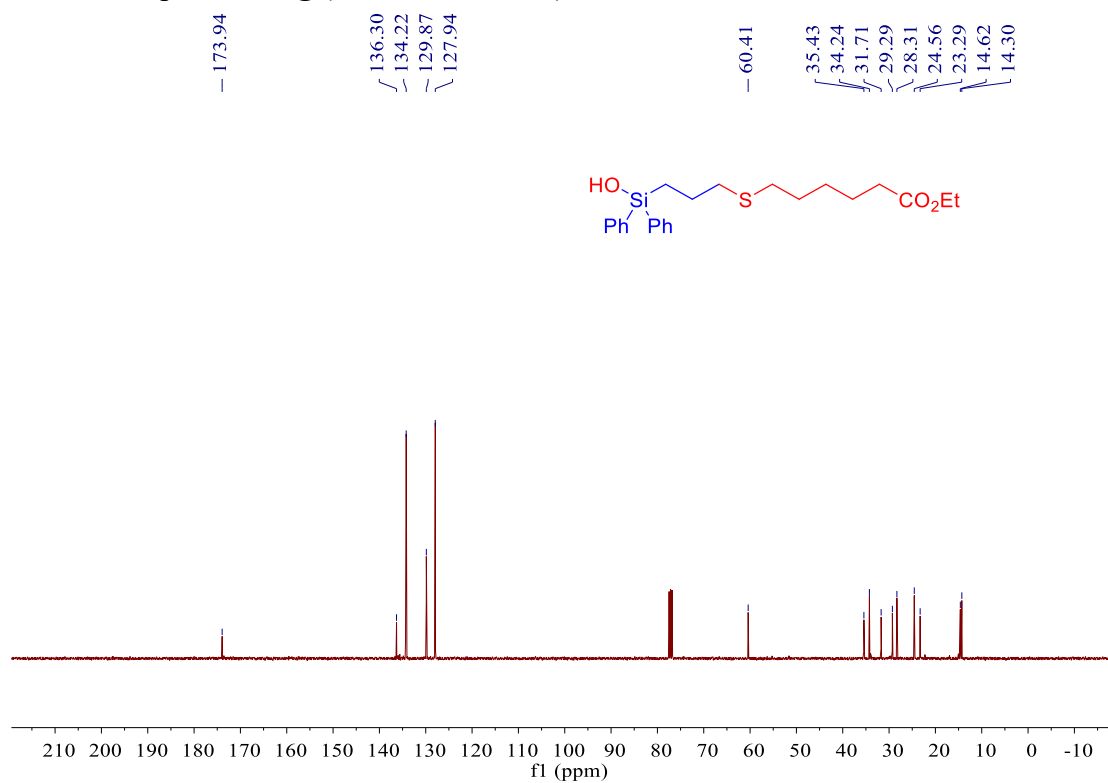

<sup>1</sup>H NMR Spectra of **5h** (400 MHz, CDCl<sub>3</sub>)

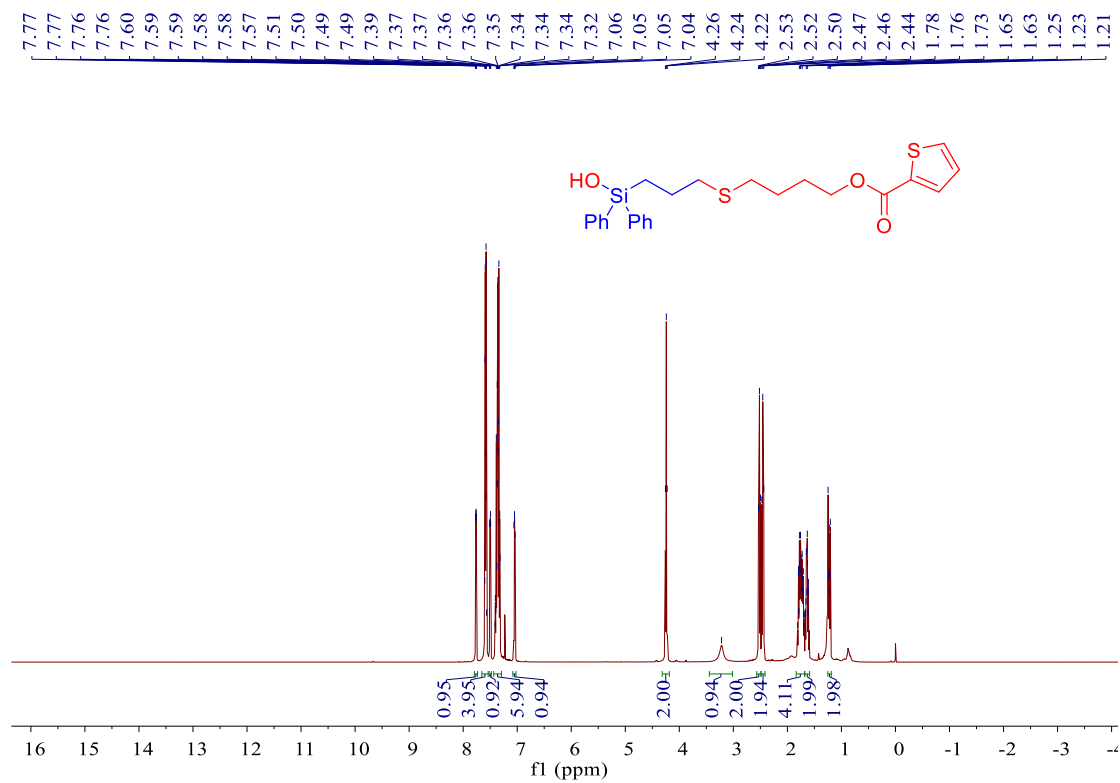

<sup>13</sup>C NMR Spectra of **5h** (100 MHz, CDCl<sub>3</sub>)

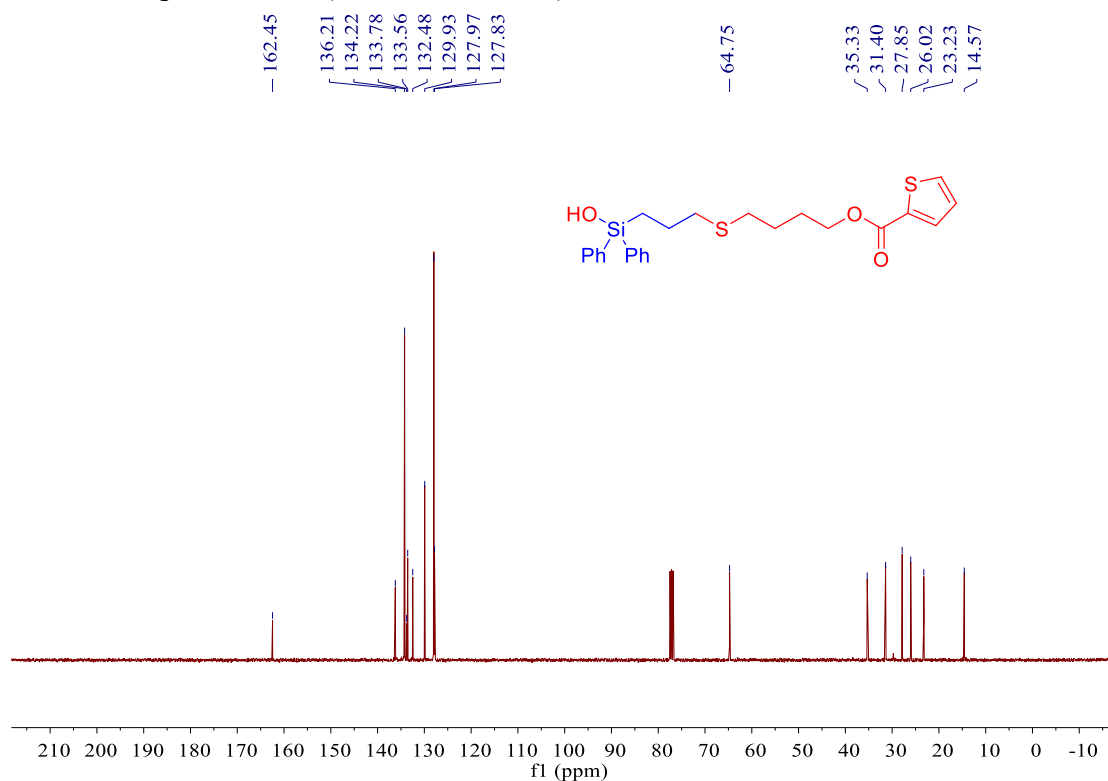

<sup>1</sup>H NMR Spectra of **5j** (400 MHz, CDCl<sub>3</sub>)

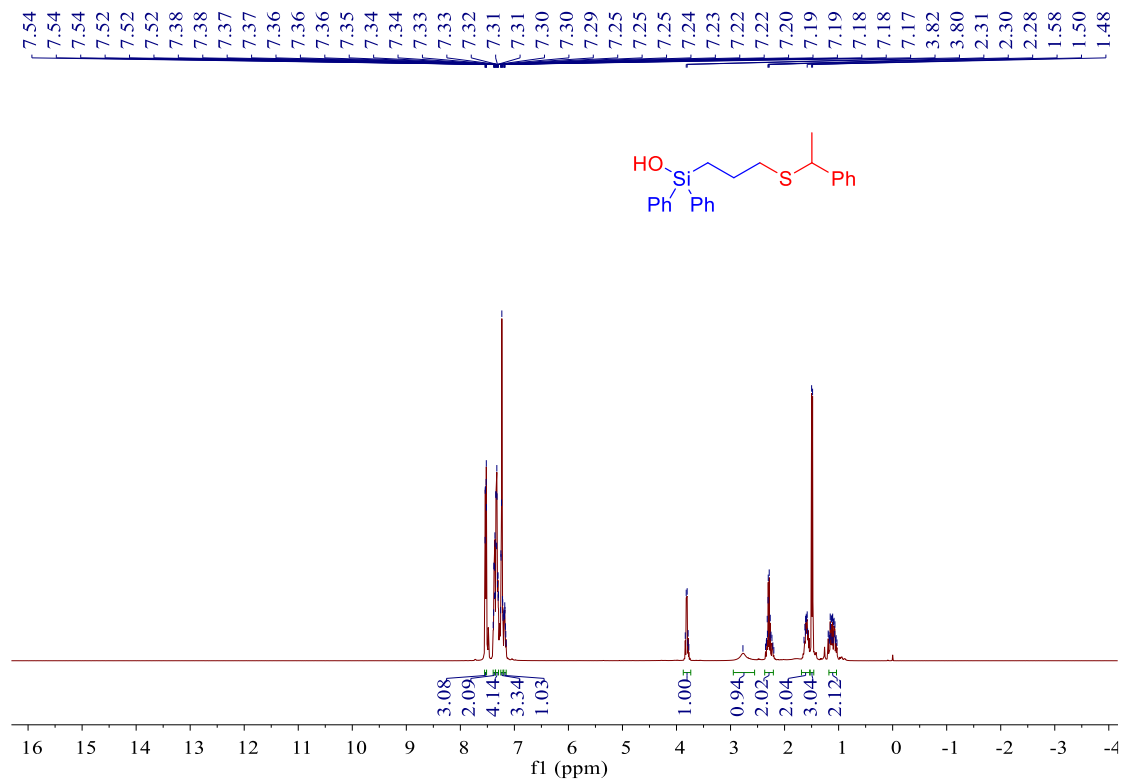

<sup>13</sup>C NMR Spectra of **5j** (100 MHz, CDCl<sub>3</sub>)

144.12  
136.09  
134.24  
129.96  
128.50  
127.99  
127.31  
127.04

43.85  
34.56  
22.95  
22.66  
14.58

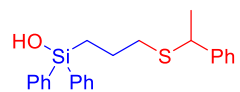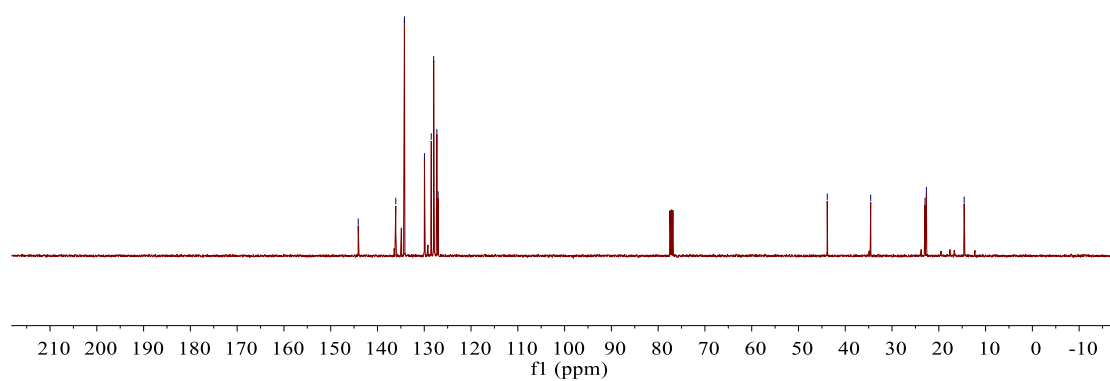

<sup>1</sup>H NMR Spectra of **5m** (400 MHz, CDCl<sub>3</sub>)

7.57  
7.57  
7.56  
7.56  
7.55  
7.55  
7.54  
7.37  
7.37  
7.36  
7.35  
7.35  
7.34  
7.34  
7.33  
7.32  
7.32  
7.31  
7.30  
7.26  
7.24  
7.24  
7.23  
7.22  
6.92  
6.92  
6.85  
6.84  
6.84  
6.84  
6.82  
6.82  
6.82  
4.10  
4.09  
4.07  
2.79  
2.77  
2.76  
2.66  
2.64  
2.62  
1.24  
1.22  
1.20

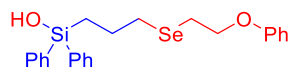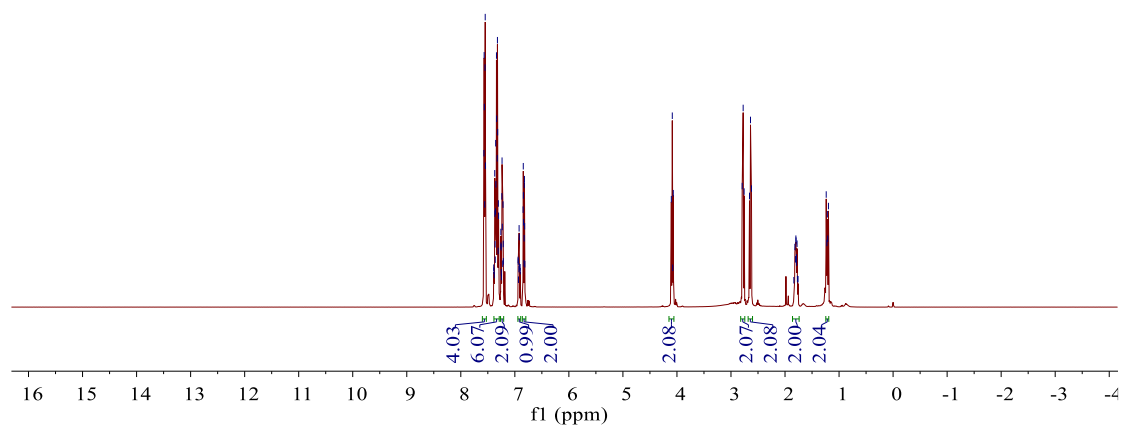

<sup>13</sup>C NMR Spectra of **5m** (100 MHz, CDCl<sub>3</sub>)

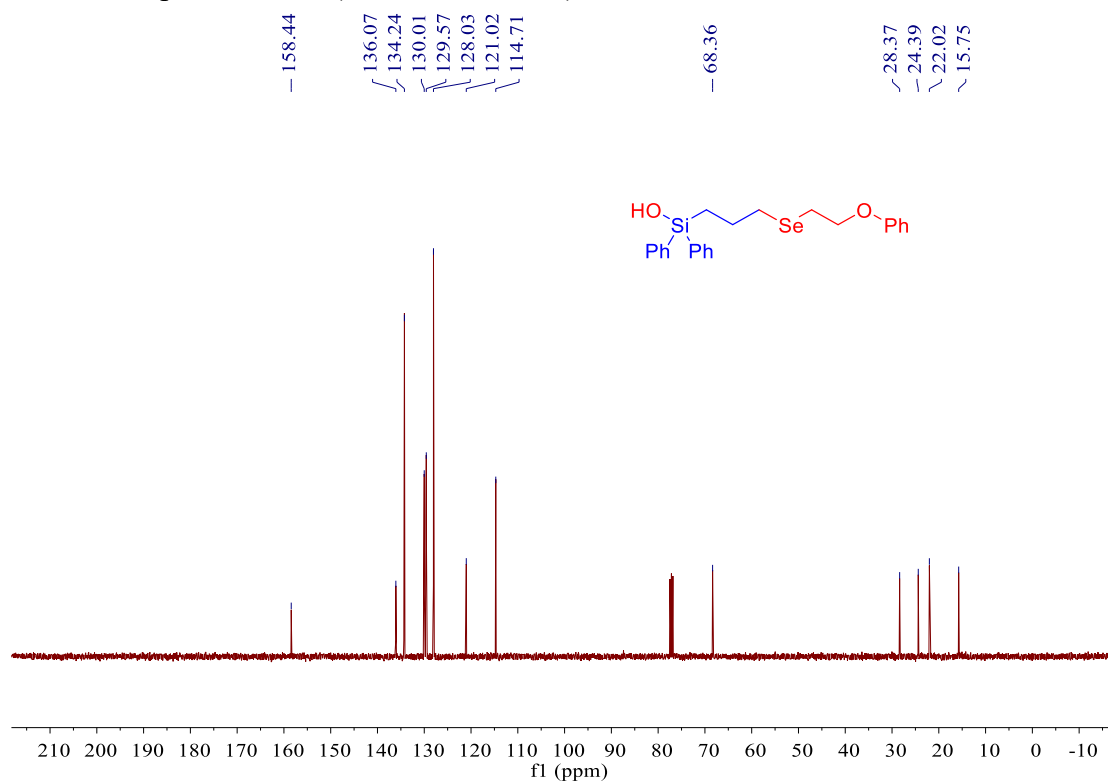

<sup>77</sup>Se NMR Spectra of **5m** (100 MHz, CDCl<sub>3</sub>)

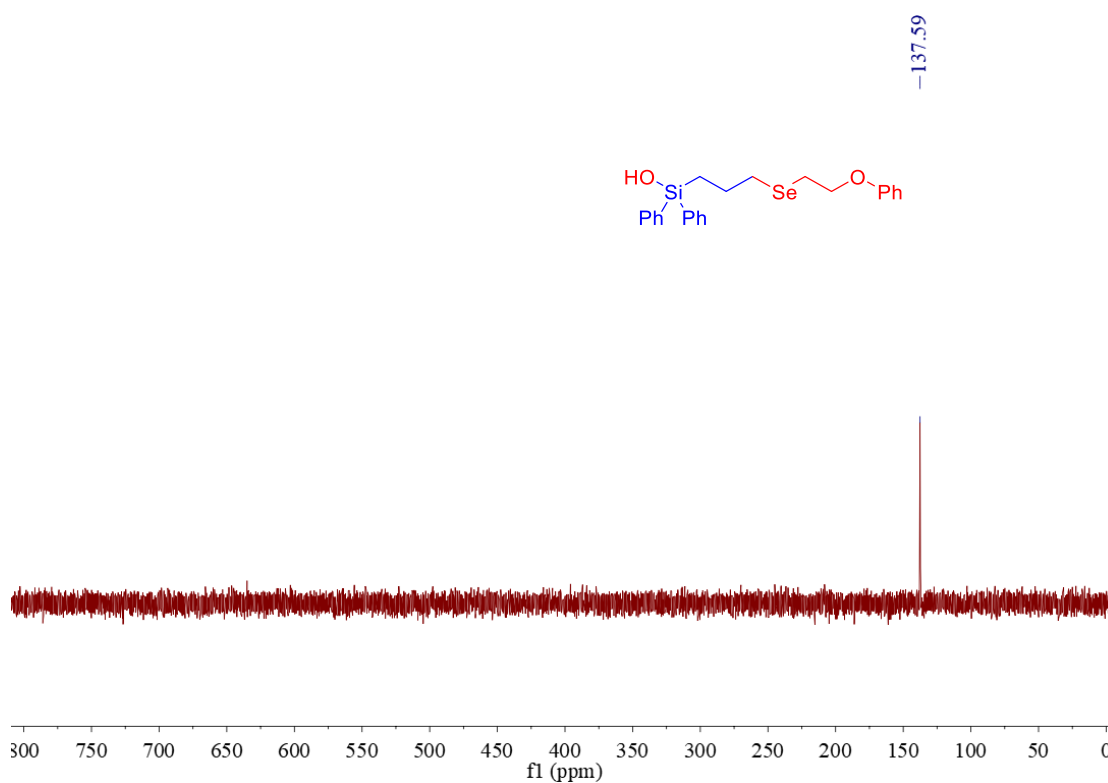

### $^1\text{H}$ NMR Spectra of **5n** (400 MHz, $\text{CDCl}_3$ )

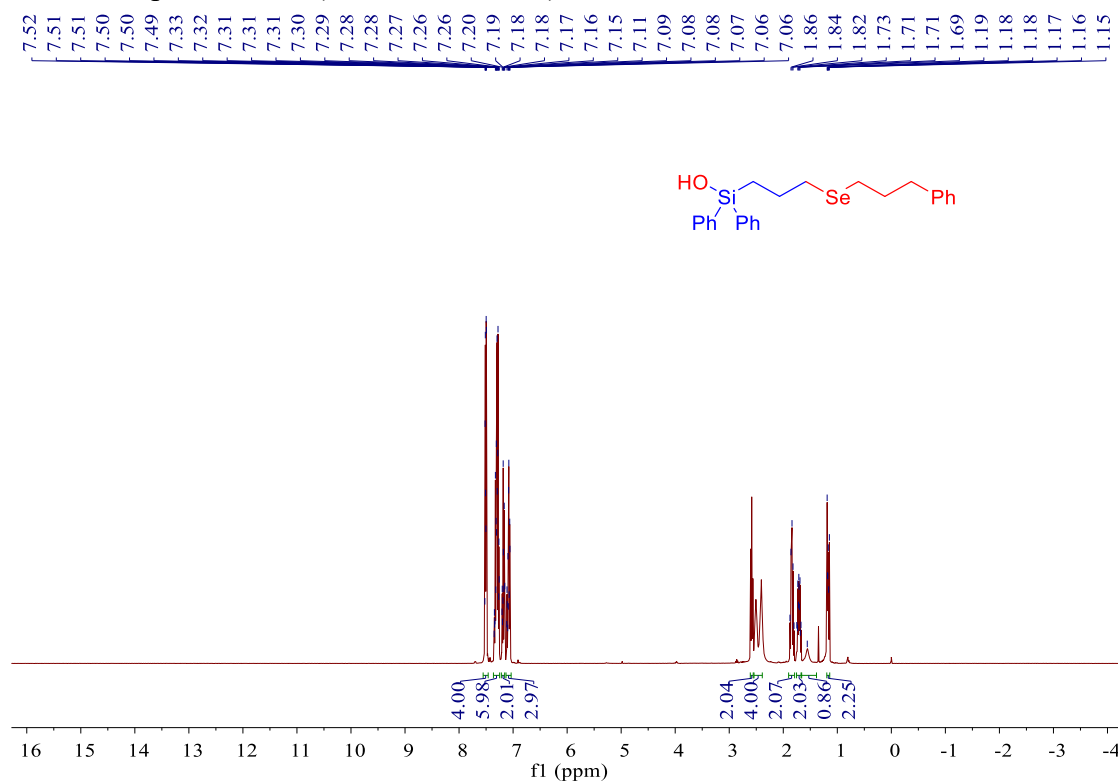

### $^{13}\text{C}$ NMR Spectra of **5n** (100 MHz, $\text{CDCl}_3$ )

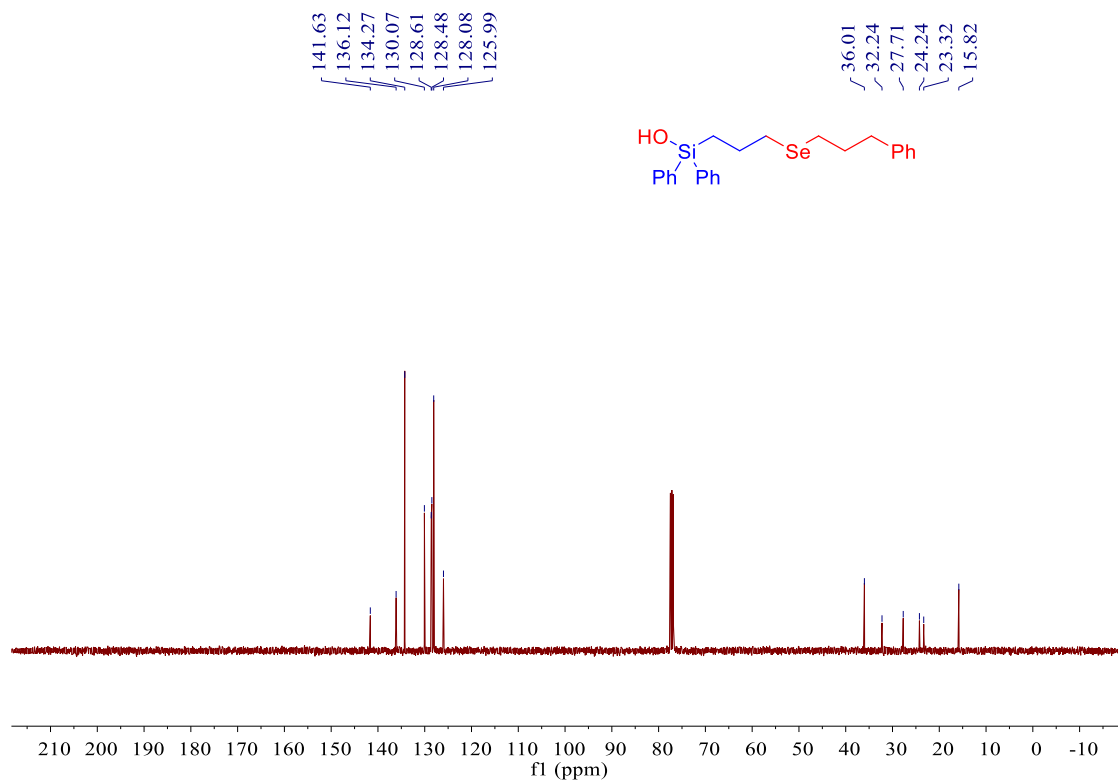



$^{77}\text{Se}$  NMR Spectra of **5n** (100 MHz,  $\text{CDCl}_3$ )

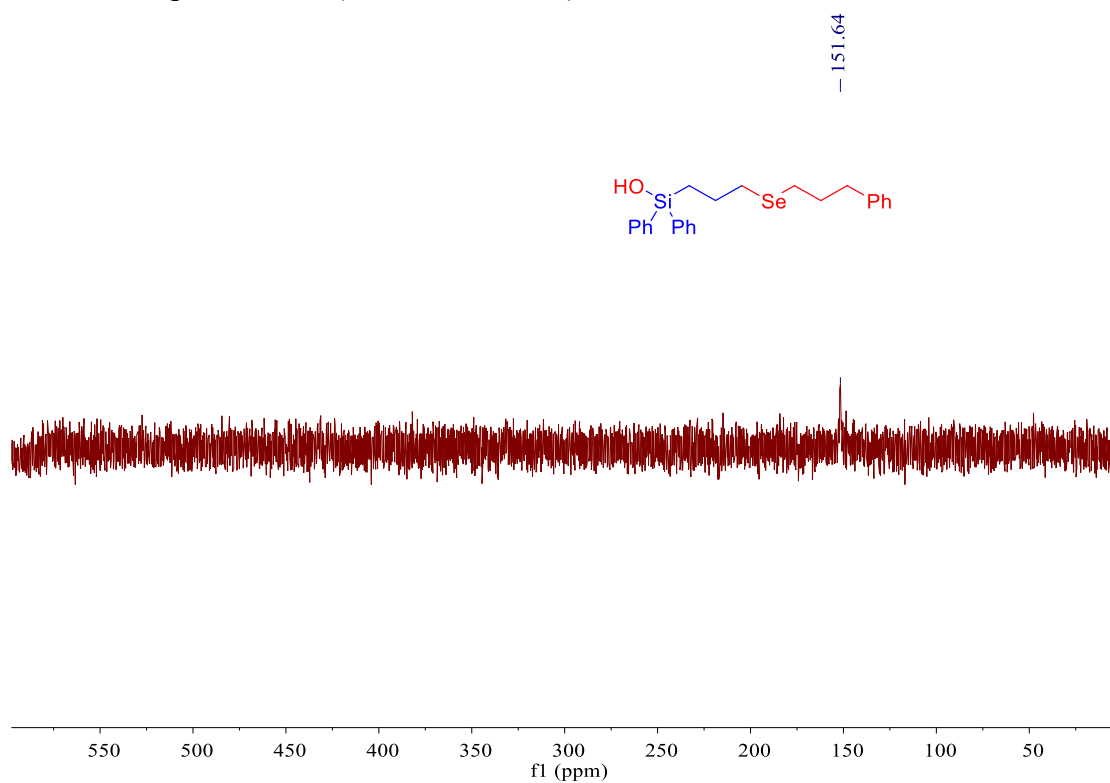

$^1\text{H}$  NMR Spectra of **5o** (400 MHz,  $\text{CDCl}_3$ )

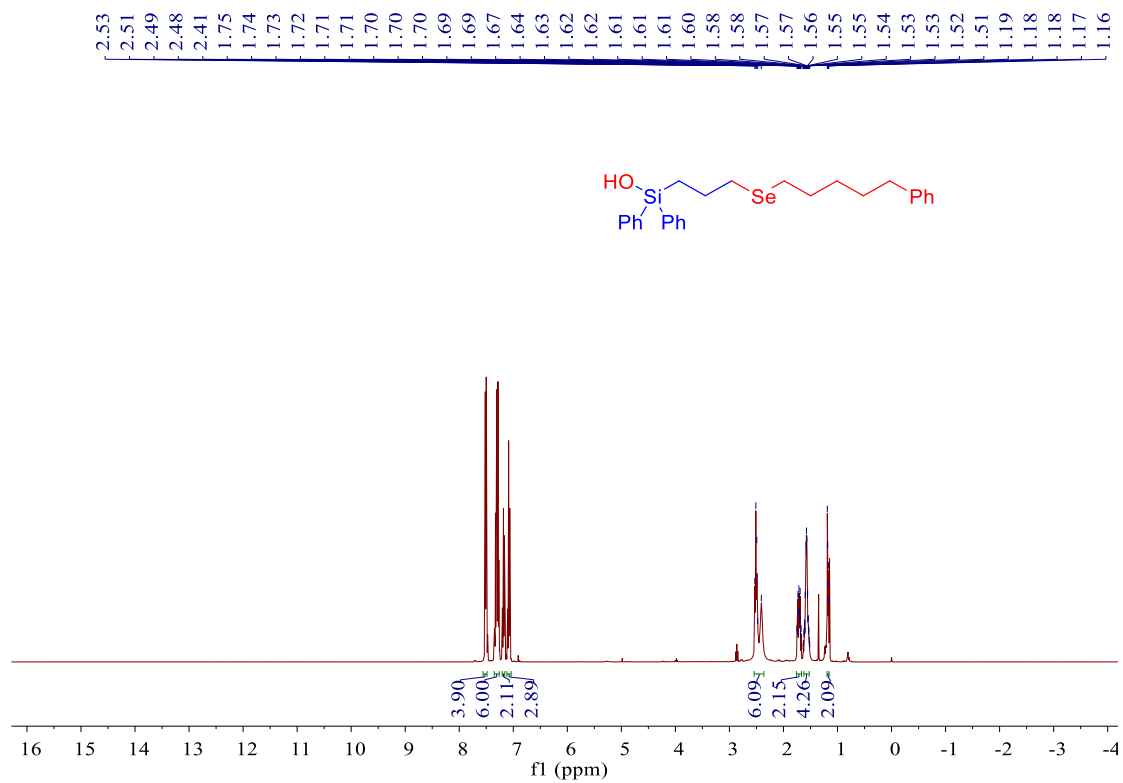

<sup>13</sup>C NMR Spectra of **5o** (100 MHz, CDCl<sub>3</sub>)

142.38  
136.14  
134.28  
130.07  
128.52  
128.42  
128.08  
125.86

35.51  
31.72  
30.29  
27.71  
24.24  
23.74  
15.83

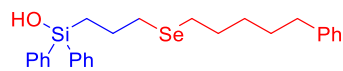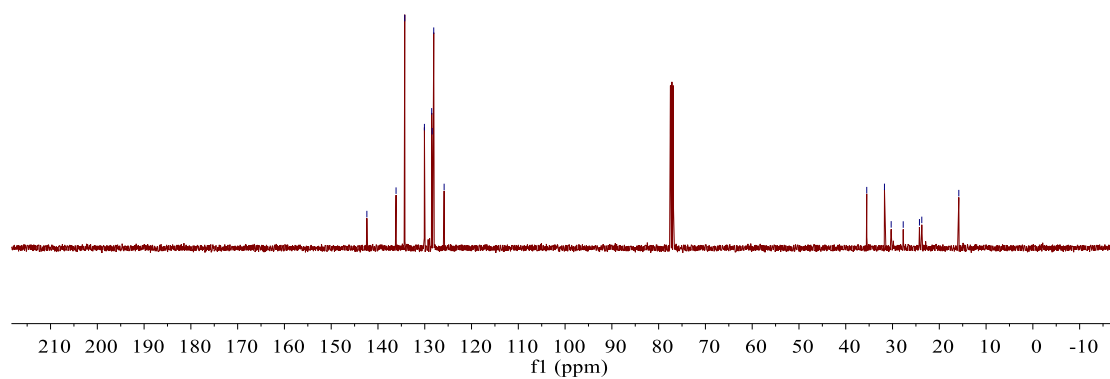

<sup>77</sup>Se NMR Spectra of **5o** (100 MHz, CDCl<sub>3</sub>)

153.32

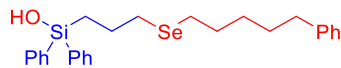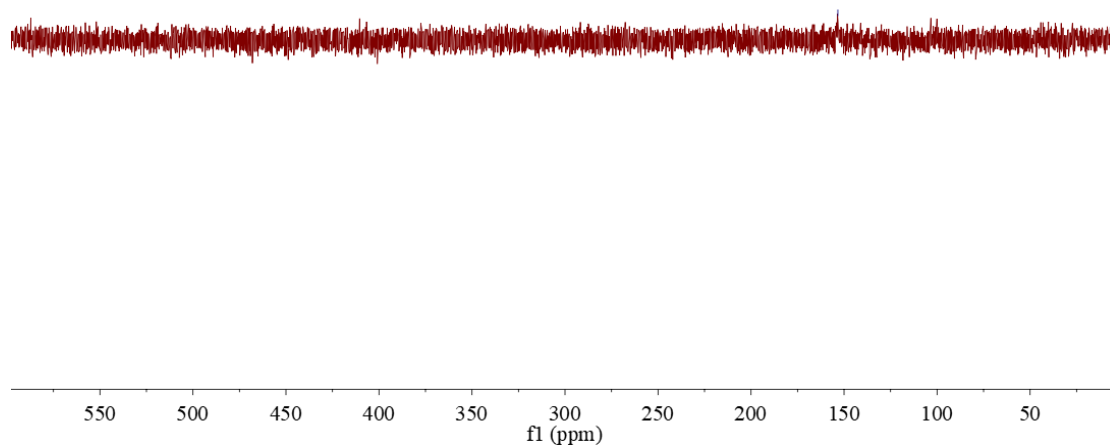

### $^1\text{H}$ NMR Spectra of **5p** (400 MHz, $\text{CDCl}_3$ )

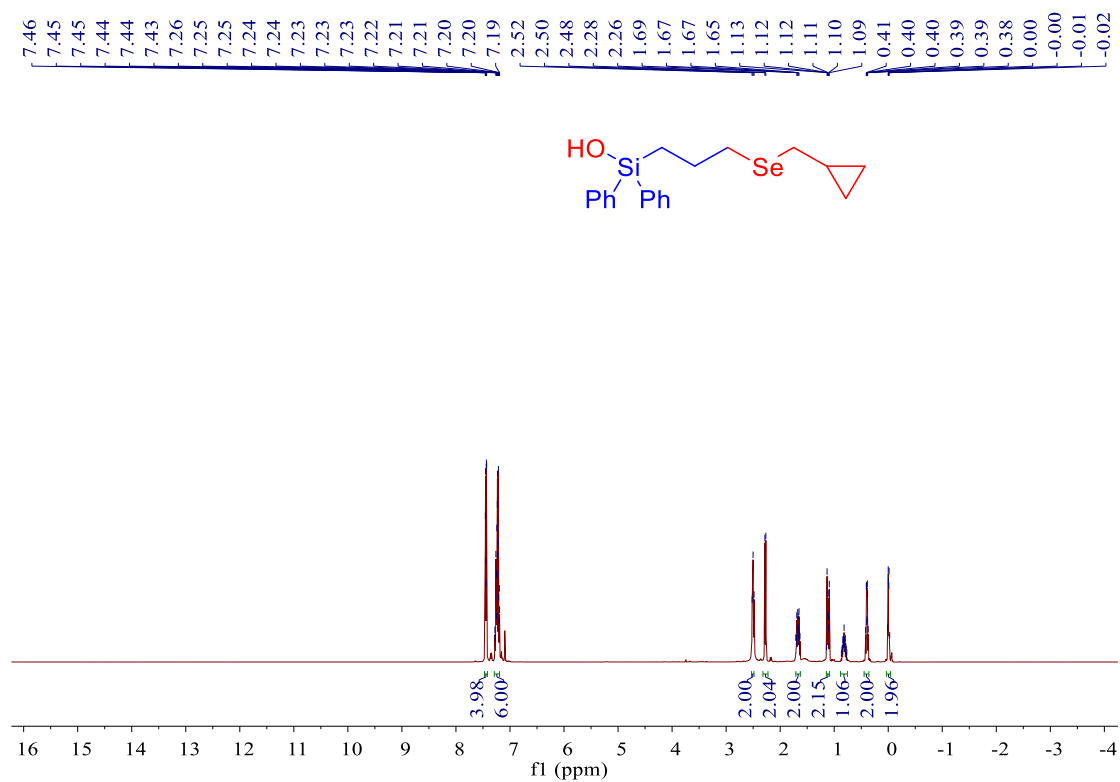

### $^{13}\text{C}$ NMR Spectra of **5p** (100 MHz, $\text{CDCl}_3$ )

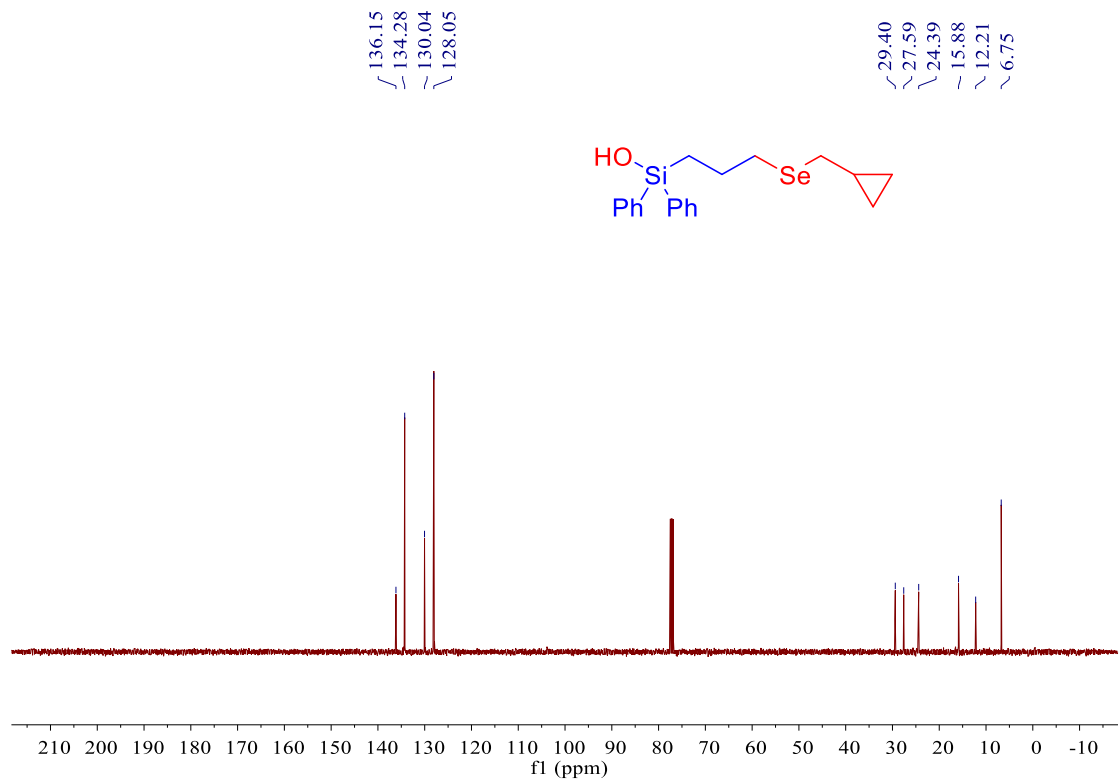

<sup>77</sup>Se NMR Spectra of **5p** (100 MHz, CDCl<sub>3</sub>)

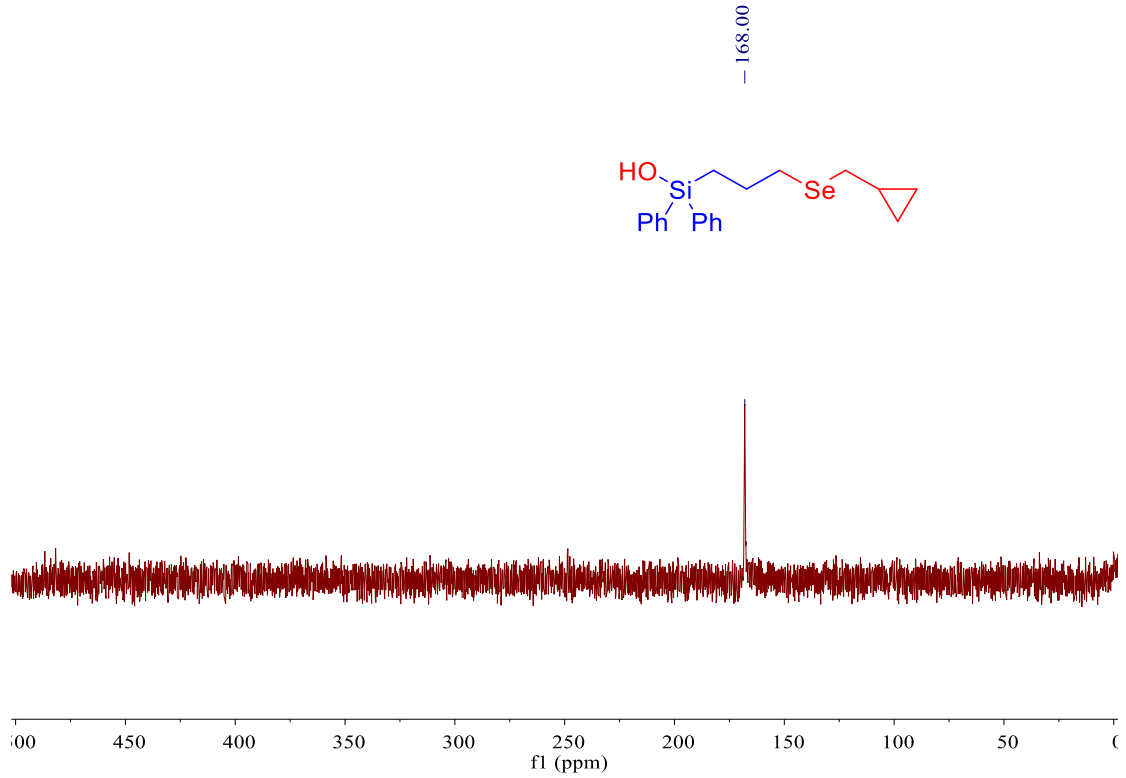

<sup>1</sup>H NMR Spectra of **5q** (400 MHz, CDCl<sub>3</sub>)

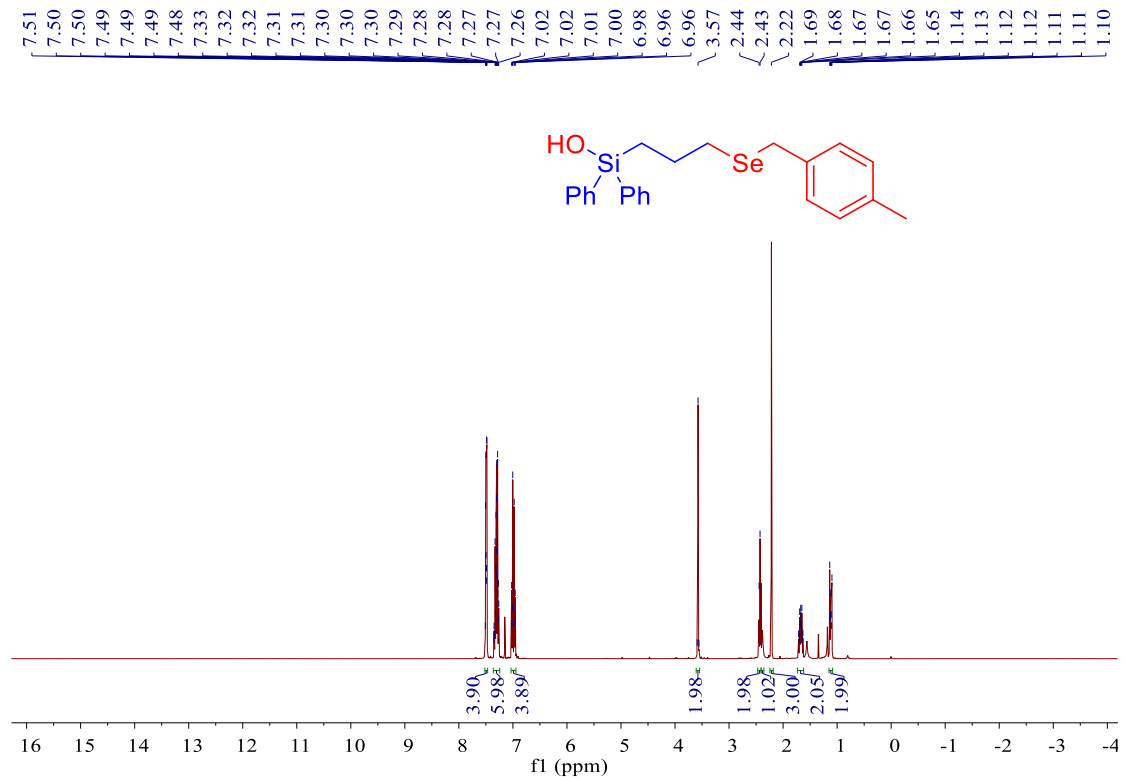

<sup>13</sup>C NMR Spectra of **5q** (100 MHz, CDCl<sub>3</sub>)

136.46  
136.31  
136.12  
134.27  
130.06  
129.25  
128.80  
128.07

27.69  
26.68  
23.90  
21.20  
15.81

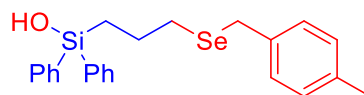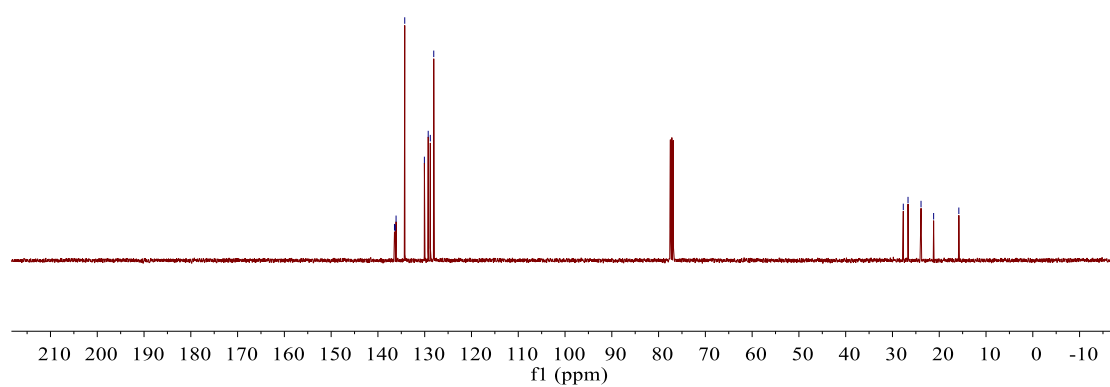

<sup>77</sup>Se NMR Spectra of **5q** (100 MHz, CDCl<sub>3</sub>)

-245.75

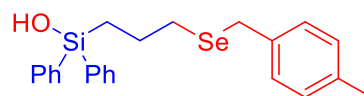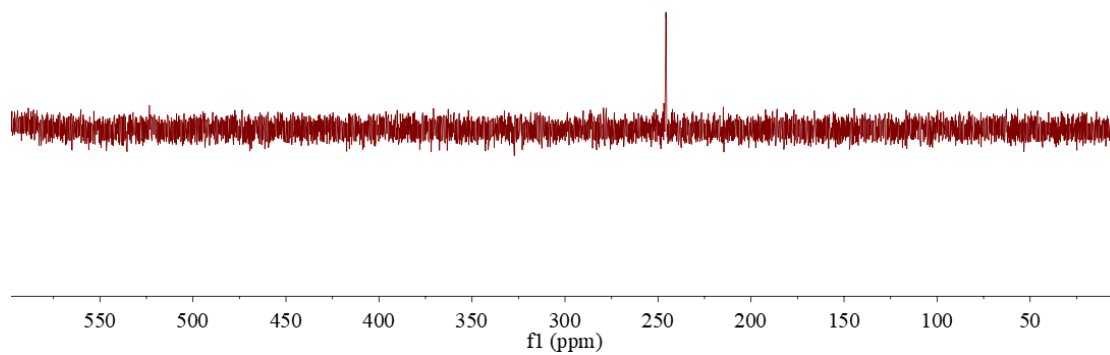

<sup>29</sup>Si NMR Spectra of **5q** (79 MHz, CDCl<sub>3</sub>)

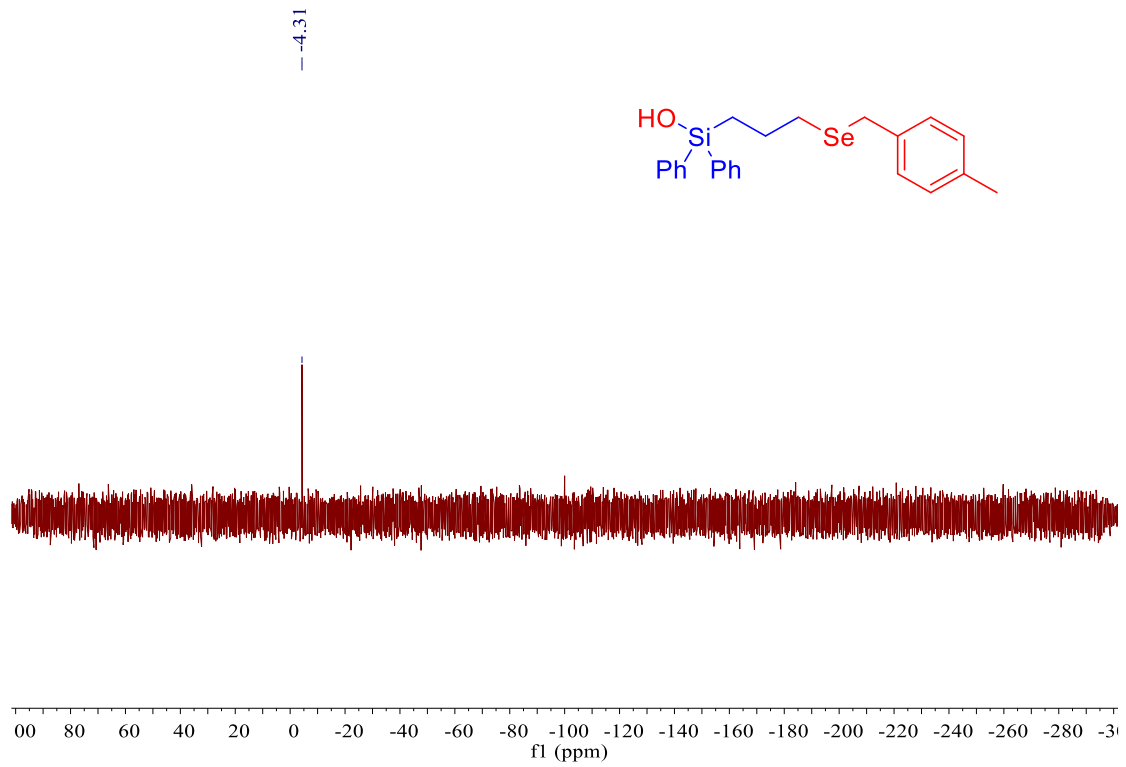

<sup>1</sup>H NMR Spectra of **5r** (400 MHz, CDCl<sub>3</sub>)

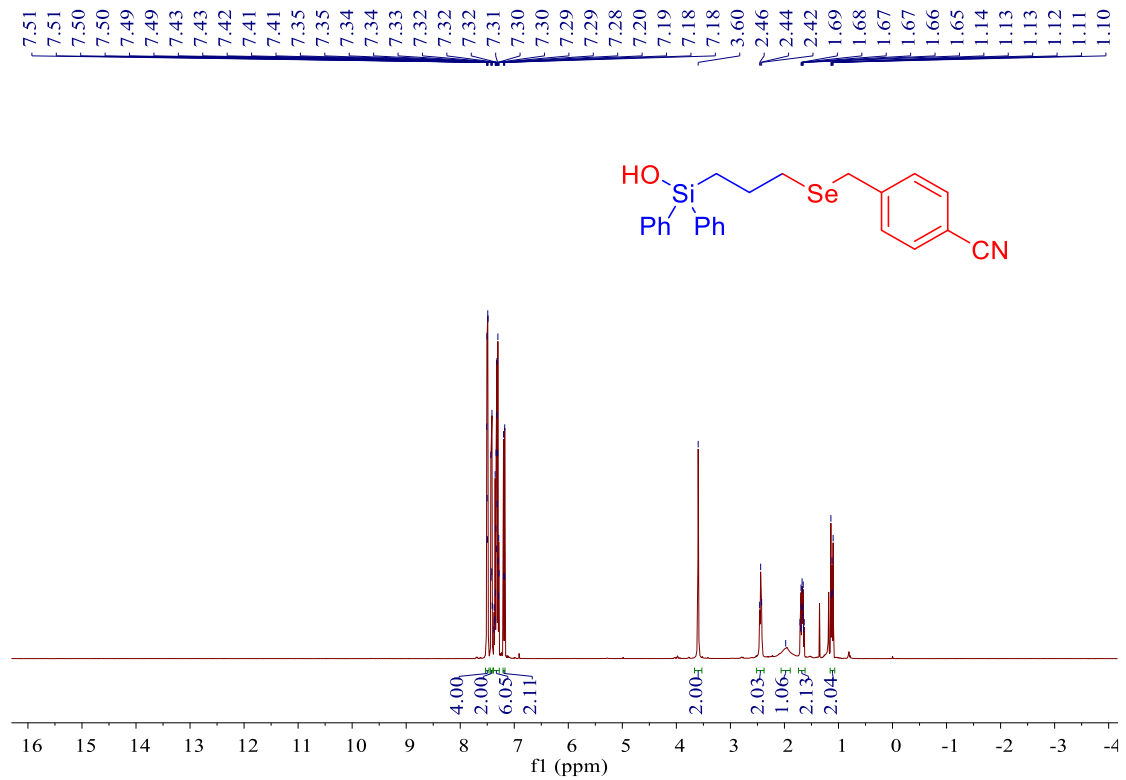

<sup>13</sup>C NMR Spectra of **5r** (100 MHz, CDCl<sub>3</sub>)

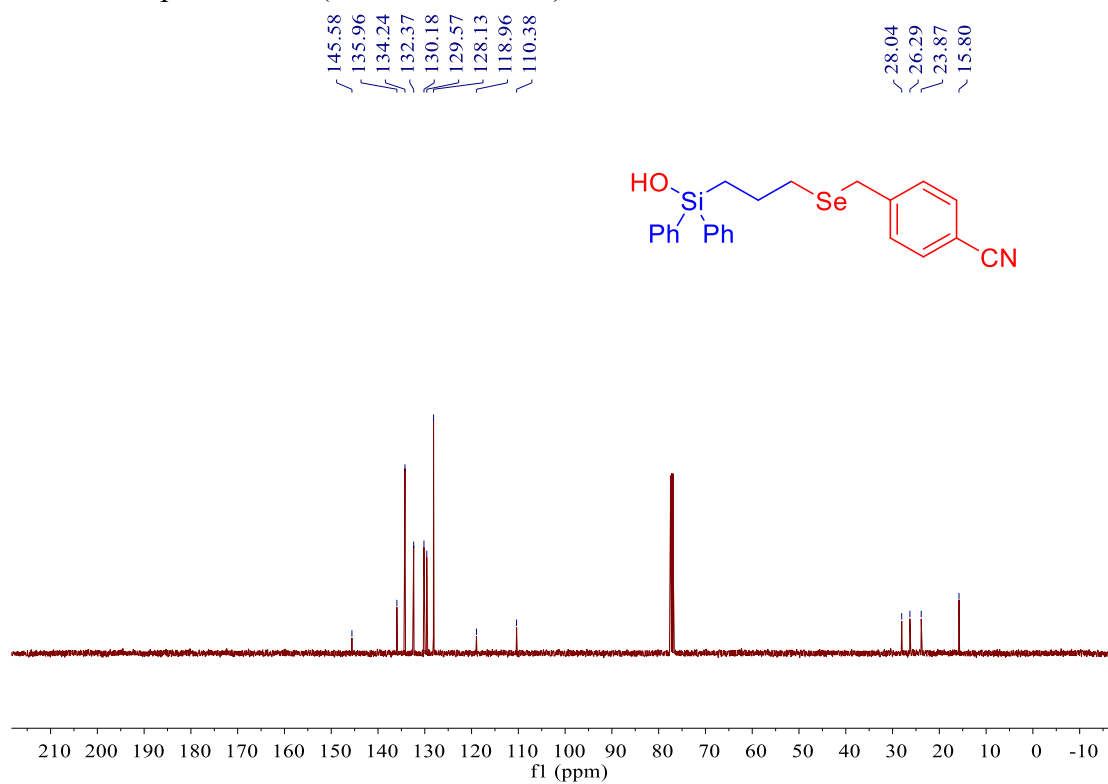

<sup>77</sup>Se NMR Spectra of **5r** (100 MHz, CDCl<sub>3</sub>)

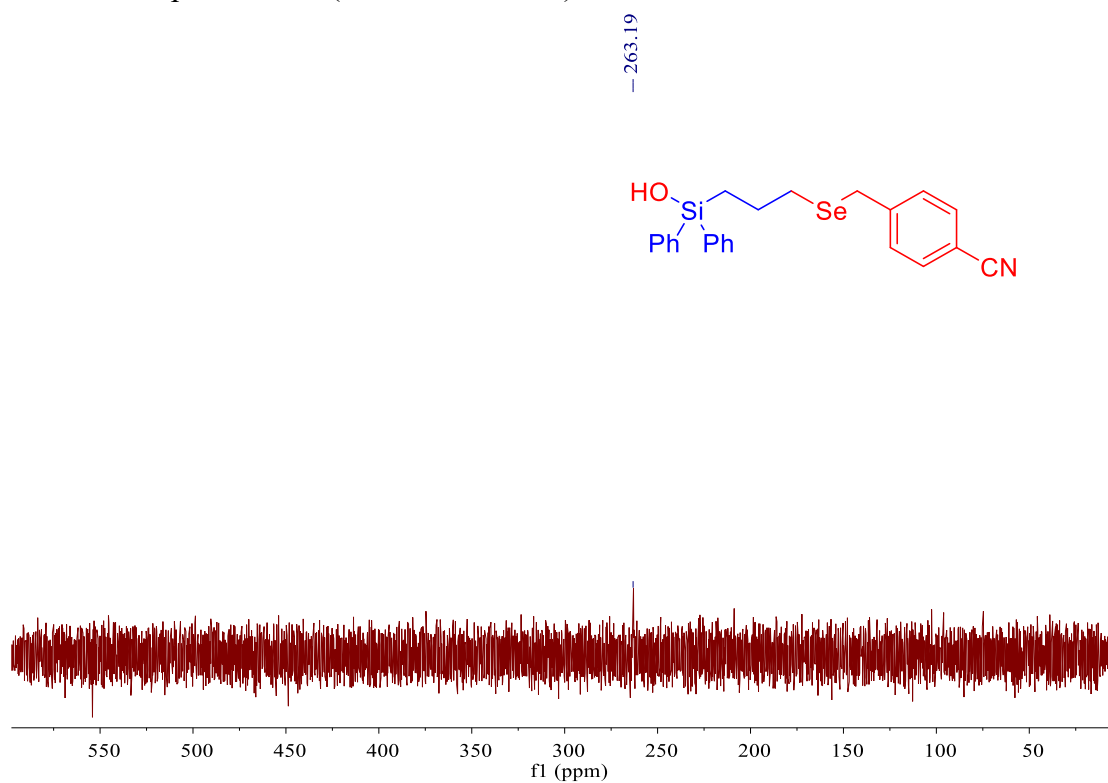

<sup>1</sup>H NMR Spectra of **6a** (400 MHz, CDCl<sub>3</sub>)

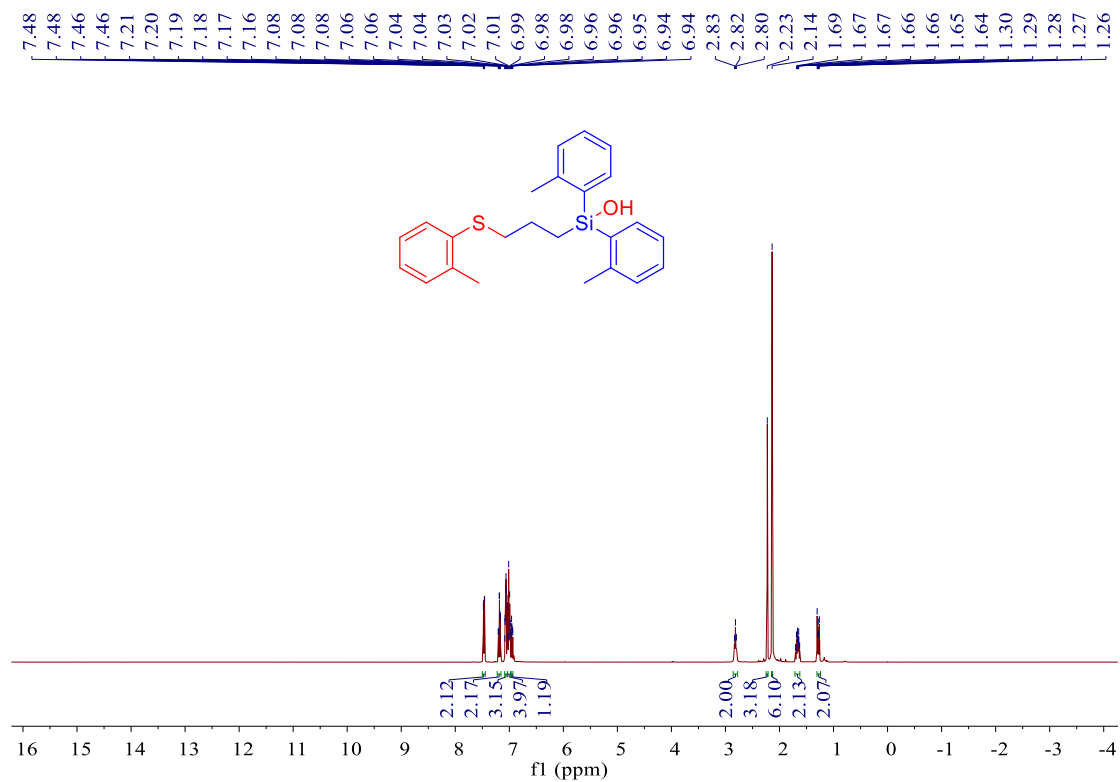

<sup>13</sup>C NMR Spectra of **6a** (100 MHz, CDCl<sub>3</sub>)

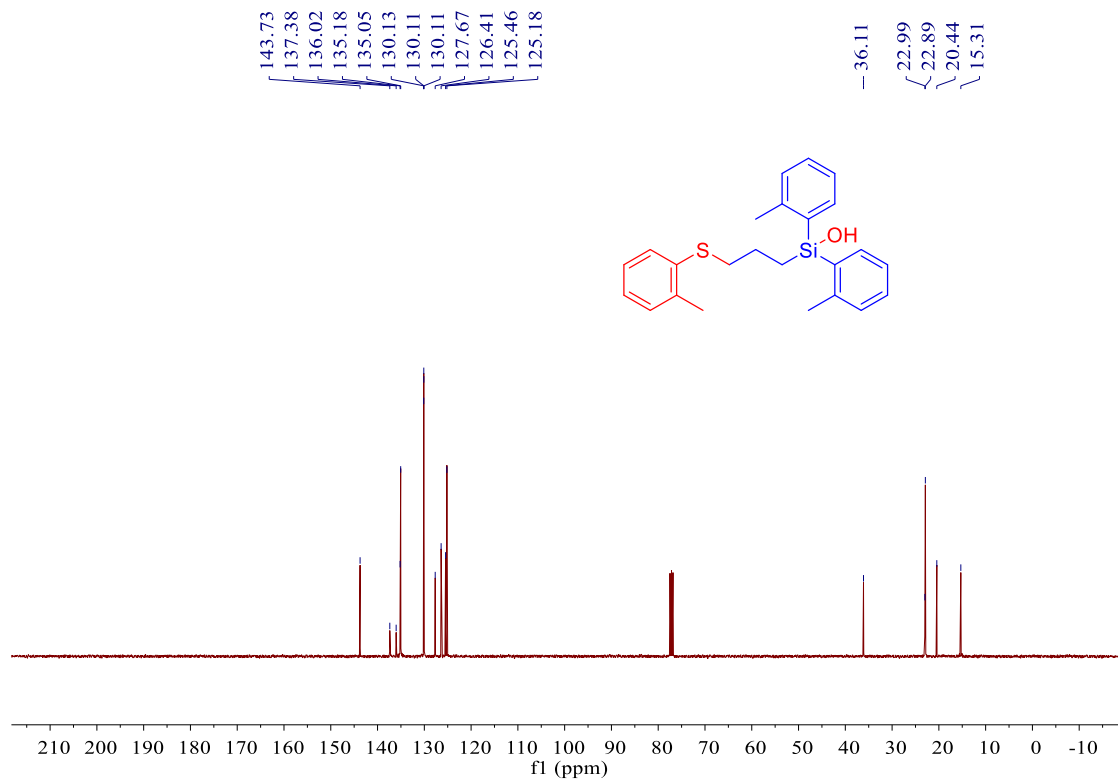



<sup>1</sup>H NMR Spectra of **6b** (400 MHz, CDCl<sub>3</sub>)

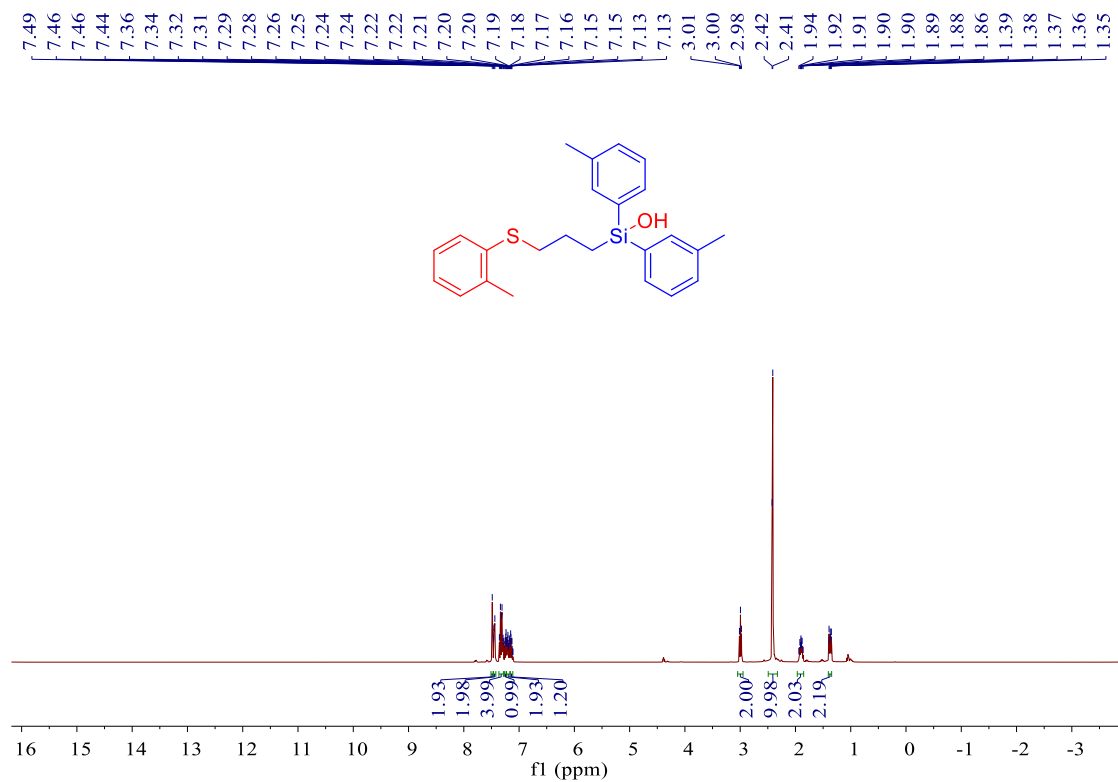

<sup>13</sup>C NMR Spectra of **6p** (100 MHz, CDCl<sub>3</sub>)

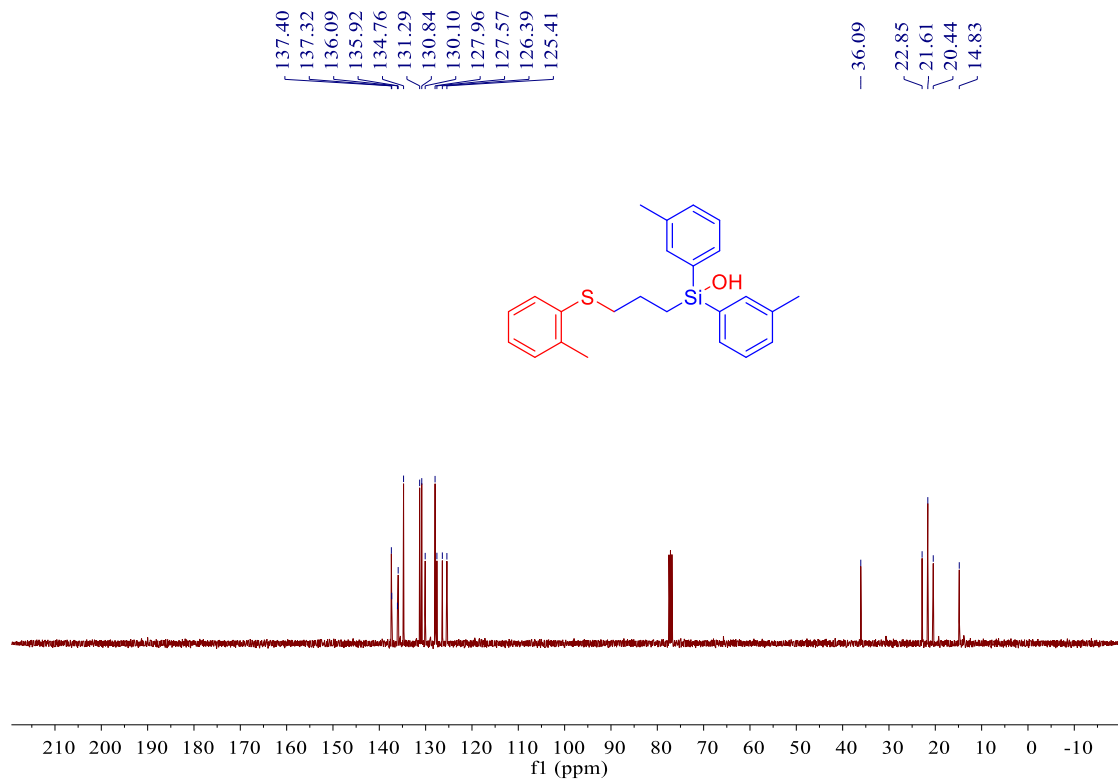

<sup>1</sup>H NMR Spectra of **6c** (400 MHz, CDCl<sub>3</sub>)

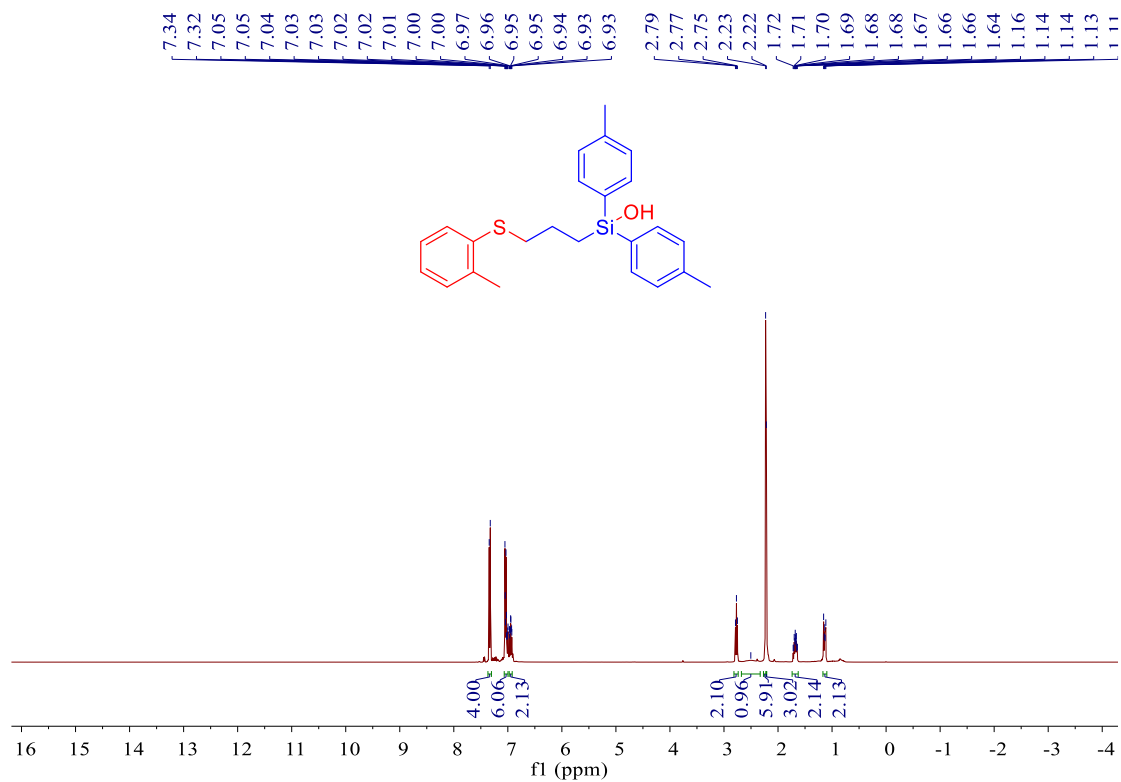

<sup>13</sup>C NMR Spectra of **6c** (100 MHz, CDCl<sub>3</sub>)

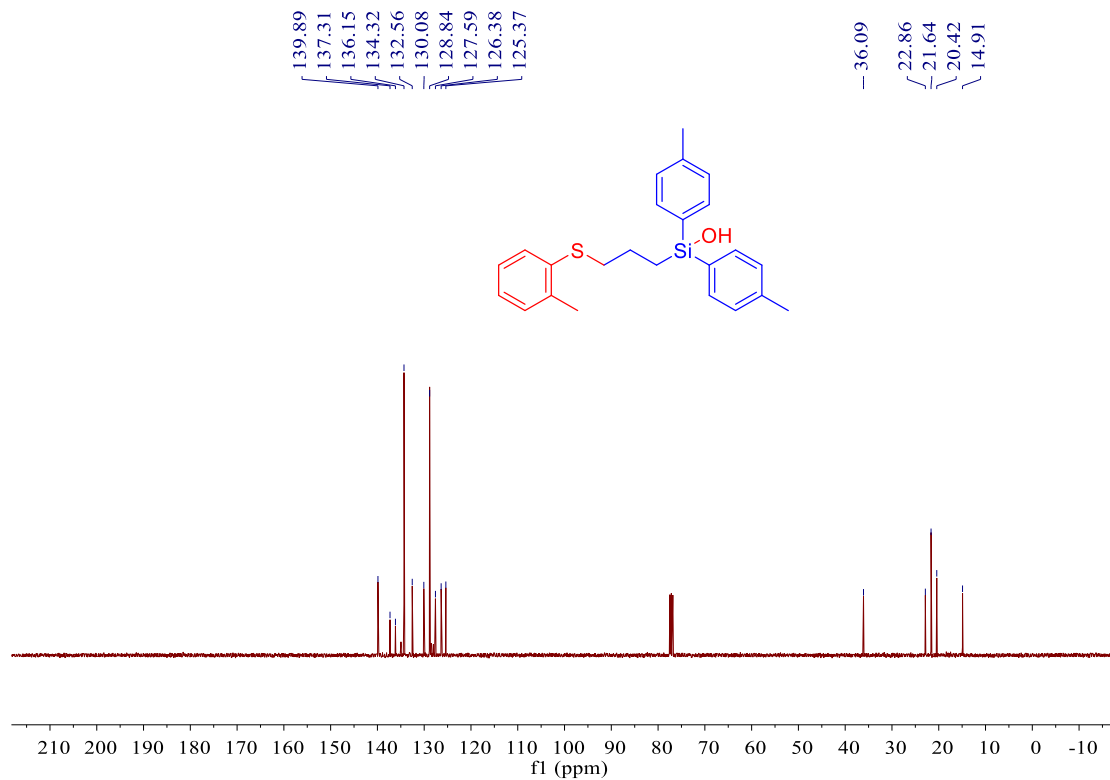

<sup>29</sup>Si NMR Spectra of **6c** (79 MHz, CDCl<sub>3</sub>)

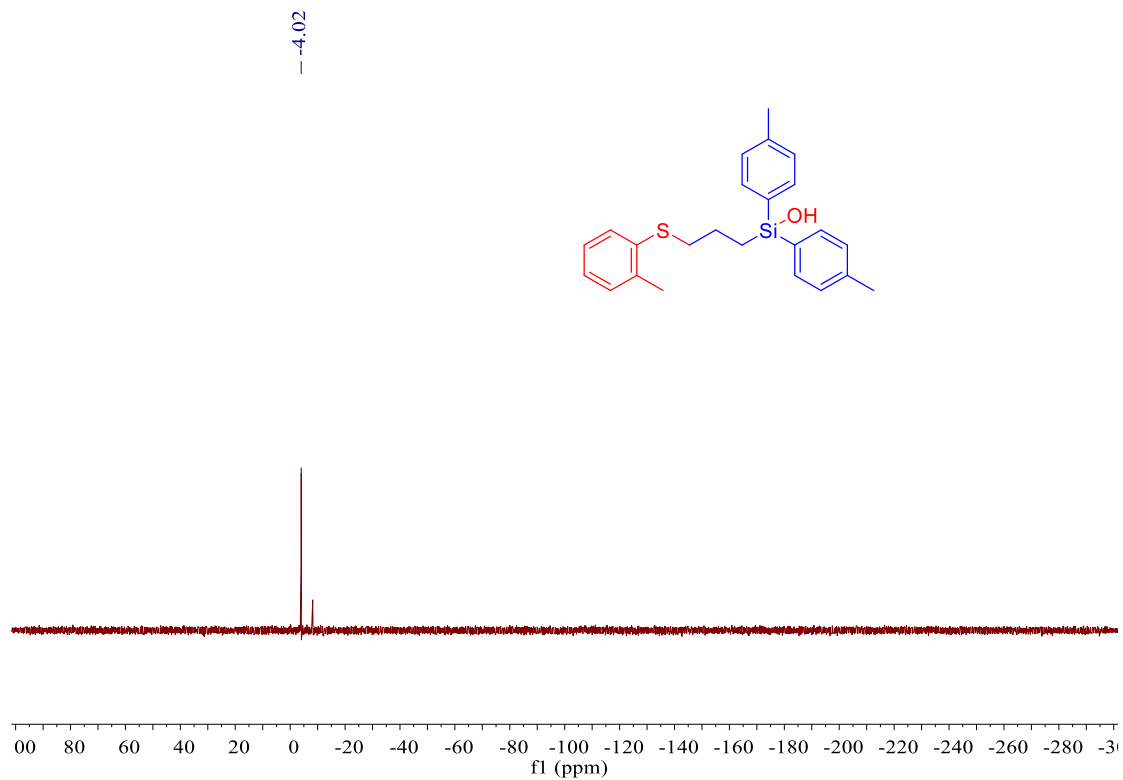

<sup>1</sup>H NMR Spectra of **6d** (400 MHz, CDCl<sub>3</sub>)

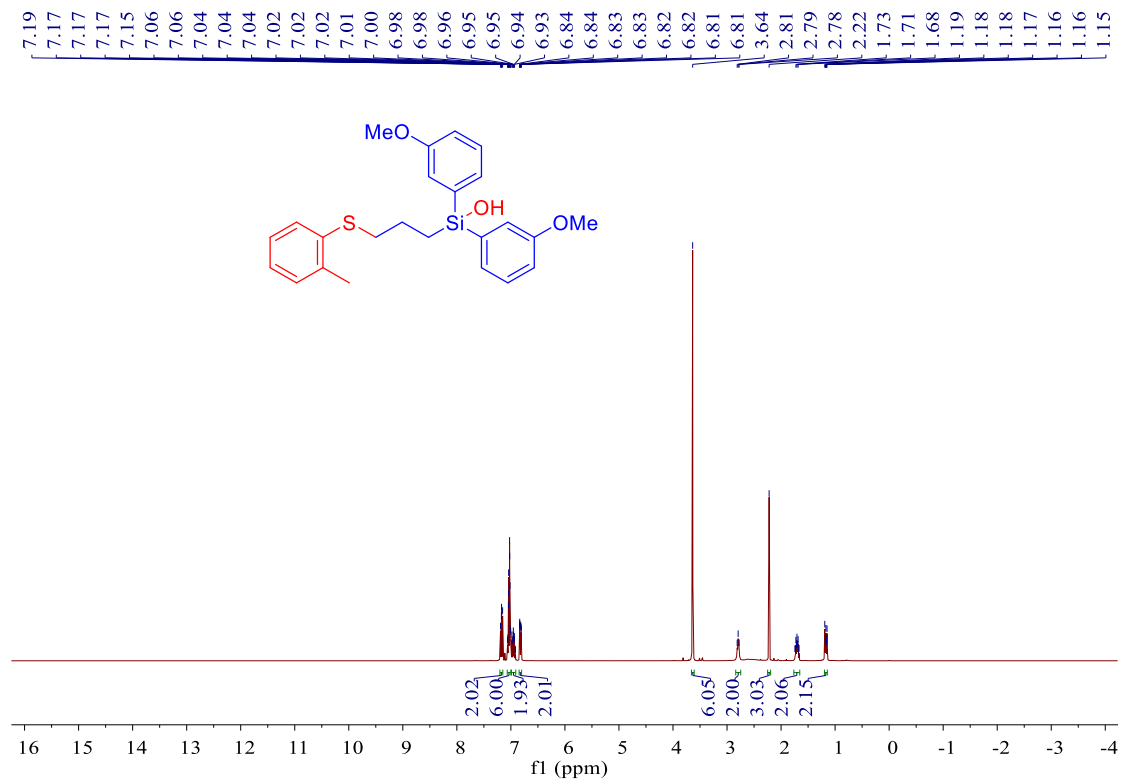

<sup>13</sup>C NMR Spectra of **6d** (100 MHz, CDCl<sub>3</sub>)

159.12  
 137.50  
 137.33  
 136.02  
 130.09  
 129.33  
 127.60  
 126.50  
 126.40  
 125.43  
 119.43  
 115.56  
 -55.18  
 -36.03  
 ~22.83  
 ~20.40  
 ~14.74

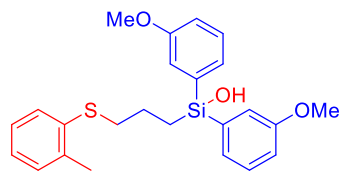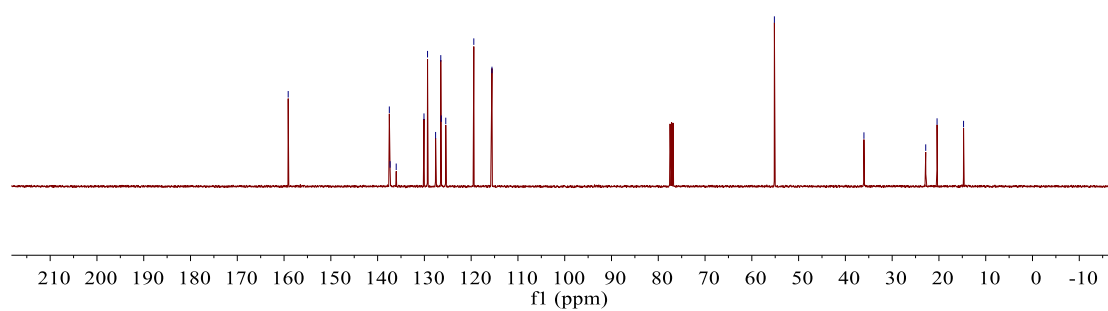

<sup>1</sup>H NMR Spectra of **6e** (400 MHz, CDCl<sub>3</sub>)

7.23  
 7.21  
 7.21  
 7.20  
 7.19  
 7.19  
 7.17  
 7.13  
 7.13  
 7.11  
 7.10  
 7.07  
 7.05  
 7.05  
 7.04  
 7.04  
 7.02  
 7.02  
 7.00  
 7.00  
 6.99  
 6.99  
 6.99  
 6.98  
 6.98  
 6.97  
 6.97  
 6.96  
 6.96  
 6.96  
 6.95  
 6.95  
 2.81  
 2.80  
 2.78  
 2.78  
 2.23  
 2.23  
 1.69  
 1.67  
 1.65  
 1.19  
 1.18  
 1.17  
 1.16  
 1.15

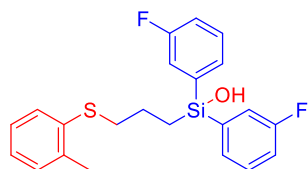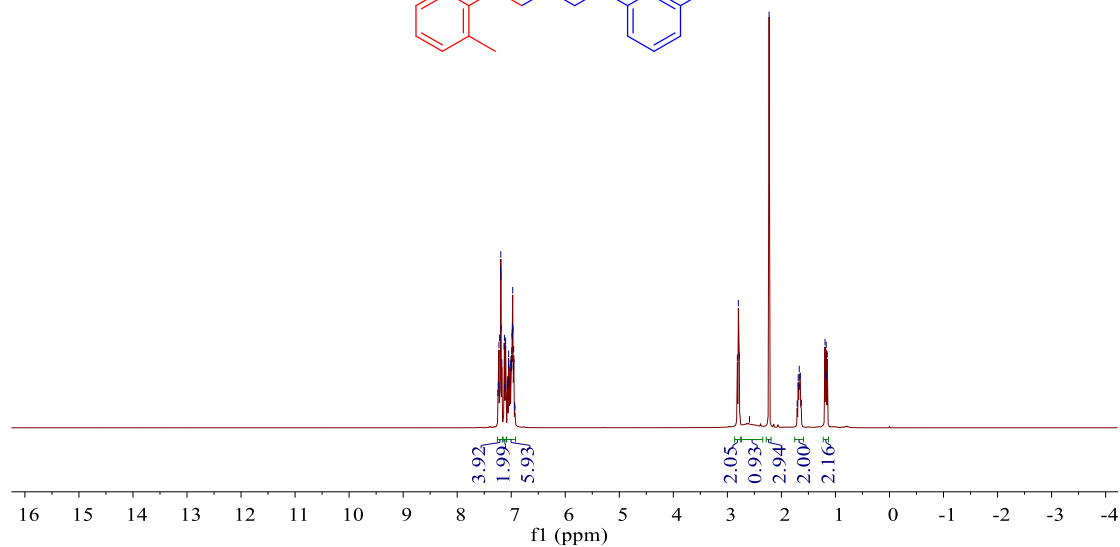

<sup>13</sup>C NMR Spectra of **6e** (100 MHz, CDCl<sub>3</sub>)

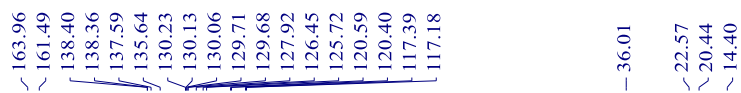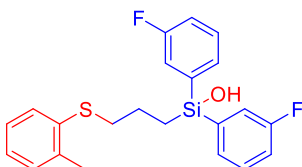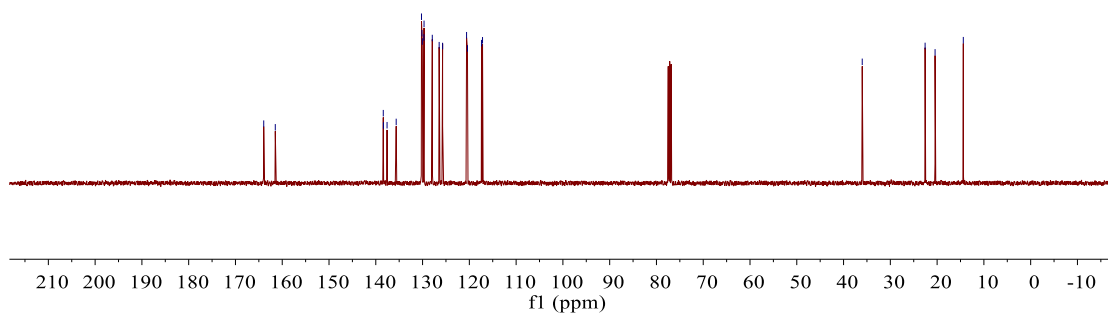

<sup>1</sup>H NMR Spectra of **6f** (400 MHz, CDCl<sub>3</sub>)

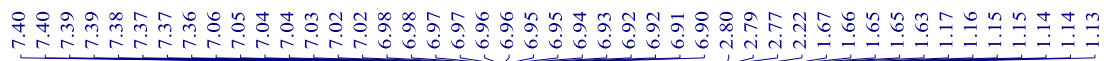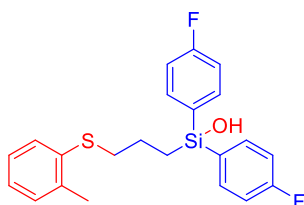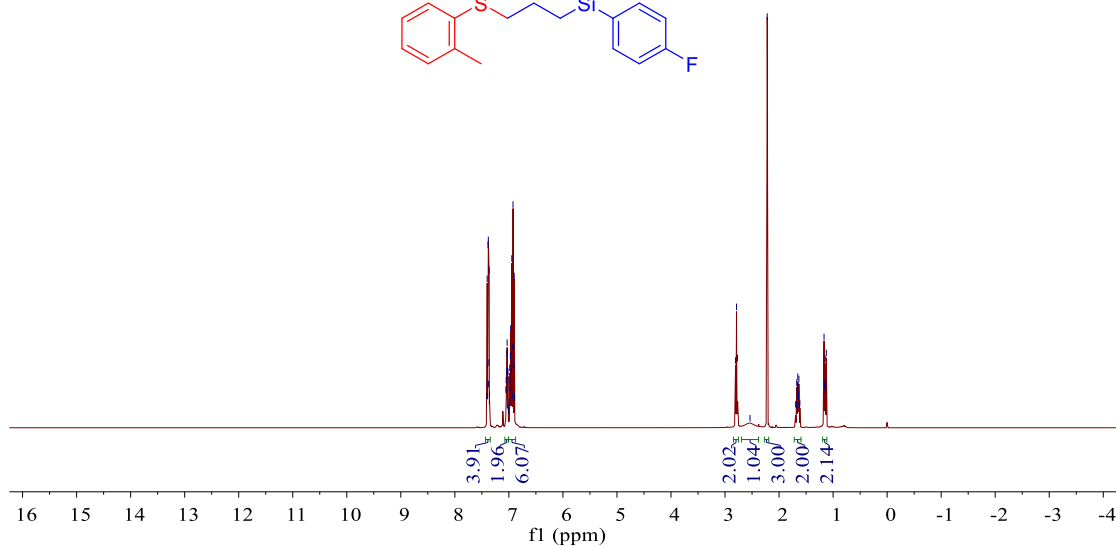

<sup>13</sup>C NMR Spectra of **6f** (100 MHz, CDCl<sub>3</sub>)

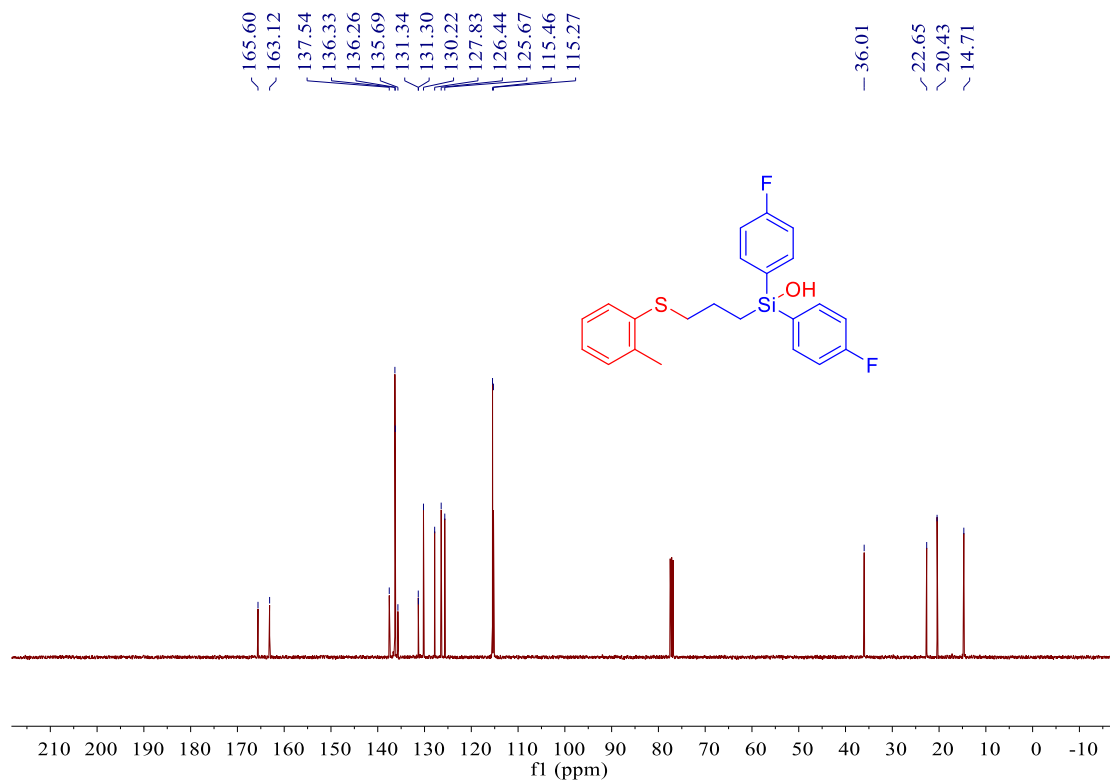

<sup>1</sup>H NMR Spectra of **6g** (400 MHz, CDCl<sub>3</sub>)

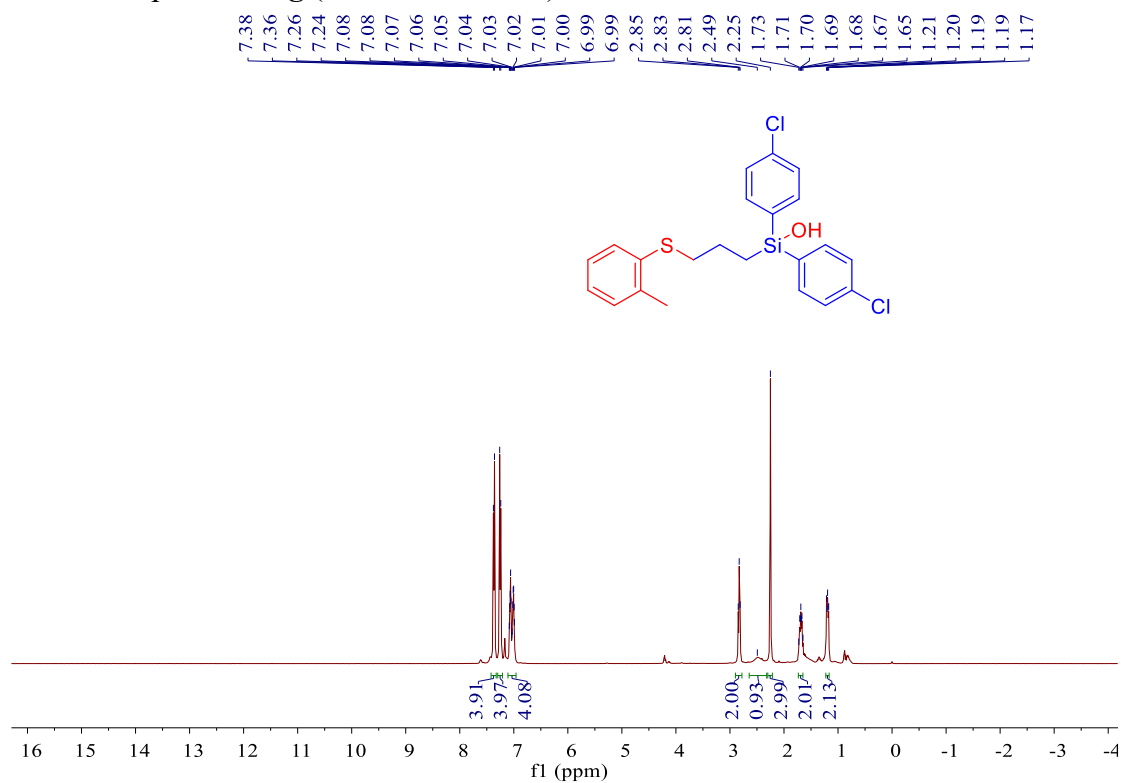

<sup>13</sup>C NMR Spectra of **6g** (100 MHz, CDCl<sub>3</sub>)

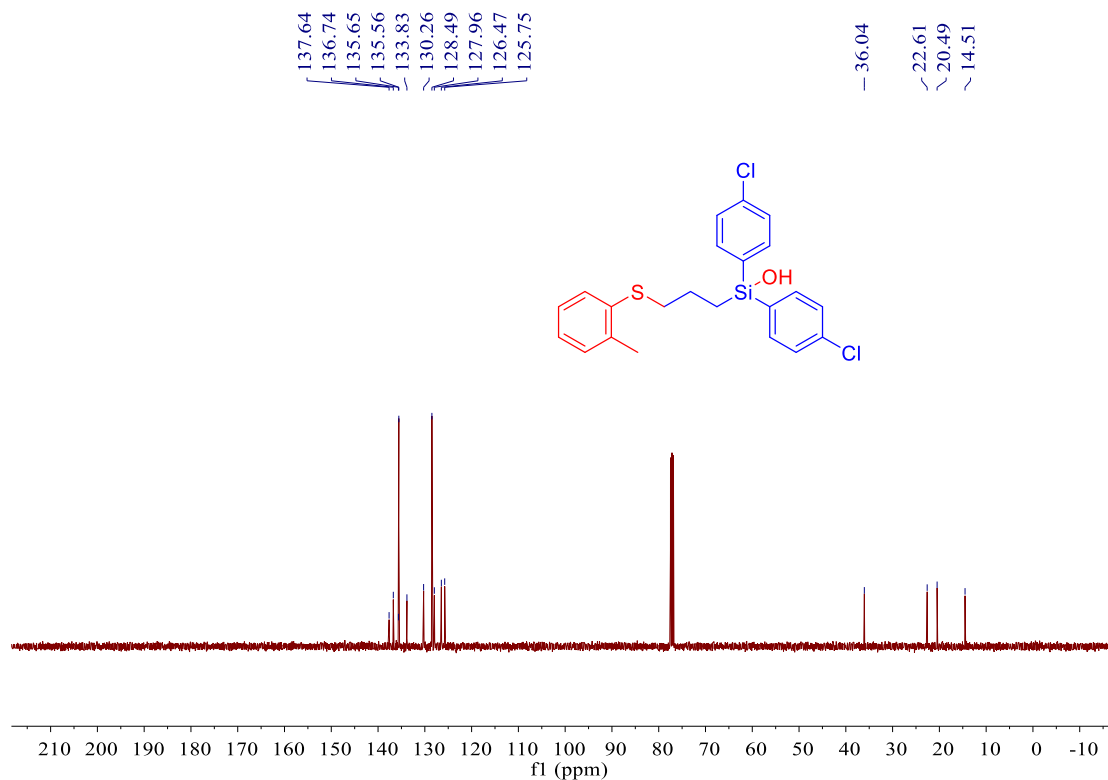

<sup>1</sup>H NMR Spectra of **6h** (400 MHz, CDCl<sub>3</sub>)

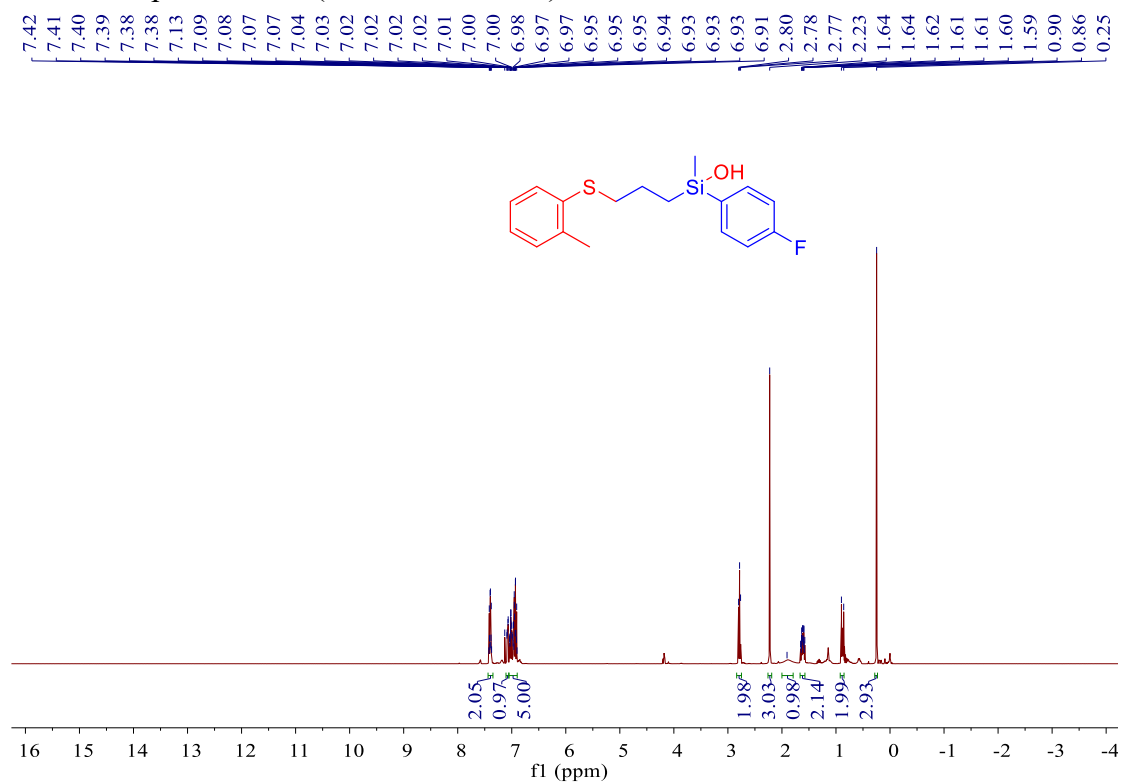

<sup>13</sup>C NMR Spectra of **6h** (100 MHz, CDCl<sub>3</sub>)

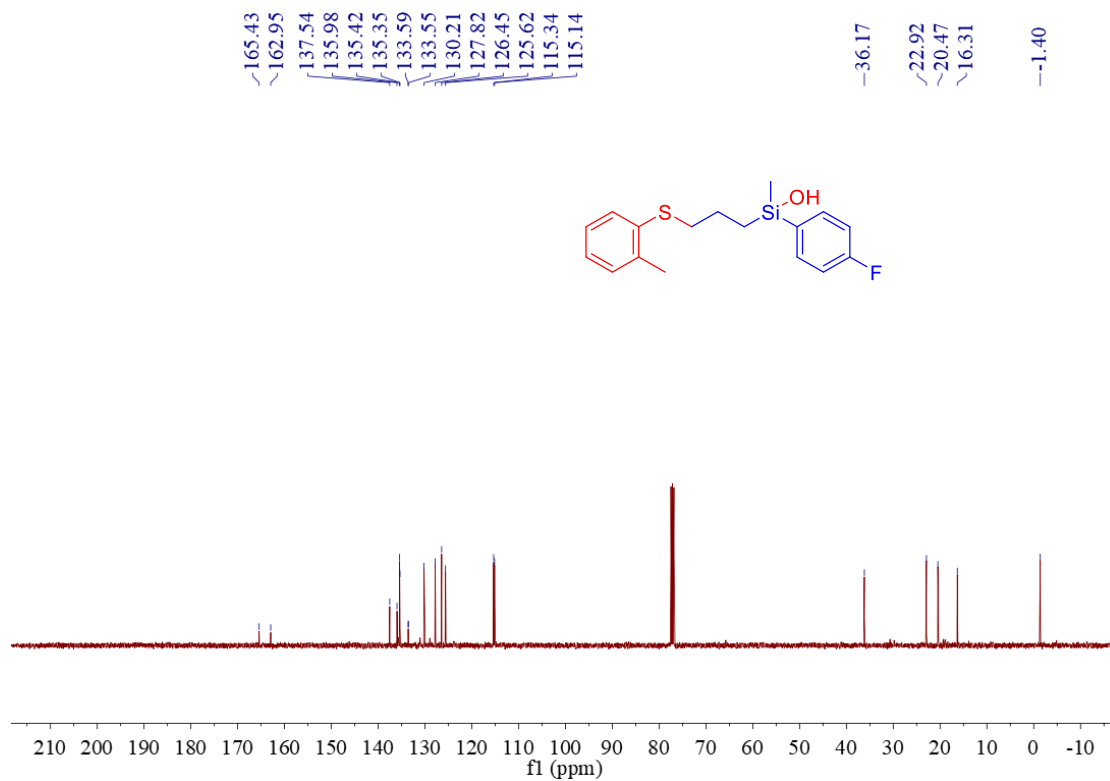

<sup>1</sup>H NMR Spectra of **6i** (400 MHz, CDCl<sub>3</sub>)

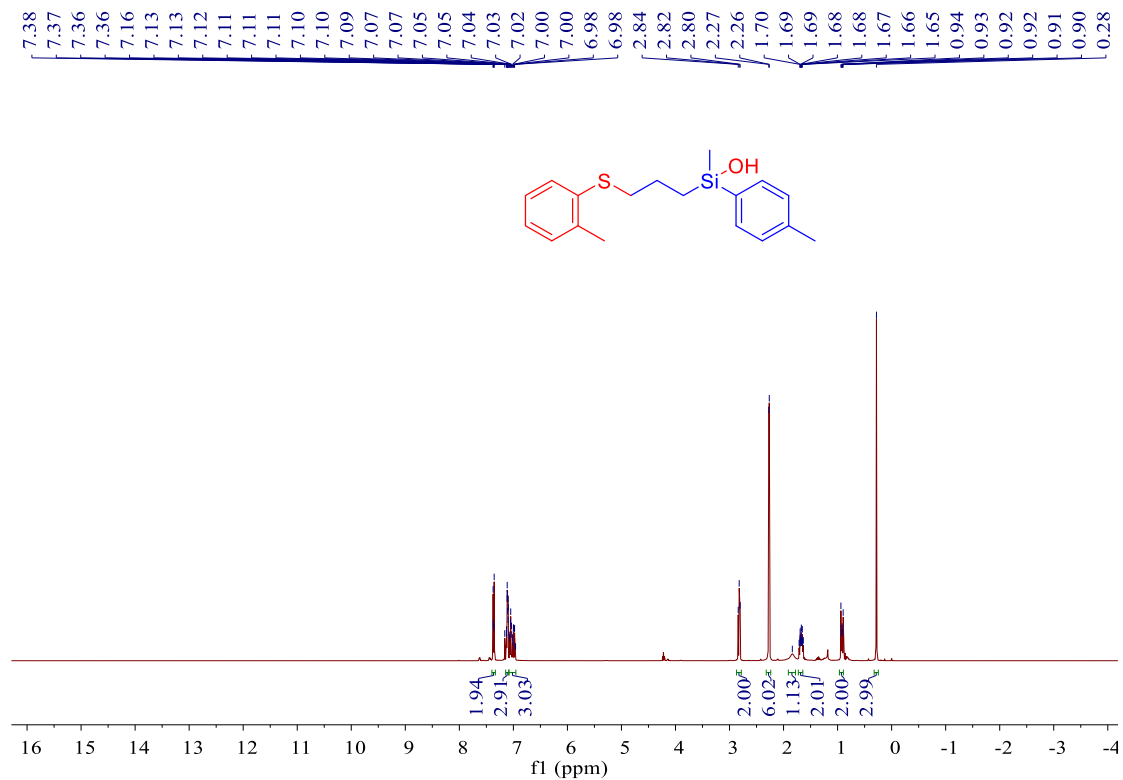



<sup>13</sup>C NMR Spectra of **6i** (100 MHz, CDCl<sub>3</sub>)

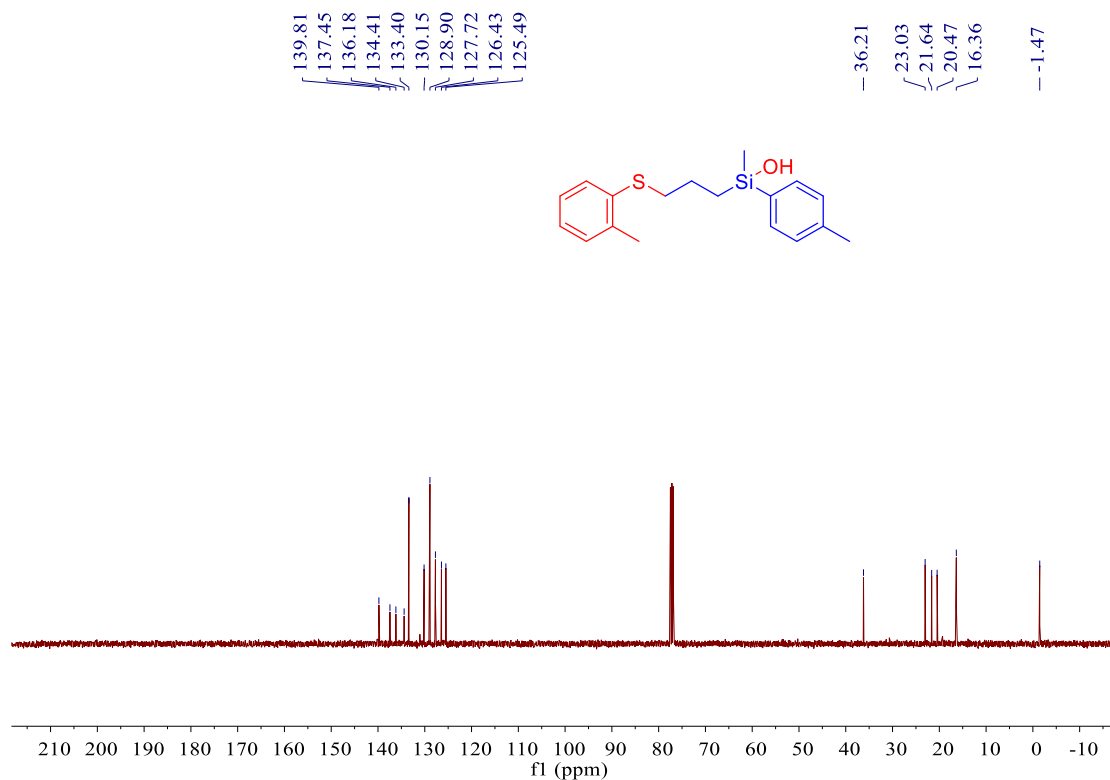

<sup>1</sup>H NMR Spectra of **6j** (400 MHz, CDCl<sub>3</sub>)

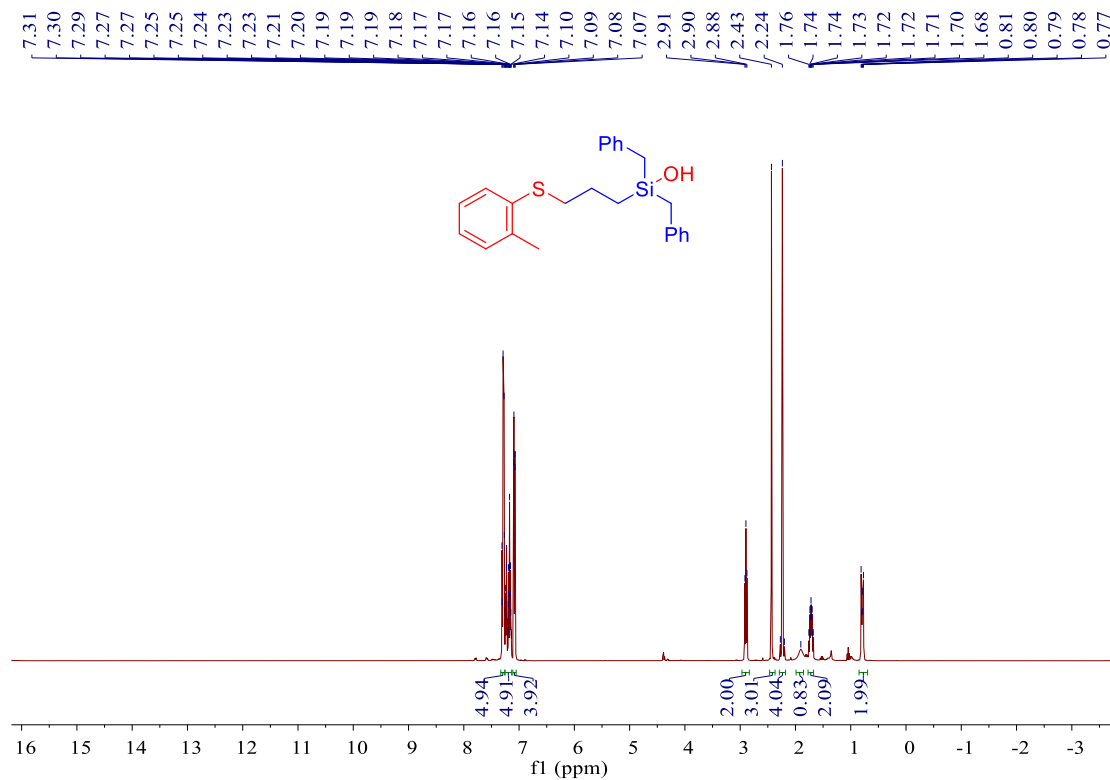

<sup>13</sup>C NMR Spectra of **6j** (100 MHz, CDCl<sub>3</sub>)

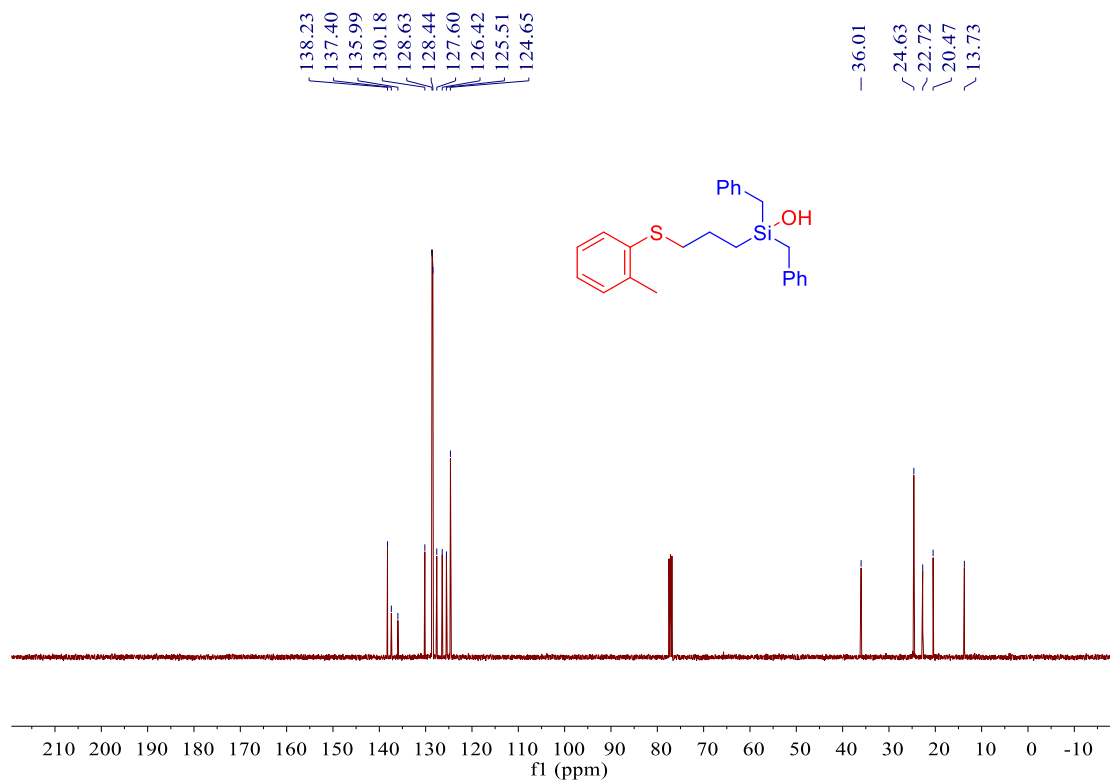

<sup>1</sup>H NMR Spectra of **5s** (400 MHz, CDCl<sub>3</sub>)

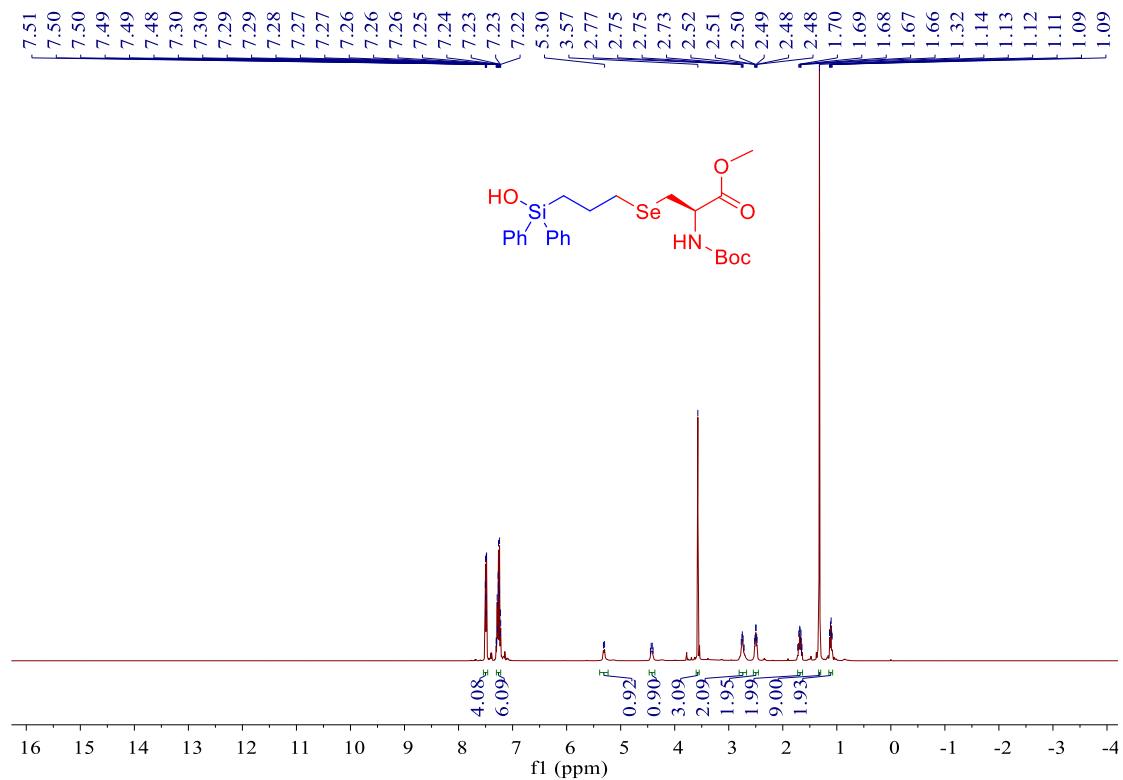

<sup>13</sup>C NMR Spectra of **5s** (100 MHz, CDCl<sub>3</sub>)

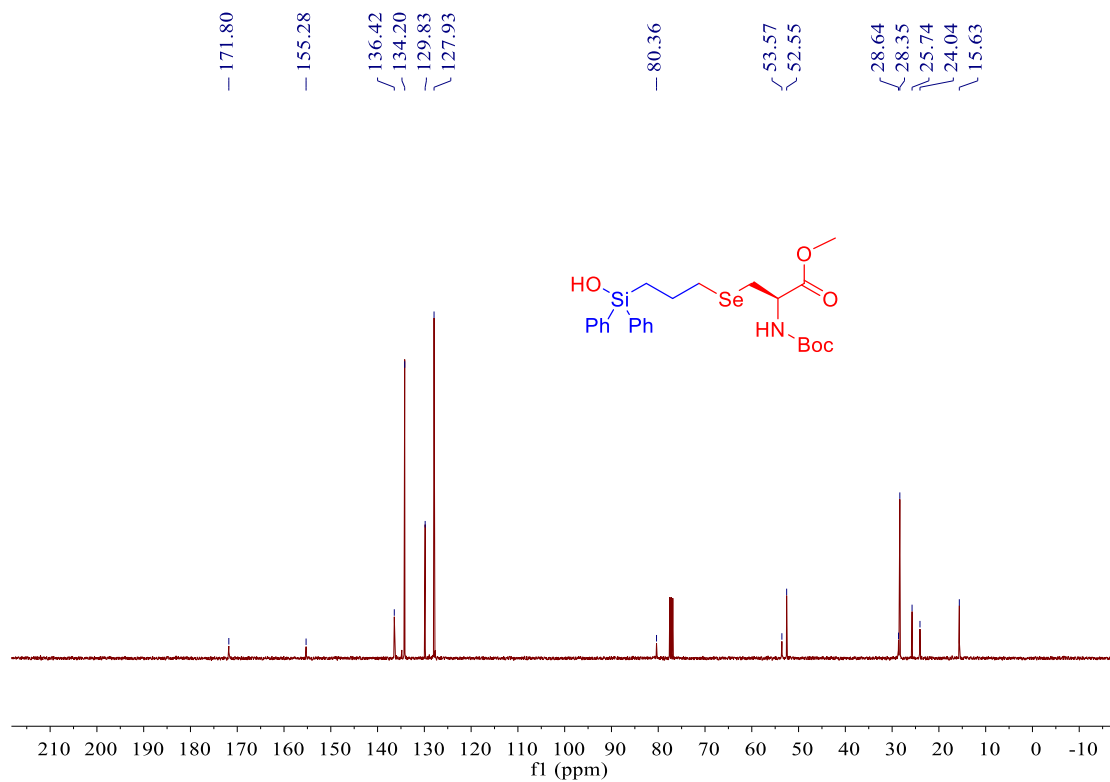

<sup>1</sup>H NMR Spectra of **5t** (400 MHz, CDCl<sub>3</sub>)

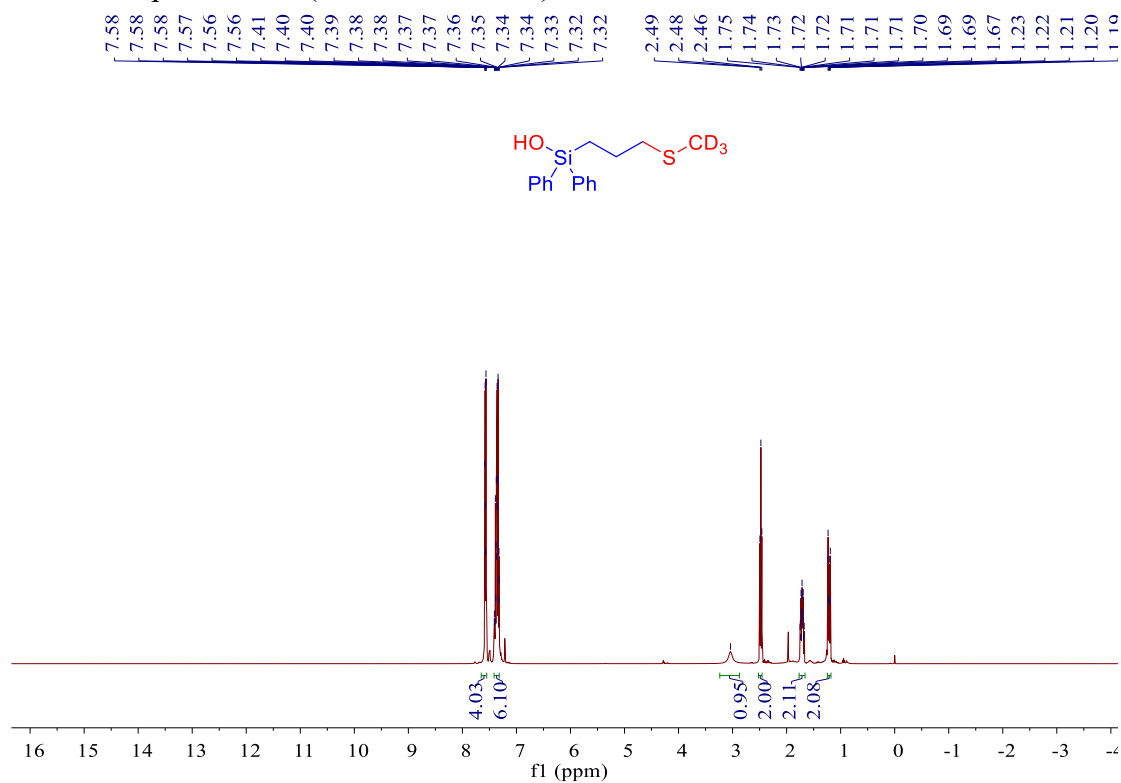

<sup>13</sup>C NMR Spectra of **5t** (100 MHz, CDCl<sub>3</sub>)

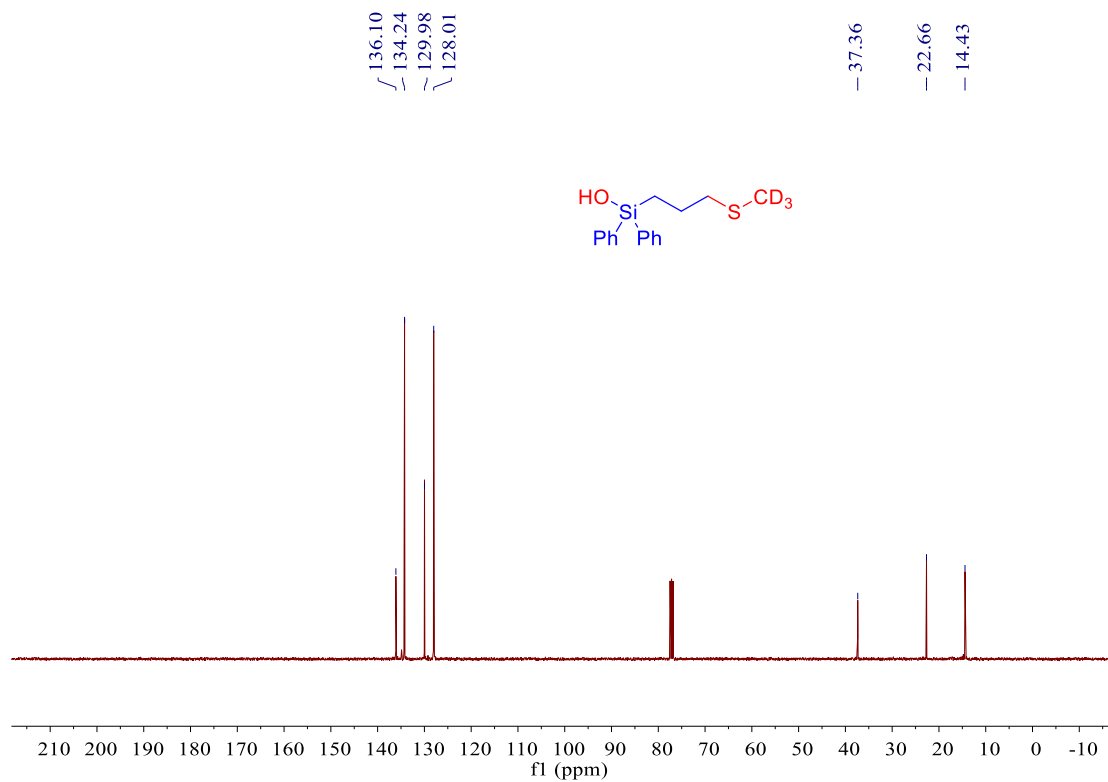

<sup>1</sup>H NMR Spectra of **5u** (400 MHz, CDCl<sub>3</sub>)

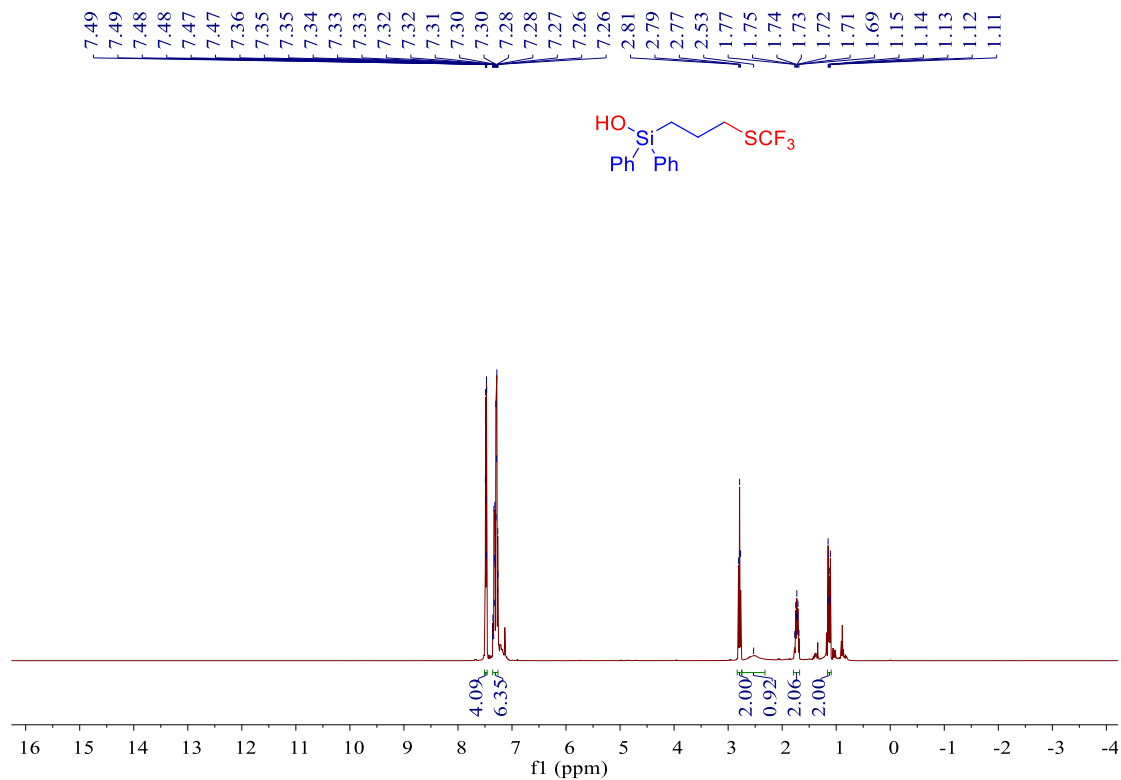

<sup>13</sup>C NMR Spectra of **5u** (100 MHz, CDCl<sub>3</sub>)

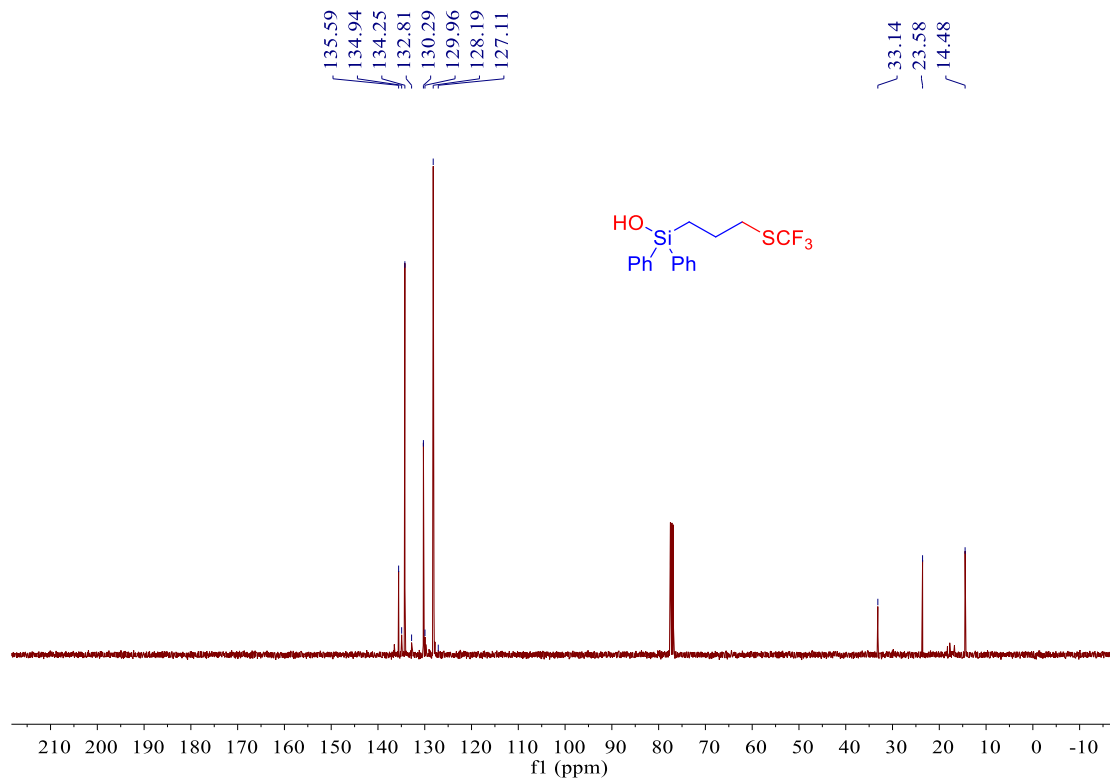

<sup>19</sup>F NMR Spectra of **5u** (100 MHz, CDCl<sub>3</sub>)

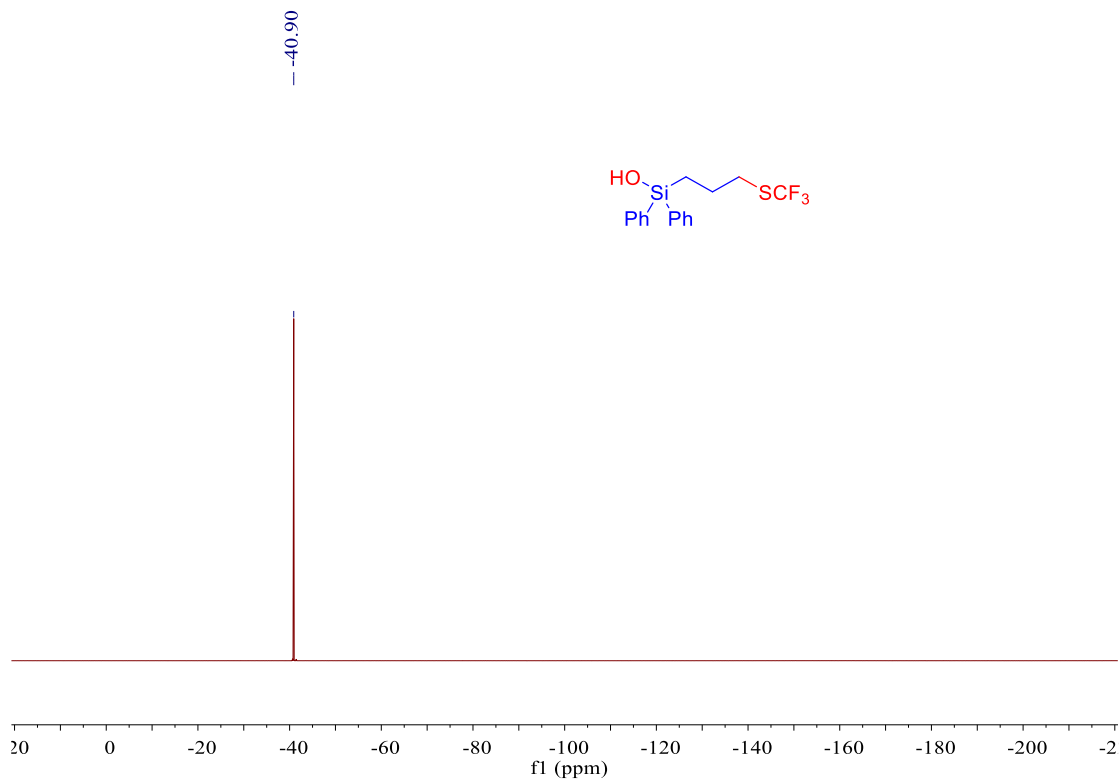

<sup>1</sup>H NMR Spectra of **3c'** (400 MHz, CDCl<sub>3</sub>)

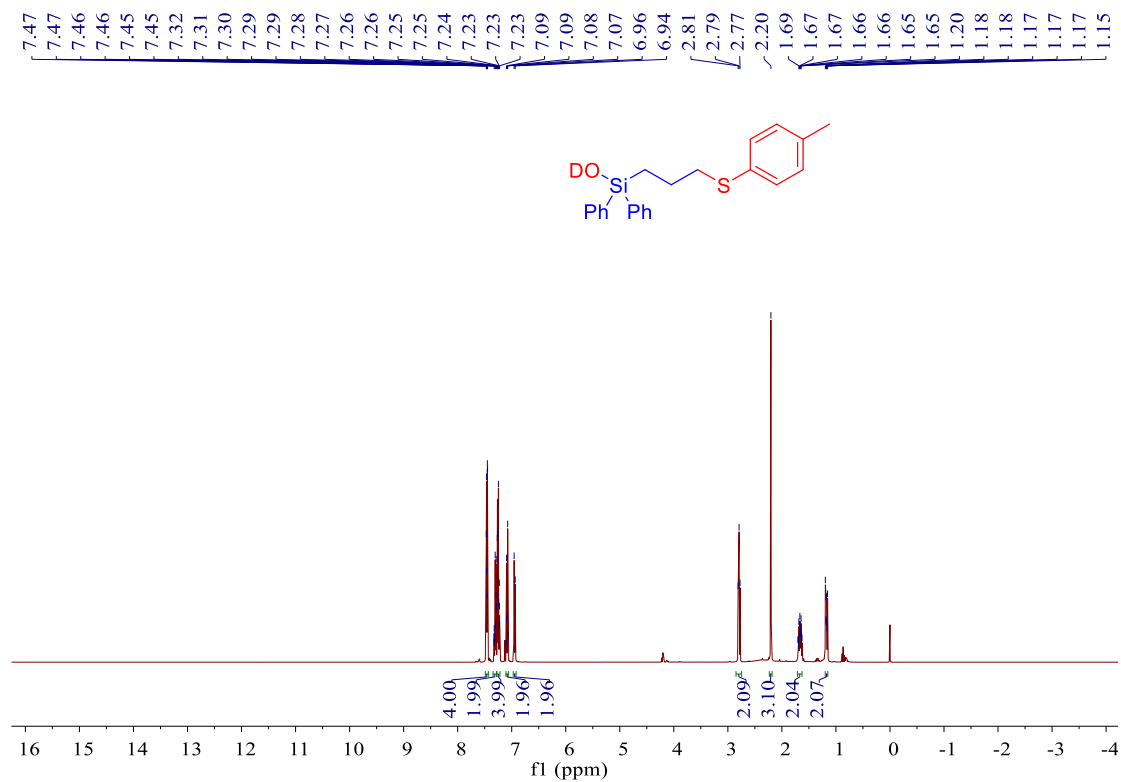

<sup>13</sup>C NMR Spectra of **3c'** (100 MHz, CDCl<sub>3</sub>)

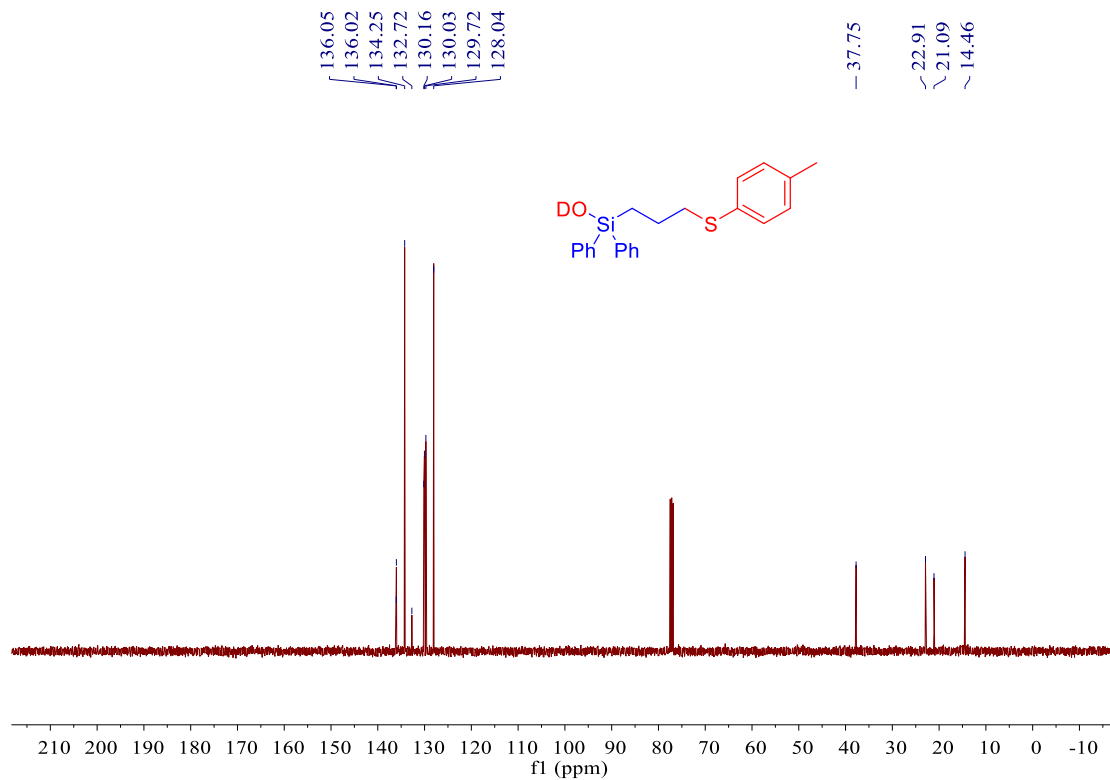

### <sup>1</sup>H NMR Spectra of **5s** (400 MHz, CDCl<sub>3</sub>)

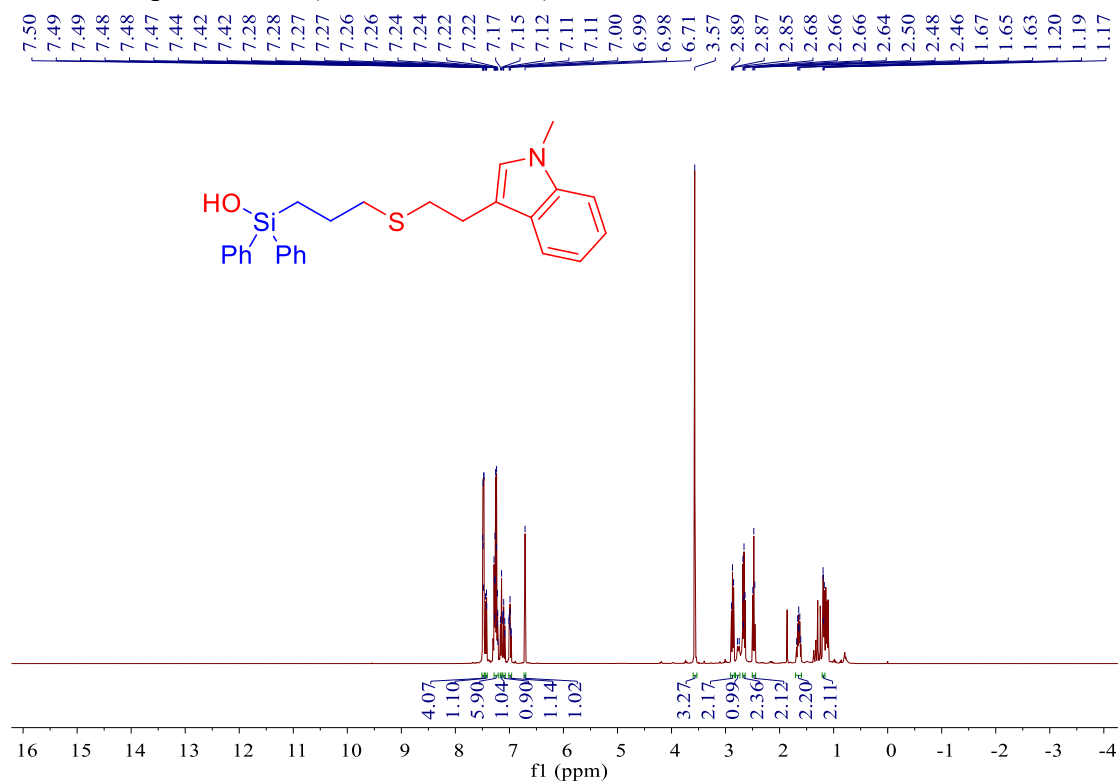

### <sup>13</sup>C NMR Spectra of **5s** (100 MHz, CDCl<sub>3</sub>)

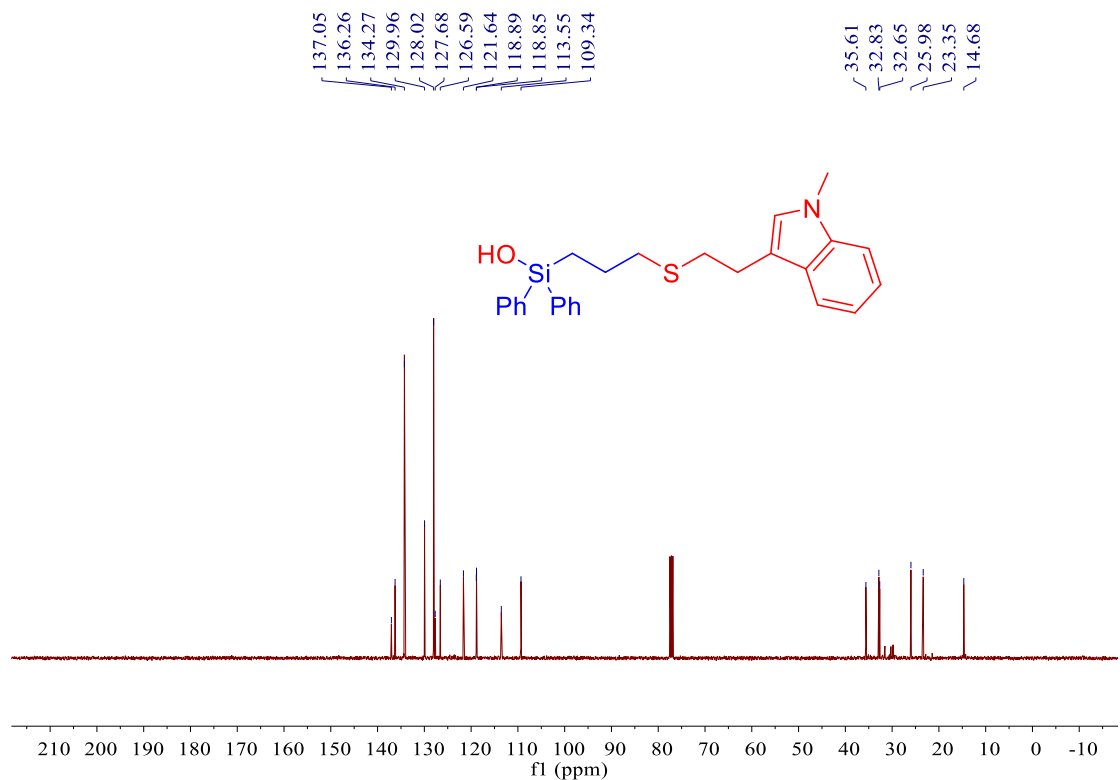

Supplement: d2cc04512e1.pdf [file d2cc04512e1.pdf]
